# Supplementary material for: Amplification of LTRs of Extrachromosomal Linear DNAs (ALE-seq) Identifies Two Active Oryco LTR Retrotransposons in the Rice Cultivar Dongjin
Source: Research Square preprint supplement (doi:10.21203/rs.3.rs-1270987/v1), 2022-01-20
Supplement: Supplementary file 1 [file 5c371ce23564295a8774fd7c.docx]

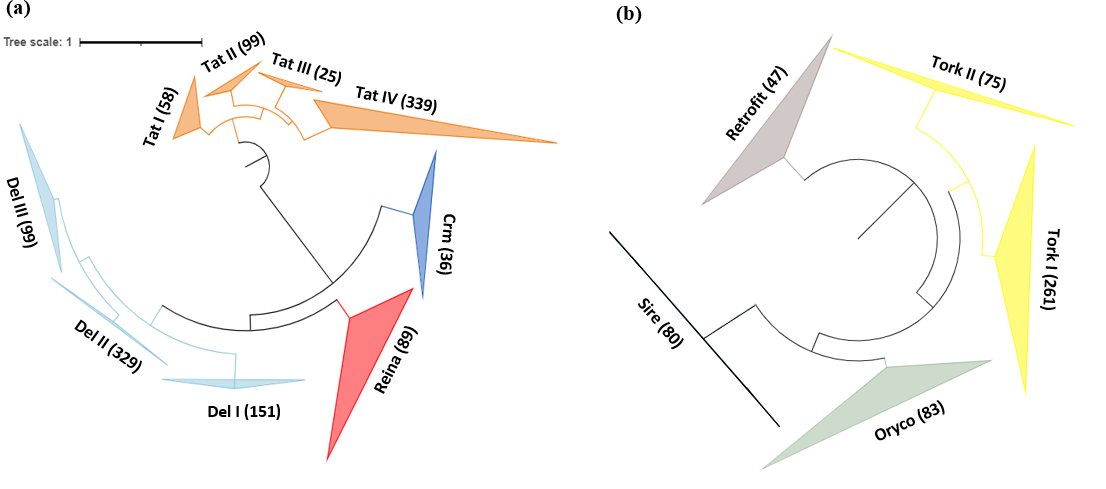
 **Fig S1.** Phylogenetic analysis of active long terminal repeat retrotransposons (LTR-RTs) based on the reverse-transcriptase (RT) domain. Maximum likelihood phylogenies of **(a)** *Gypsy* and **(b)** *Copia* superfamily members. In the tree, branch color denotes each family of LTR-RTs. Numbers indicate the number of members in each family. The amino acid sequences of the RT domains were aligned using MAFFT.


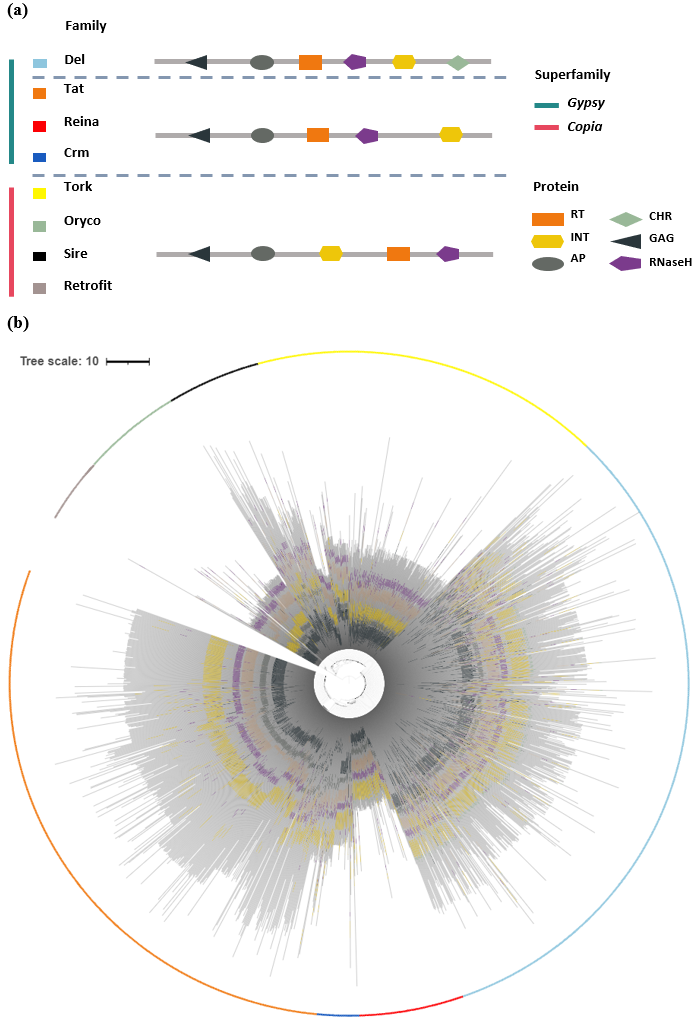


**Fig S2.** Domain structures and phylogenetic analysis of LTR-RT family members **(a)** Representative domain structures in each family. **(b)** Phylogenetic tree constructed using reverse-transcriptase (RT) domain sequences based on the maximum-likelihood method. Black triangle represents the GAG domain; gray circle represents the AP domain; orange rectangle represents the RT domain; yellow hexagon represents the INT domain; green diamond represents the CHR domain; purple pentagon represents the RNaseH domain. In the tree, the colors represent each LTR-RT family. Gray line indicates each amino acid sequence length in the LTR-RTs.


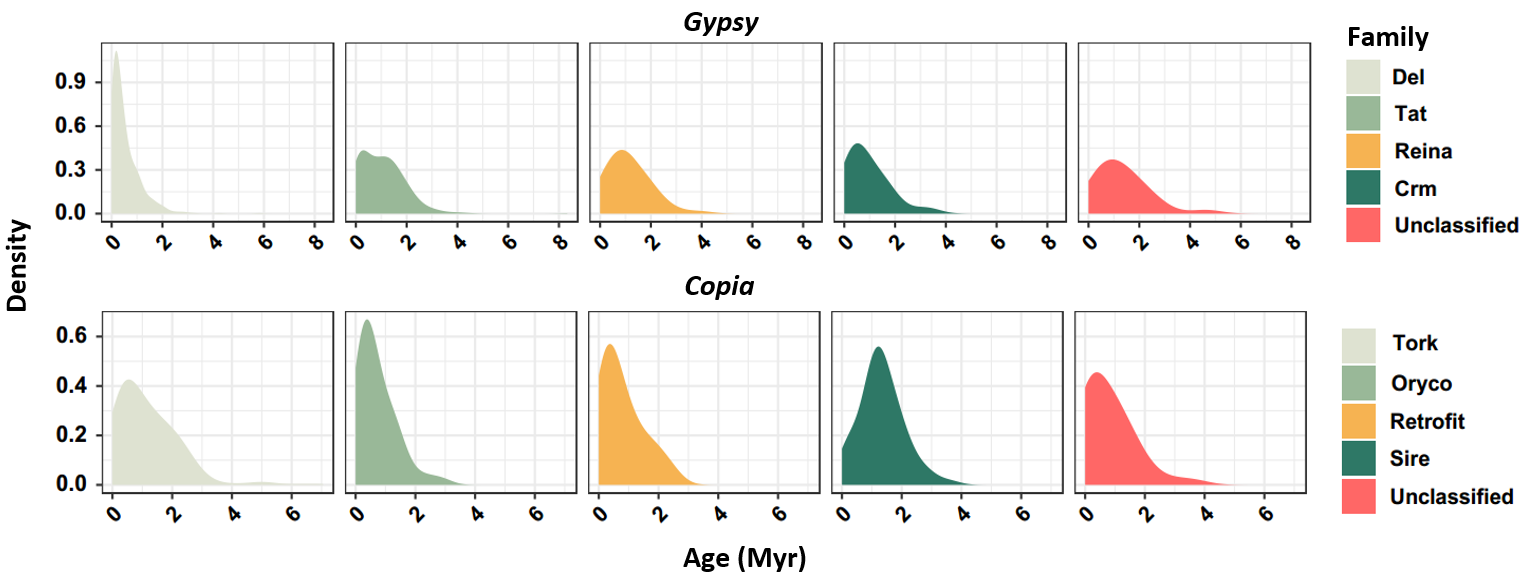
 **Fig S3.** Age distribution of LTR-RTs for each family.


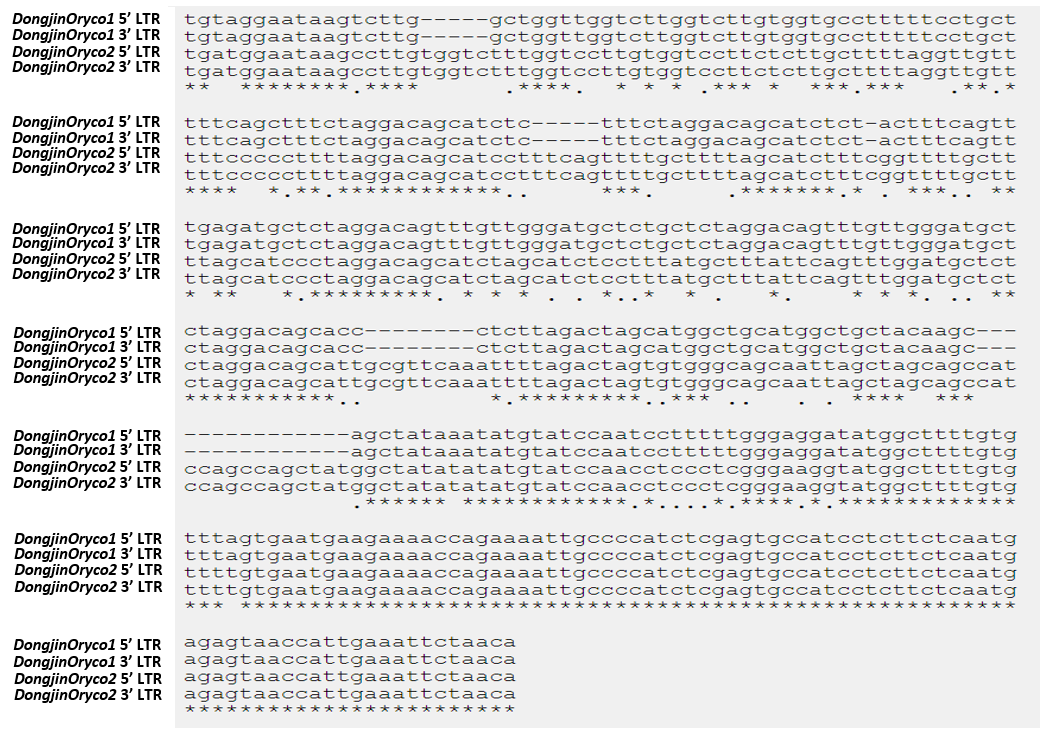
 **Fig S4.** Sequence alignment of the LTR sequences of the two active LTR-RTs.


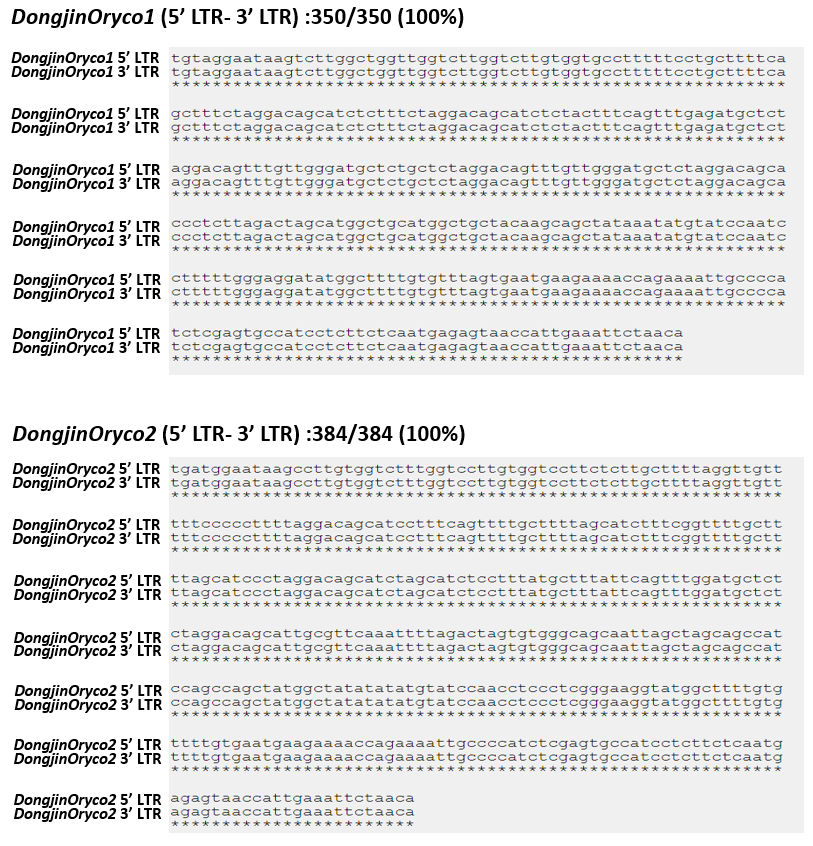
 **Fig S5.** Sequence alignment of LTR pairs for each active LTR-RT belonging to the Oryco family.


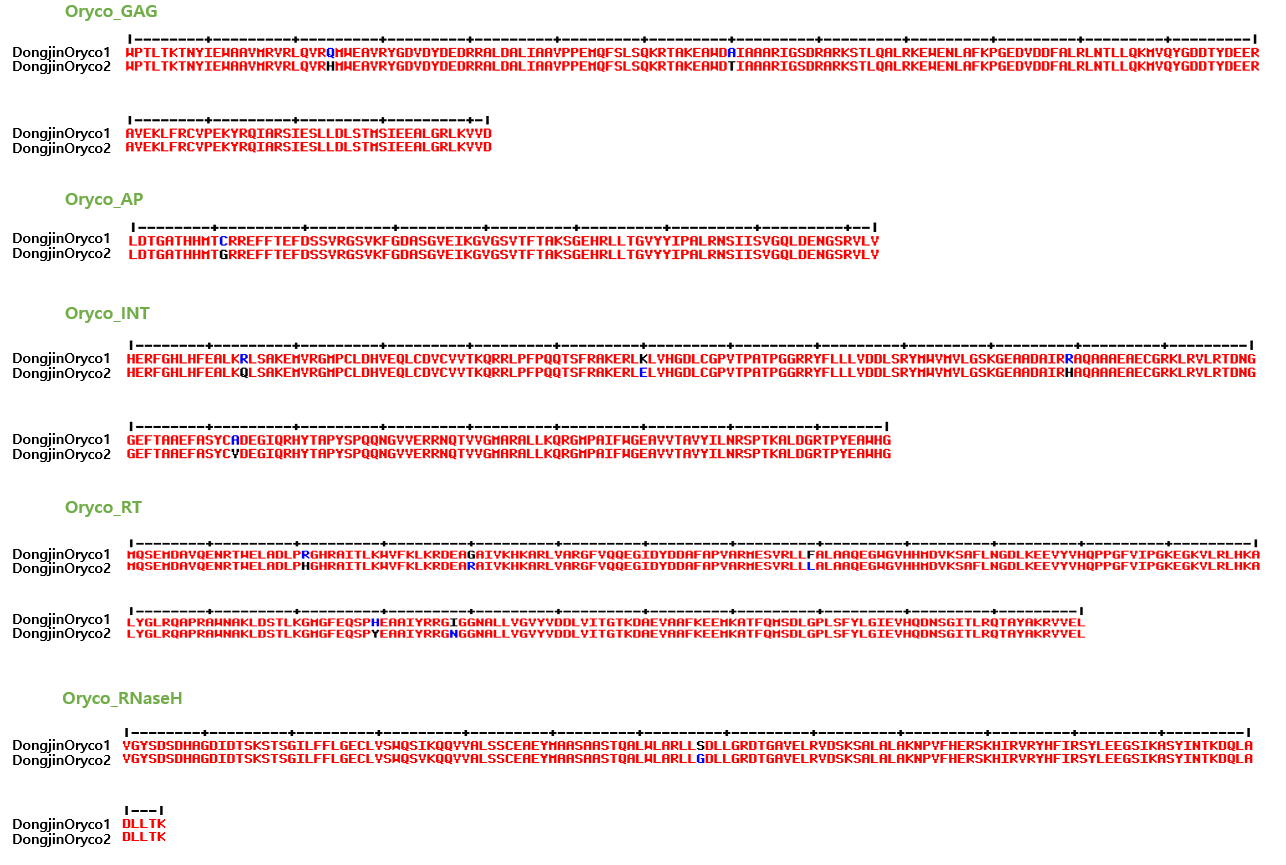


**Fig S6.** Multiple sequence alignment of the internal domain sequences of active LTR-RTs belonging to the Oryco family. Red represents the same amino acid sequence, whereas black and blue indicate amino acid sequence variations.


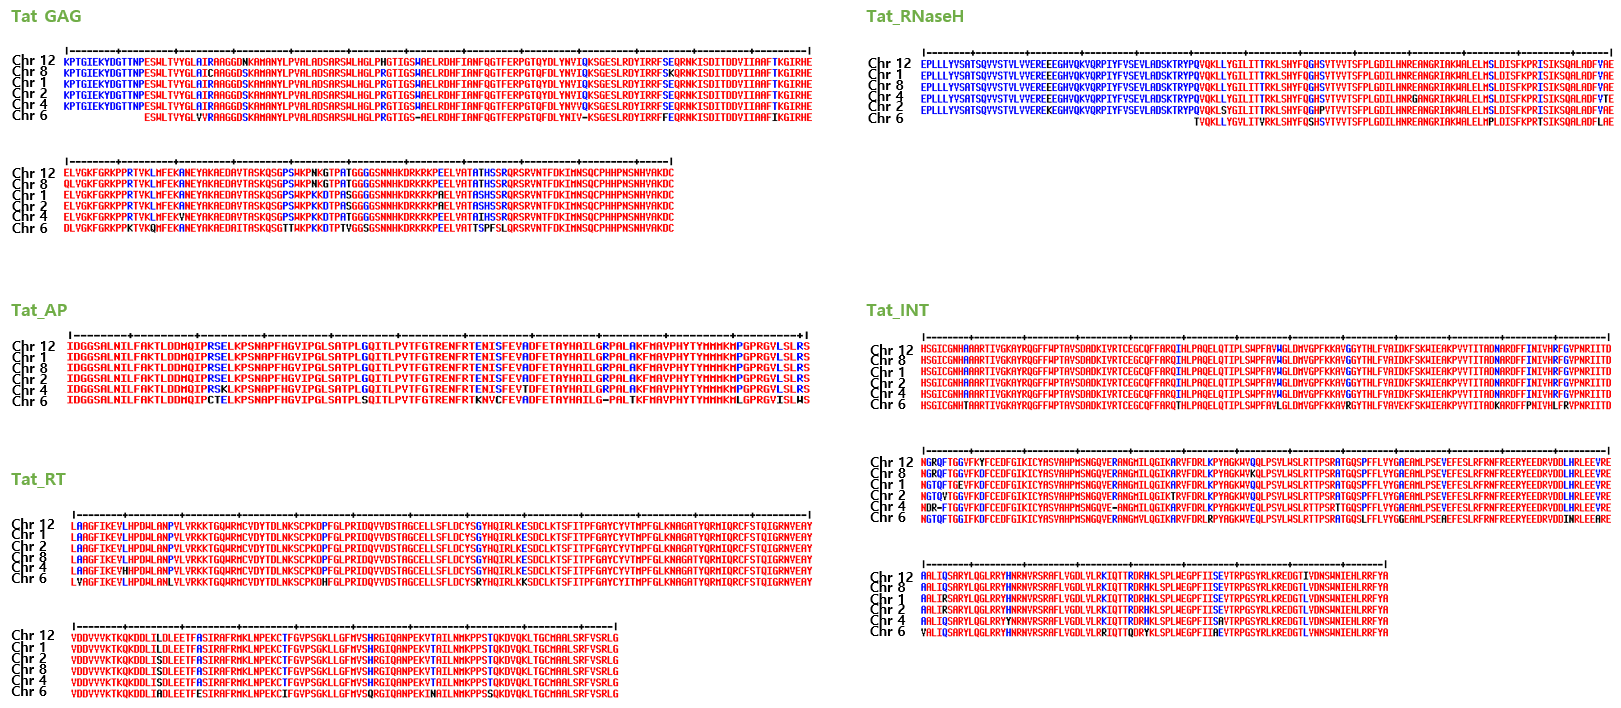
 **Fig S7.** Multiple sequence alignment of the internal domain sequences of LTR-RTs belonging to the Tat family with slightly increasing transpositional potential. Red represents the same amino acid sequence, whereas black and blue indicate amino acid sequence variations.


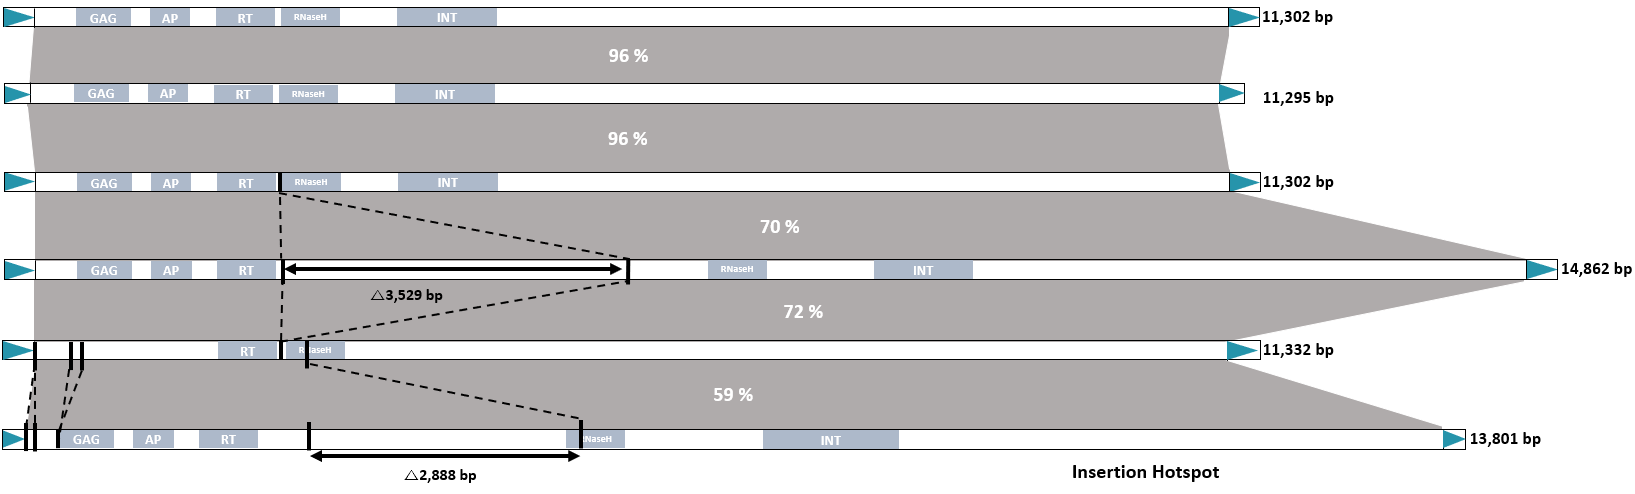


**Fig S8.** Structural characteristics of six LTR-RTs with slightly increasing transpositional potential in the Dongjin variety. Green triangles indicate LTR regions. Gray boxes indicates the internal domains of the LTR-RTs: GAG: capsid protein, AP: aspartic protease, INT: integrase, RT: reverse-transcriptase. Gray panels represent the sequence similarity for the internal regions among six Tat family members. Indel variations for each family member are indicated.


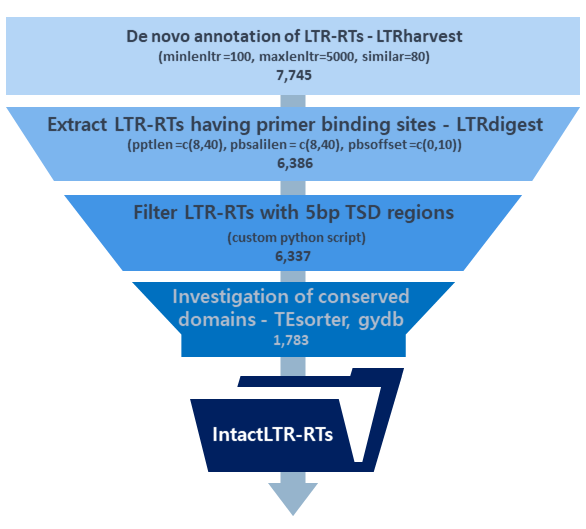


**Fig S9.** Pipeline for LTR-RT identification in the *O. sativa* genome (MSU7 version).
