# Supplementary material for: Amplification of LTRs of Extrachromosomal Linear DNAs (ALE-seq) Identifies Two Active Oryco LTR Retrotransposons in the Rice Cultivar Dongjin
Source: Research Square preprint supplement (doi:10.21203/rs.3.rs-1270987/v1), 2022-01-20
Supplement: Supplementary file 2 [file 899a864a7ab15dfe26d6f29e.xlsx]

## Sheet: S1
Table S1. Numbers of active LTR-RTs members for each family
Superfamily	Family	Count of Family	Proportion (%)	Strong active LTR-RTs in Dongjin	Moderate active LTR-RTs in Dongjin	Strong active LTR-RTs in Nipponbare [15]	Moderate active LTR-RTs in Nipponbare [15]
Gypsy	Del	577	32.36
	Tat	508	28.49		6
	Reina	54	3.03
	Unclassified	51	2.86
	Crm	36	2.02
Copia	Tork	297	16.66
	Oryco	85	4.77	2
	Sire	80	4.49
	Retrofit	53	2.97
	Unclassified	42	2.36			1 (Tos 17)	1 (Tos 19)
Total		1783	100	2	6	1	1

## Sheet: S2
Table S2. Domain order for each LTR-RTs
LTR	Superfamily	Clade	Strand	Domains
Chr10_10038062_10048419	Gypsy	del	+	GAG|del AP|del RT|del RNaseH|del INT|del CHR|retroelement
Chr10_10133938_10145940	Gypsy	del	+	GAG|del AP|del RT|del RNaseH|del INT|del CHR|retroelement
Chr10_10284407_10292022	Gypsy	crm	+	GAG|crm AP|crm RT|crm RNaseH|crm INT|crm
Chr10_10363327_10374706	Gypsy	del	+	GAG|del AP|del RT|del RNaseH|del INT|del CHR|retroelement
Chr10_10591590_10604406	Gypsy	tat	+	GAG|tat AP|tat RT|tat RNaseH|tat INT|tat
Chr10_10606492_10613730	Gypsy	crm	+	GAG|crm AP|crm RT|crm RNaseH|crm INT|crm
Chr10_10687691_10692749	Copia	tork	+	GAG|tork AP|tork INT|tork RT|tork RNaseH|tork
Chr10_11152838_11158777	Copia	tork	+	GAG|tork AP|tork INT|tork RT|tork RNaseH|tork
Chr10_11358440_11370117	Gypsy	tat	+	GAG|tat AP|tat RT|tat RNaseH|tat INT|tat
Chr10_11763823_11776669	Gypsy	tat	+	GAG|tat AP|tat RT|tat RNaseH|tat INT|tat
Chr10_1216016_1222177	Copia	tork	+	GAG|tork AP|tork INT|tork RT|tork RNaseH|tork
Chr10_12245282_12254453	Gypsy	del	+	GAG|del AP|del RT|del RNaseH|del INT|del
Chr10_12506536_12511869	Gypsy	reina	+	GAG|reina AP|reina RT|reina RNaseH|reina INT|reina
Chr10_12544573_12557199	Gypsy	del	+	GAG|del AP|del RT|del RNaseH|del INT|del CHR|retroelement
Chr10_12589502_12599660	Gypsy	del	+	GAG|del AP|del RT|del RNaseH|del INT|del CHR|retroelement
Chr10_12614666_12626168	Gypsy	del	+	GAG|del AP|del RT|del RNaseH|del INT|del CHR|retroelement
Chr10_12631593_12642972	Gypsy	del	+	GAG|del AP|del RT|del RNaseH|del INT|del CHR|retroelement
Chr10_12715792_12726068	Gypsy	del	+	GAG|del AP|del RT|del RNaseH|del INT|del CHR|retroelement
Chr10_12902630_12914031	Gypsy	tat	+	AP|tat RT|tat RNaseH|tat INT|tat
Chr10_13174340_13179852	Copia	oryco	+	GAG|oryco AP|oryco INT|oryco RT|oryco RNaseH|oryco
Chr10_13198720_13209738	Gypsy	del	+	GAG|del AP|del RT|del RNaseH|del INT|del CHR|retroelement
Chr10_13315554_13324019	Gypsy	del	+	GAG|del AP|del RT|del RNaseH|del INT|del CHR|retroelement
Chr10_13407883_13422845	Gypsy	tat	+	GAG|tat AP|tat RT|tat RNaseH|tat INT|tat
Chr10_13472432_13478523	Copia	oryco	+	GAG|oryco AP|oryco INT|oryco RT|oryco RNaseH|oryco
Chr10_1368799_1379703	Gypsy	del	+	GAG|del AP|del RT|del RNaseH|del INT|del CHR|retroelement
Chr10_1395449_1404106	Copia	tork	+	GAG|tork AP|tork INT|tork RT|tork RNaseH|tork
Chr10_14158290_14169567	Gypsy	tat	+	GAG|tat AP|tat RT|tat RNaseH|tat INT|tat
Chr10_14240899_14252644	Gypsy	tat	+	GAG|tat AP|tat RT|tat RNaseH|tat INT|tat
Chr10_14989916_15000877	Gypsy	del	+	GAG|del AP|del RT|del RNaseH|del INT|del CHR|retroelement
Chr10_15282168_15287387	Copia	oryco	+	GAG|oryco AP|oryco INT|oryco RT|oryco RNaseH|oryco
Chr10_15415374_15419577	Copia	mixture	+	AP|ty1/copia INT|retrofit RT|tork RNaseH|retrofit
Chr10_15551326_15557268	Copia	tork	+	GAG|tork AP|tork INT|tork RT|tork RNaseH|tork
Chr10_16187004_16195908	Copia	tork	+	GAG|tork AP|tork INT|tork RT|tork RNaseH|tork
Chr10_16353263_16362471	Copia	tork	+	GAG|tork AP|tork INT|tork RT|tork RNaseH|tork
Chr10_16371699_16377314	Copia	tork	+	GAG|tork AP|tork INT|tork RT|tork RNaseH|tork
Chr10_17275502_17286822	Gypsy	tat	+	GAG|tat AP|tat RT|tat RNaseH|tat INT|tat
Chr10_17700638_17706257	Copia	tork	+	GAG|tork AP|tork INT|tork RT|tork RNaseH|tork
Chr10_18208408_18213515	Copia	tork	+	GAG|tork AP|tork INT|tork RT|tork RNaseH|tork
Chr10_18289873_18294301	Copia	mixture	+	AP|ty1/copia INT|retrofit RT|tork RNaseH|retrofit
Chr10_18456076_18470266	Gypsy	tat	+	AP|tat RT|tat RNaseH|tat INT|tat
Chr10_18476617_18482493	Copia	oryco	+	GAG|oryco AP|oryco INT|oryco RT|oryco RNaseH|oryco
Chr10_1879581_1884783	Copia	oryco	+	GAG|oryco AP|oryco INT|oryco RT|oryco RNaseH|oryco
Chr10_19504520_19510917	Copia	tork	+	GAG|tork AP|tork INT|tork RT|tork RNaseH|tork
Chr10_19655030_19661257	Copia	tork	+	GAG|tork AP|tork INT|tork RT|tork RNaseH|tork
Chr10_1966811_1977725	Gypsy	tat	+	GAG|tat AP|tat RT|tat RNaseH|tat INT|tat
Chr10_19794923_19800611	Gypsy	reina	+	GAG|reina AP|reina RT|reina RNaseH|reina INT|reina
Chr10_20049757_20055560	Copia	tork	+	GAG|tork AP|tork INT|tork RT|tork RNaseH|tork
Chr10_20125998_20134373	Gypsy	reina	+	GAG|reina AP|reina RT|reina RNaseH|reina INT|reina
Chr10_20515135_20524792	Gypsy	del	+	GAG|del AP|del RT|del RNaseH|del INT|del CHR|retroelement
Chr10_209824_221091	Gypsy	tat	+	GAG|tat AP|tat RT|tat RNaseH|tat INT|tat
Chr10_21493394_21504696	Gypsy	tat	+	GAG|tat AP|tat RT|tat RNaseH|tat INT|tat
Chr10_21506416_21517836	Gypsy	tat	+	GAG|tat AP|tat RT|tat RNaseH|tat INT|tat
Chr10_21917177_21921894	Copia	retrofit	+	GAG|retrofit AP|retrofit INT|retrofit RT|retrofit RNaseH|retrofit
Chr10_21971873_21977800	Gypsy	mixture	+	GAG|reina AP|reina RT|reina RNaseH|reina INT|reina CHR|retroelement
Chr10_2215131_2219900	Copia	retrofit	+	GAG|retrofit AP|retrofit INT|retrofit RT|retrofit RNaseH|retrofit
Chr10_22300481_22306181	Copia	oryco	+	GAG|oryco AP|oryco INT|oryco RT|oryco RNaseH|oryco
Chr10_22402726_22408474	Copia	oryco	+	GAG|oryco AP|oryco INT|oryco RT|oryco RNaseH|oryco
Chr10_22612952_22624207	Gypsy	del	+	GAG|del AP|del RT|del RNaseH|del INT|del CHR|retroelement
Chr10_22802208_22811178	Gypsy	del	+	GAG|del AP|del RT|del RNaseH|del INT|del CHR|retroelement
Chr10_2641464_2656042	Copia	sire	+	GAG|sire AP|sire INT|sire RT|sire RNaseH|sire
Chr10_264715_273111	Copia	tork	+	GAG|tork AP|tork INT|tork RT|tork RNaseH|tork
Chr10_3192379_3201911	Gypsy	del	+	GAG|del AP|del RT|del RNaseH|del INT|del CHR|retroelement
Chr10_3223633_3235440	Gypsy	del	+	GAG|del AP|del RT|del RNaseH|del INT|del CHR|retroelement
Chr10_3244802_3256091	Gypsy	del	+	GAG|del AP|del RT|del RNaseH|del INT|del CHR|retroelement
Chr10_3300168_3310667	Gypsy	del	+	GAG|del AP|del RT|del RNaseH|del INT|del CHR|retroelement
Chr10_3312255_3326346	Gypsy	del	+	GAG|del AP|del RT|del RNaseH|del INT|del CHR|retroelement
Chr10_3361767_3372991	Gypsy	del	+	GAG|del AP|del RT|del RNaseH|del INT|del CHR|retroelement
Chr10_3554458_3569136	Gypsy	del	+	GAG|del AP|del RT|del RNaseH|del INT|del CHR|retroelement
Chr10_4132229_4146455	Gypsy	tat	+	GAG|tat AP|tat RT|tat RNaseH|tat INT|tat
Chr10_4175646_4189872	Gypsy	tat	+	GAG|tat AP|tat RT|tat RNaseH|tat INT|tat
Chr10_4229726_4239219	Gypsy	tat	+	GAG|tat AP|tat RT|tat RNaseH|tat INT|tat
Chr10_4420444_4431359	Gypsy	del	+	GAG|del AP|del RT|del RNaseH|del INT|del CHR|retroelement
Chr10_4549833_4558788	Gypsy	del	+	GAG|del AP|del RT|del RNaseH|del INT|del CHR|retroelement
Chr10_4715390_4725364	Gypsy	del	+	GAG|del AP|del RT|del RNaseH|del INT|del CHR|retroelement
Chr10_4764331_4775566	Gypsy	del	+	GAG|del AP|del RT|del RNaseH|del INT|del CHR|retroelement
Chr10_4899055_4910735	Gypsy	del	+	GAG|del AP|del RT|del RNaseH|del INT|del CHR|retroelement
Chr10_4976731_4988255	Gypsy	del	+	GAG|del AP|del RT|del RNaseH|del INT|del CHR|retroelement
Chr10_5023049_5037432	Gypsy	del	+	GAG|del AP|del RT|del RNaseH|del INT|del CHR|retroelement
Chr10_5045719_5054028	Copia	sire	+	GAG|sire AP|sire INT|sire RT|sire RNaseH|sire
Chr10_5065763_5078141	Gypsy	del	+	GAG|del AP|del RT|del RNaseH|del INT|del CHR|retroelement
Chr10_5123428_5135164	Gypsy	del	+	GAG|del AP|del RT|del RNaseH|del INT|del CHR|retroelement
Chr10_5296072_5309298	Gypsy	del	+	GAG|del AP|del RT|del RNaseH|del INT|del
Chr10_5383901_5389446	Copia	tork	+	GAG|tork AP|tork INT|tork RT|tork RNaseH|tork
Chr10_5703781_5710706	Copia	tork	+	GAG|tork AP|tork INT|tork RT|tork RNaseH|tork
Chr10_5742484_5754997	Gypsy	del	+	GAG|del AP|del RT|del RNaseH|del INT|del CHR|retroelement
Chr10_5848219_5860212	Gypsy	del	+	GAG|del AP|del RT|del RNaseH|del INT|del CHR|retroelement
Chr10_5990483_6001778	Gypsy	tat	+	GAG|tat AP|tat RT|tat RNaseH|tat INT|tat
Chr10_6039574_6050259	Gypsy	del	+	GAG|del AP|del RT|del RNaseH|del INT|del CHR|retroelement
Chr10_6116796_6129386	Copia	sire	+	GAG|sire AP|sire INT|sire RT|sire RNaseH|sire
Chr10_6254716_6263178	Copia	retrofit	+	GAG|retrofit AP|retrofit INT|retrofit RT|retrofit RNaseH|retrofit
Chr10_6323071_6335136	Gypsy	del	+	GAG|del AP|del RT|del RNaseH|del INT|del CHR|retroelement
Chr10_6435886_6447955	Gypsy	del	+	GAG|del AP|del RT|del RNaseH|del INT|del CHR|retroelement
Chr10_6465769_6475995	Gypsy	del	+	GAG|del AP|del RT|del RNaseH|del INT|del CHR|retroelement
Chr10_6606723_6621041	Gypsy	tat	+	GAG|tat AP|tat RT|tat RNaseH|tat INT|tat
Chr10_6762012_6774009	Gypsy	del	+	GAG|del AP|del RT|del RNaseH|del INT|del CHR|retroelement
Chr10_6801608_6812928	Gypsy	tat	+	GAG|tat AP|tat RT|tat RNaseH|tat INT|tat
Chr10_6961468_6974461	Gypsy	del	+	GAG|del AP|del RT|del RNaseH|del INT|del CHR|retroelement
Chr10_697196_706272	Copia	sire	+	GAG|sire AP|sire INT|sire RT|sire RNaseH|sire
Chr10_7069666_7081745	Gypsy	del	+	GAG|del AP|del RT|del RNaseH|del INT|del CHR|retroelement
Chr10_7126749_7138832	Gypsy	del	+	GAG|del AP|del RT|del RNaseH|del INT|del CHR|retroelement
Chr10_7228446_7239746	Gypsy	tat	+	GAG|tat AP|tat RT|tat RNaseH|tat INT|tat
Chr10_7316913_7327038	Gypsy	del	+	GAG|del AP|del RT|del RNaseH|del INT|del CHR|retroelement
Chr10_731932_743111	Gypsy	tat	+	GAG|tat AP|tat RT|tat RNaseH|tat INT|tat
Chr10_7376387_7384033	Gypsy	tat	+	AP|tat RT|tat RNaseH|tat INT|tat
Chr10_7427533_7433815	Copia	retrofit	+	GAG|retrofit AP|retrofit INT|retrofit RT|retrofit RNaseH|retrofit
Chr10_7600467_7611763	Gypsy	tat	+	GAG|tat AP|tat RT|tat RNaseH|tat INT|tat
Chr10_7832797_7844729	Gypsy	tat	+	GAG|tat AP|tat RT|tat RNaseH|tat INT|tat
Chr10_7873834_7888809	Gypsy	del	+	GAG|del AP|del RT|del RNaseH|del INT|del CHR|retroelement
Chr10_7890773_7898189	Gypsy	mixture	+	GAG|tat AP|tat RT|tat RNaseH|athila INT|tat
Chr10_8213645_8225732	Gypsy	del	+	GAG|del AP|del RT|del RNaseH|del INT|del CHR|retroelement
Chr10_8251876_8259643	Gypsy	crm	+	GAG|crm AP|crm RT|crm RNaseH|crm INT|crm
Chr10_8271588_8282570	Gypsy	del	+	GAG|del AP|del RT|del RNaseH|del INT|del CHR|retroelement
Chr10_8328359_8339097	Gypsy	del	+	GAG|del AP|del RT|del RNaseH|del INT|del CHR|retroelement
Chr10_8389936_8402767	Gypsy	tat	+	GAG|tat AP|tat RT|tat RNaseH|tat INT|tat
Chr10_8448715_8460791	Gypsy	del	+	GAG|del AP|del RT|del RNaseH|del INT|del CHR|retroelement
Chr10_8537364_8548707	Gypsy	del	+	GAG|del AP|del RT|del RNaseH|del INT|del CHR|retroelement
Chr10_8621340_8628427	Gypsy	del	+	GAG|del AP|del RT|del RNaseH|del INT|del CHR|retroelement
Chr10_8664080_8678572	Gypsy	tat	+	GAG|tat AP|tat RT|tat RNaseH|tat INT|tat
Chr10_8742827_8754151	Gypsy	del	+	GAG|del AP|del RT|del RNaseH|del INT|del CHR|retroelement
Chr10_8851445_8863996	Gypsy	del	+	GAG|del AP|del RT|del RNaseH|del INT|del CHR|retroelement
Chr10_8894809_8906530	Gypsy	tat	+	GAG|tat AP|tat RT|tat RNaseH|tat INT|tat
Chr10_9010421_9022329	Gypsy	del	+	GAG|del AP|del RT|del RNaseH|del INT|del CHR|retroelement
Chr10_9043119_9053040	Gypsy	del	+	GAG|del AP|del RT|del RNaseH|del INT|del
Chr10_9127007_9135631	Gypsy	tat	+	AP|tat RT|tat RNaseH|tat INT|tat
Chr10_9239460_9251082	Gypsy	del	+	GAG|del AP|del RT|del RNaseH|del INT|del CHR|retroelement
Chr10_9291455_9302941	Gypsy	del	+	GAG|del AP|del RT|del RNaseH|del INT|del CHR|retroelement
Chr10_957861_970863	Gypsy	tat	+	GAG|tat AP|tat RT|tat RNaseH|tat INT|tat
Chr10_9610100_9615311	Copia	retrofit	+	GAG|retrofit AP|retrofit INT|retrofit RT|retrofit RNaseH|retrofit
Chr10_9732092_9743364	Gypsy	tat	+	GAG|tat AP|tat RT|tat RNaseH|tat INT|tat
Chr10_9820273_9826520	Copia	tork	+	GAG|tork AP|tork INT|tork RT|tork RNaseH|tork
Chr10_9869969_9875524	Copia	tork	+	GAG|tork AP|tork INT|tork RT|tork RNaseH|tork
Chr11_10209101_10215561	Copia	tork	+	GAG|tork AP|tork INT|tork RT|tork RNaseH|tork
Chr11_1054588_1060832	Copia	tork	+	GAG|tork AP|tork INT|tork RT|tork RNaseH|tork
Chr11_10670870_10682973	Gypsy	tat	+	GAG|tat AP|tat RT|tat RNaseH|tat INT|tat
Chr11_10991670_10998105	Copia	tork	+	GAG|tork AP|tork INT|tork RT|tork RNaseH|tork
Chr11_11170698_11182376	Gypsy	del	+	GAG|del AP|del RT|del RNaseH|del INT|del CHR|retroelement
Chr11_11242233_11253686	Gypsy	tat	+	GAG|tat AP|tat RT|tat RNaseH|tat INT|tat
Chr11_11273810_11280171	Gypsy	tat	+	AP|tat RT|tat RNaseH|tat INT|tat
Chr11_11293777_11307674	Copia	sire	+	GAG|sire AP|sire INT|sire RT|sire RNaseH|sire
Chr11_11312551_11325130	Gypsy	tat	+	GAG|tat AP|tat RT|tat RNaseH|tat INT|tat
Chr11_11459536_11470990	Gypsy	del	+	GAG|del AP|del RT|del RNaseH|del INT|del CHR|retroelement
Chr11_11614606_11630940	Gypsy	tat	+	GAG|tat AP|tat RT|tat RNaseH|tat INT|tat
Chr11_11635883_11647050	Gypsy	del	+	GAG|del AP|del RT|del RNaseH|del INT|del CHR|retroelement
Chr11_11673225_11683205	Gypsy	del	+	GAG|del AP|del RT|del RNaseH|del INT|del CHR|retroelement
Chr11_11707426_11712606	Gypsy	mixture	+	GAG|reina AP|reina RT|reina RNaseH|reina INT|reina CHR|retroelement
Chr11_11808147_11821552	Gypsy	tat	+	GAG|tat AP|tat RT|tat RNaseH|tat INT|tat
Chr11_1182880_1199180	Gypsy	del	+	GAG|del AP|del RT|del RNaseH|del INT|del CHR|retroelement
Chr11_11832201_11844279	Gypsy	del	+	GAG|del AP|del RT|del RNaseH|del INT|del CHR|retroelement
Chr11_11943732_11954719	Gypsy	del	+	GAG|del AP|del RT|del RNaseH|del INT|del CHR|retroelement
Chr11_12211641_12221655	Gypsy	del	+	GAG|del AP|del RT|del RNaseH|del INT|del CHR|retroelement
Chr11_12249476_12260219	Gypsy	del	+	GAG|del AP|del RT|del RNaseH|del INT|del CHR|retroelement
Chr11_12495105_12505119	Gypsy	del	+	GAG|del AP|del RT|del RNaseH|del INT|del CHR|retroelement
Chr11_12532984_12543727	Gypsy	del	+	GAG|del AP|del RT|del RNaseH|del INT|del CHR|retroelement
Chr11_12587622_12594641	Gypsy	del	+	GAG|del AP|del RT|del RNaseH|del INT|del CHR|retroelement
Chr11_12597711_12605454	Gypsy	crm	+	GAG|crm AP|crm RT|crm RNaseH|crm INT|crm
Chr11_12617684_12627509	Gypsy	del	+	GAG|del AP|del RT|del RNaseH|del INT|del CHR|retroelement
Chr11_12746478_12756535	Gypsy	del	+	GAG|del AP|del RT|del RNaseH|del INT|del CHR|retroelement
Chr11_12796904_12810737	Gypsy	tat	+	GAG|tat AP|tat RT|tat RNaseH|tat INT|tat
Chr11_12823770_12829842	Copia	tork	+	GAG|tork AP|tork INT|tork RT|tork RNaseH|tork
Chr11_12873242_12886463	Gypsy	del	+	GAG|del AP|del RT|del RNaseH|del INT|del CHR|retroelement
Chr11_12951760_12961896	Gypsy	del	+	GAG|del AP|del RT|del RNaseH|del INT|del CHR|retroelement
Chr11_12963899_12974301	Gypsy	del	+	GAG|del AP|del RT|del RNaseH|del INT|del CHR|retroelement
Chr11_12974787_12987866	Gypsy	del	+	GAG|del AP|del RT|del RNaseH|del INT|del CHR|retroelement
Chr11_13128809_13138927	Gypsy	del	+	GAG|del AP|del RT|del RNaseH|del INT|del CHR|retroelement
Chr11_13166348_13176407	Gypsy	del	+	GAG|del AP|del RT|del RNaseH|del INT|del CHR|retroelement
Chr11_13313586_13328771	Gypsy	tat	+	AP|tat RT|tat RNaseH|tat INT|tat
Chr11_13568098_13580258	Gypsy	del	+	GAG|del AP|del RT|del RNaseH|del INT|del CHR|retroelement
Chr11_13583876_13591622	Gypsy	crm	+	GAG|crm AP|crm RT|crm RNaseH|crm INT|crm
Chr11_13604870_13614606	Gypsy	del	+	GAG|del AP|del RT|del RNaseH|del INT|del CHR|retroelement
Chr11_13728495_13739986	Gypsy	tat	+	GAG|tat AP|tat RT|tat RNaseH|tat INT|tat
Chr11_13816106_13831051	Gypsy	del	+	GAG|del AP|del RT|del RNaseH|del INT|del CHR|retroelement
Chr11_14189680_14200985	Gypsy	tat	+	GAG|tat AP|tat RT|tat RNaseH|tat INT|tat
Chr11_14589567_14600221	Gypsy	del	+	GAG|del AP|del RT|del RNaseH|del INT|del CHR|retroelement
Chr11_14790998_14802241	Gypsy	tat	+	GAG|tat AP|tat RT|tat RNaseH|tat INT|tat
Chr11_14898110_14907377	Gypsy	del	+	GAG|del AP|del RT|del RNaseH|del INT|del CHR|retroelement
Chr11_14984006_14993117	Gypsy	del	+	GAG|del AP|del RT|del RNaseH|del INT|del CHR|retroelement
Chr11_15152699_15162480	Gypsy	del	+	GAG|del AP|del RT|del RNaseH|del INT|del CHR|retroelement
Chr11_15183902_15195596	Gypsy	del	+	GAG|del AP|del RT|del RNaseH|del INT|del CHR|retroelement
Chr11_15565470_15575820	Gypsy	del	+	GAG|del AP|del RT|del RNaseH|del INT|del CHR|retroelement
Chr11_15641086_15652449	Gypsy	tat	+	GAG|tat AP|tat RT|tat RNaseH|tat INT|tat
Chr11_1574724_1580707	Copia	tork	+	GAG|tork AP|tork INT|tork RT|tork RNaseH|tork
Chr11_15771513_15780737	Gypsy	del	+	GAG|del AP|del RT|del RNaseH|del INT|del CHR|retroelement
Chr11_15919425_15925659	Copia	tork	+	GAG|tork AP|tork INT|tork RT|tork RNaseH|tork
Chr11_15978390_15991998	Gypsy	tat	+	GAG|tat AP|tat RT|tat RNaseH|tat INT|tat
Chr11_16025112_16034761	Gypsy	del	+	GAG|del AP|del RT|del RNaseH|del INT|del CHR|retroelement
Chr11_16230582_16242207	Gypsy	tat	+	GAG|tat AP|tat RT|tat RNaseH|tat INT|tat
Chr11_16343705_16352069	Gypsy	mixture	+	GAG|athila AP|tat RT|tat RNaseH|tat INT|tat
Chr11_16471451_16485581	Gypsy	tat	+	GAG|tat AP|tat RT|tat RNaseH|tat INT|tat
Chr11_16539441_16554006	Copia	tork	+	GAG|tork AP|tork INT|tork RT|tork RNaseH|tork
Chr11_16610590_16621508	Gypsy	tat	+	GAG|tat AP|tat RT|tat RNaseH|tat INT|tat
Chr11_17135214_17147766	Gypsy	tat	+	GAG|tat AP|tat RT|tat RNaseH|tat INT|tat
Chr11_17148170_17159071	Gypsy	tat	+	GAG|tat AP|tat RT|tat RNaseH|tat INT|tat
Chr11_17170176_17176813	Copia	tork	+	GAG|tork AP|tork INT|tork RT|tork RNaseH|tork
Chr11_17356502_17368095	Gypsy	tat	+	GAG|tat AP|tat RT|tat RNaseH|tat INT|tat
Chr11_17715092_17720685	Copia	tork	+	GAG|tork AP|tork INT|tork RT|tork RNaseH|tork
Chr11_17879238_17884465	Copia	mixture	+	AP|ty1/copia INT|retrofit RT|tork RNaseH|retrofit
Chr11_17957240_17968964	Gypsy	del	+	GAG|del AP|del RT|del RNaseH|del INT|del CHR|retroelement
Chr11_18017108_18028321	Gypsy	tat	+	GAG|tat AP|tat RT|tat RNaseH|tat INT|tat
Chr11_18063048_18068177	Gypsy	reina	+	GAG|reina AP|reina RT|reina RNaseH|reina INT|reina
Chr11_18709495_18715927	Copia	tork	+	GAG|tork AP|tork INT|tork RT|tork RNaseH|tork
Chr11_18795747_18801979	Copia	tork	+	GAG|tork AP|tork INT|tork RT|tork RNaseH|tork
Chr11_18846490_18857291	Gypsy	tat	+	GAG|tat AP|tat RT|tat RNaseH|tat INT|tat
Chr11_18888573_18894044	Gypsy	reina	+	GAG|reina AP|reina RT|reina RNaseH|reina INT|reina
Chr11_19001253_19008770	Gypsy	crm	+	GAG|crm AP|crm RT|crm RNaseH|crm INT|crm
Chr11_1972970_1978749	Copia	tork	+	GAG|tork AP|tork INT|tork RT|tork RNaseH|tork
Chr11_20242253_20254734	Gypsy	tat	+	GAG|tat AP|tat RT|tat RNaseH|tat INT|tat
Chr11_20464843_20471076	Copia	tork	+	GAG|tork AP|tork INT|tork RT|tork RNaseH|tork
Chr11_20637377_20643017	Gypsy	mixture	+	GAG|reina AP|reina RT|reina RNaseH|reina INT|reina CHR|retroelement
Chr11_20846950_20855498	Gypsy	del	+	GAG|del AP|del RT|del RNaseH|del INT|del
Chr11_20912403_20923606	Gypsy	del	+	GAG|del AP|del RT|del RNaseH|del INT|del CHR|retroelement
Chr11_21011220_21017013	Copia	tork	+	GAG|tork AP|tork INT|tork RT|tork RNaseH|tork
Chr11_21086351_21099199	Gypsy	mixture	+	GAG|athila AP|tat RT|tat RNaseH|tat INT|tat
Chr11_21223782_21232729	Copia	mixture	+	AP|ty1/copia INT|retrofit RT|tork RNaseH|retrofit
Chr11_21310102_21322146	Gypsy	del	+	GAG|del AP|del RT|del RNaseH|del INT|del CHR|retroelement
Chr11_21340299_21353386	Copia	retrofit	+	GAG|retrofit AP|retrofit INT|retrofit RT|retrofit RNaseH|retrofit
Chr11_21596672_21602344	Copia	tork	+	GAG|tork AP|tork INT|tork RT|tork RNaseH|tork
Chr11_21614046_21625465	Gypsy	tat	+	GAG|tat AP|tat RT|tat RNaseH|tat INT|tat
Chr11_21942976_21956441	Gypsy	tat	+	GAG|tat AP|tat RT|tat RNaseH|tat INT|tat
Chr11_22103399_22116109	Gypsy	del	+	GAG|del AP|del RT|del RNaseH|del INT|del CHR|retroelement
Chr11_22288837_22295596	Copia	tork	+	GAG|tork AP|tork INT|tork RT|tork RNaseH|tork
Chr11_22583145_22595744	Gypsy	del	+	GAG|del AP|del RT|del RNaseH|del INT|del CHR|retroelement
Chr11_23087287_23100728	Gypsy	del	+	GAG|del AP|del RT|del RNaseH|del INT|del CHR|retroelement
Chr11_23710434_23722942	Gypsy	del	+	GAG|del AP|del RT|del RNaseH|del INT|del CHR|retroelement
Chr11_23877001_23890013	Gypsy	tat	+	GAG|tat AP|tat RT|tat RNaseH|tat INT|tat
Chr11_24020000_24031947	Gypsy	tat	+	GAG|tat AP|tat RT|tat RNaseH|tat INT|tat
Chr11_24127925_24132929	Copia	retrofit	+	AP|retrofit INT|retrofit RT|retrofit RNaseH|retrofit
Chr11_24134965_24140994	Copia	tork	+	GAG|tork AP|tork INT|tork RT|tork RNaseH|tork
Chr11_24142340_24153620	Gypsy	del	+	GAG|del AP|del RT|del RNaseH|del INT|del CHR|retroelement
Chr11_24350511_24363160	Gypsy	del	+	GAG|del AP|del RT|del RNaseH|del INT|del CHR|retroelement
Chr11_24441068_24445955	Copia	retrofit	+	GAG|retrofit AP|retrofit INT|retrofit RT|retrofit RNaseH|retrofit
Chr11_24738416_24749838	Gypsy	tat	+	GAG|tat AP|tat RT|tat RNaseH|tat INT|tat
Chr11_24878374_24890309	Gypsy	tat	+	GAG|tat AP|tat RT|tat RNaseH|tat INT|tat
Chr11_25066223_25077517	Gypsy	tat	+	GAG|tat AP|tat RT|tat RNaseH|tat INT|tat
Chr11_25370238_25383148	Gypsy	tat	+	GAG|tat AP|tat RT|tat RNaseH|tat INT|tat
Chr11_25448900_25460901	Gypsy	del	+	GAG|del AP|del RT|del RNaseH|del INT|del CHR|retroelement
Chr11_25479647_25490962	Gypsy	tat	+	GAG|tat AP|tat RT|tat RNaseH|tat INT|tat
Chr11_25666150_25679380	Gypsy	tat	+	GAG|tat AP|tat RT|tat RNaseH|tat INT|tat
Chr11_25681792_25693780	Gypsy	del	+	GAG|del AP|del RT|del RNaseH|del INT|del CHR|retroelement
Chr11_25726763_25734771	Copia	oryco	+	GAG|oryco AP|oryco INT|oryco RT|oryco RNaseH|oryco
Chr11_26077309_26081695	Copia	retrofit	+	GAG|retrofit AP|retrofit INT|retrofit RT|retrofit RNaseH|retrofit
Chr11_26180935_26192236	Gypsy	tat	+	GAG|tat AP|tat RT|tat RNaseH|tat INT|tat
Chr11_26239479_26250128	Gypsy	del	+	GAG|del AP|del RT|del RNaseH|del INT|del CHR|retroelement
Chr11_26621754_26633063	Gypsy	tat	+	GAG|tat AP|tat RT|tat RNaseH|tat INT|tat
Chr11_26647767_26659847	Gypsy	del	+	GAG|del AP|del RT|del RNaseH|del INT|del CHR|retroelement
Chr11_26851007_26857166	Copia	tork	+	GAG|tork AP|tork INT|tork RT|tork RNaseH|tork
Chr11_26924792_26931697	Copia	tork	+	GAG|tork AP|tork INT|tork RT|tork RNaseH|tork
Chr11_27062207_27074281	Gypsy	del	+	GAG|del AP|del RT|del RNaseH|del INT|del CHR|retroelement
Chr11_27091493_27100455	Gypsy	tat	+	GAG|tat AP|tat RT|tat RNaseH|tat INT|tat
Chr11_27355759_27361204	Gypsy	reina	+	GAG|reina AP|reina RT|reina RNaseH|reina INT|reina
Chr11_27369084_27380380	Gypsy	tat	+	GAG|tat AP|tat RT|tat RNaseH|tat INT|tat
Chr11_27628398_27641285	Gypsy	tat	+	GAG|tat AP|tat RT|tat RNaseH|tat INT|tat
Chr11_27765677_27772052	Copia	mixture	+	AP|ty1/copia INT|retrofit RT|tork RNaseH|sire
Chr11_28661532_28676451	Gypsy	tat	+	AP|tat RT|tat RNaseH|tat INT|tat
Chr11_28707296_28713608	Copia	tork	+	GAG|tork AP|tork INT|tork RT|tork RNaseH|tork
Chr11_3398453_3409976	Gypsy	del	+	GAG|del AP|del RT|del RNaseH|del INT|del CHR|retroelement
Chr11_378146_384253	Copia	tork	+	GAG|tork AP|tork INT|tork RT|tork RNaseH|tork
Chr11_3934613_3948717	Gypsy	tat	+	GAG|tat AP|tat RT|tat RNaseH|tat INT|tat
Chr11_3961427_3975420	Gypsy	del	+	GAG|del AP|del RT|del RNaseH|del INT|del CHR|retroelement
Chr11_4265814_4282841	Gypsy	del	+	GAG|del AP|del RT|del RNaseH|del INT|del CHR|retroelement
Chr11_4976011_4989019	Gypsy	tat	+	GAG|tat AP|tat RT|tat RNaseH|tat INT|tat
Chr11_4998143_5003671	Copia	oryco	+	GAG|oryco AP|oryco INT|oryco RT|oryco RNaseH|oryco
Chr11_517640_525459	Copia	sire	+	GAG|sire AP|sire INT|sire RT|sire RNaseH|sire
Chr11_5499678_5511231	Gypsy	del	+	GAG|del AP|del RT|del RNaseH|del INT|del CHR|retroelement
Chr11_5963001_5974298	Gypsy	tat	+	GAG|tat AP|tat RT|tat RNaseH|tat INT|tat
Chr11_6006998_6019519	Gypsy	del	+	GAG|del AP|del RT|del RNaseH|del INT|del CHR|retroelement
Chr11_6173675_6185244	Gypsy	del	+	GAG|del AP|del RT|del RNaseH|del INT|del CHR|retroelement
Chr11_6313519_6319727	Copia	tork	+	GAG|tork AP|tork INT|tork RT|tork RNaseH|tork
Chr11_6497514_6505996	Gypsy	reina	+	GAG|reina AP|reina RT|reina RNaseH|reina INT|reina
Chr11_6709967_6721454	Gypsy	del	+	GAG|del AP|del RT|del RNaseH|del INT|del CHR|retroelement
Chr11_6732627_6745834	Gypsy	del	+	GAG|del AP|del RT|del RNaseH|del INT|del
Chr11_6762595_6772398	Gypsy	del	+	GAG|del AP|del RT|del RNaseH|del INT|del
Chr11_6804161_6815742	Gypsy	del	+	GAG|del AP|del RT|del RNaseH|del INT|del CHR|retroelement
Chr11_7296470_7308547	Gypsy	del	+	GAG|del AP|del RT|del RNaseH|del INT|del CHR|retroelement
Chr11_8038456_8046019	Gypsy	crm	+	GAG|crm AP|crm RT|crm RNaseH|crm INT|crm
Chr11_8111454_8121601	Gypsy	tat	+	AP|tat RT|tat RNaseH|tat INT|tat
Chr11_8225656_8237385	Gypsy	del	+	GAG|del AP|del RT|del RNaseH|del INT|del CHR|retroelement
Chr11_8251146_8260518	Gypsy	del	+	GAG|del AP|del RT|del RNaseH|del INT|del CHR|retroelement
Chr11_8491797_8503082	Gypsy	tat	+	GAG|tat AP|tat RT|tat RNaseH|tat INT|tat
Chr11_8886233_8898237	Gypsy	del	+	GAG|del AP|del RT|del RNaseH|del INT|del CHR|retroelement
Chr11_917402_927833	Gypsy	del	+	GAG|del AP|del RT|del RNaseH|del INT|del CHR|retroelement
Chr11_9206913_9212616	Copia	tork	+	GAG|tork AP|tork INT|tork RT|tork RNaseH|tork
Chr11_9335920_9348725	Gypsy	tat	+	GAG|tat AP|tat RT|tat RNaseH|tat INT|tat
Chr11_9354861_9367871	Gypsy	del	+	GAG|del AP|del RT|del RNaseH|del INT|del CHR|retroelement
Chr11_9516952_9531407	Gypsy	tat	+	GAG|tat AP|tat RT|tat RNaseH|tat INT|tat
Chr11_9697128_9701786	Copia	tork	+	GAG|tork AP|tork INT|tork RT|tork RNaseH|tork
Chr11_975305_984915	Copia	sire	+	GAG|sire AP|sire INT|sire RT|sire RNaseH|sire
Chr12_10023741_10037549	Gypsy	del	+	GAG|del AP|del RT|del RNaseH|del INT|del CHR|retroelement
Chr12_10156807_10168086	Gypsy	tat	+	GAG|tat AP|tat RT|tat RNaseH|tat INT|tat
Chr12_10324979_10336468	Gypsy	del	+	GAG|del AP|del RT|del RNaseH|del INT|del CHR|retroelement
Chr12_10390082_10395551	Gypsy	reina	+	GAG|reina AP|reina RT|reina RNaseH|reina INT|reina
Chr12_10534390_10540612	Copia	tork	+	GAG|tork AP|tork INT|tork RT|tork RNaseH|tork
Chr12_11047466_11053061	Copia	oryco	+	GAG|oryco AP|oryco INT|oryco RT|oryco RNaseH|oryco
Chr12_11113266_11123462	Gypsy	del	+	GAG|del AP|del RT|del RNaseH|del INT|del CHR|retroelement
Chr12_11474397_11486380	Gypsy	del	+	GAG|del AP|del RT|del RNaseH|del INT|del CHR|retroelement
Chr12_11497837_11508582	Gypsy	del	+	GAG|del AP|del RT|del RNaseH|del INT|del CHR|retroelement
Chr12_11552508_11561150	Gypsy	crm	+	GAG|crm AP|crm RT|crm RNaseH|crm INT|crm
Chr12_11687711_11701332	Gypsy	del	+	GAG|del AP|del RT|del RNaseH|del INT|del CHR|retroelement
Chr12_11778783_11788989	Gypsy	tat	+	GAG|tat AP|tat RT|tat RNaseH|tat INT|tat
Chr12_11800025_11808554	Gypsy	tat	+	GAG|tat AP|tat RT|tat RNaseH|tat INT|tat
Chr12_11936886_11946307	Gypsy	del	+	GAG|del AP|del RT|del RNaseH|del INT|del CHR|retroelement
Chr12_12154398_12164484	Gypsy	del	+	GAG|del AP|del RT|del RNaseH|del INT|del CHR|retroelement
Chr12_12245727_12257024	Gypsy	tat	+	GAG|tat AP|tat RT|tat RNaseH|tat INT|tat
Chr12_12284706_12293913	Copia	tork	+	GAG|tork AP|tork INT|tork RT|tork RNaseH|tork
Chr12_12510176_12524020	Gypsy	tat	+	GAG|tat AP|tat RT|tat RNaseH|tat INT|tat
Chr12_12534040_12546117	Gypsy	del	+	GAG|del AP|del RT|del RNaseH|del INT|del CHR|retroelement
Chr12_12681671_12688094	Copia	tork	+	GAG|tork AP|tork INT|tork RT|tork RNaseH|tork
Chr12_1275800_1281818	Copia	tork	+	GAG|tork AP|tork INT|tork RT|tork RNaseH|tork
Chr12_12770841_12779448	Gypsy	crm	+	GAG|crm AP|crm RT|crm RNaseH|crm INT|crm
Chr12_12809769_12823948	Gypsy	tat	+	AP|tat RT|tat RNaseH|tat INT|tat
Chr12_12825095_12831852	Copia	sire	+	GAG|sire AP|sire INT|sire RT|sire RNaseH|sire
Chr12_12993089_13005176	Gypsy	del	+	GAG|del AP|del RT|del RNaseH|del INT|del CHR|retroelement
Chr12_13031148_13046854	Gypsy	del	+	GAG|del AP|del RT|del RNaseH|del INT|del CHR|retroelement
Chr12_13080316_13088862	Gypsy	del	+	GAG|del AP|del RT|del RNaseH|del INT|del
Chr12_13128661_13139945	Gypsy	tat	+	GAG|tat AP|tat RT|tat RNaseH|tat INT|tat
Chr12_13200547_13205123	Copia	tork	+	GAG|tork AP|tork INT|tork RT|tork RNaseH|tork
Chr12_13253698_13262929	Gypsy	del	+	GAG|del AP|del RT|del RNaseH|del INT|del CHR|retroelement
Chr12_13358625_13370726	Gypsy	del	+	GAG|del AP|del RT|del RNaseH|del INT|del CHR|retroelement
Chr12_13461933_13467899	Copia	tork	+	GAG|tork AP|tork INT|tork RT|tork RNaseH|tork
Chr12_13588415_13599698	Gypsy	tat	+	GAG|tat AP|tat RT|tat RNaseH|tat INT|tat
Chr12_13631015_13639803	Gypsy	tat	+	AP|tat RT|tat RNaseH|tat INT|tat
Chr12_13666178_13671650	Gypsy	reina	+	GAG|reina AP|reina RT|reina RNaseH|reina INT|reina
Chr12_13711921_13722141	Gypsy	del	+	GAG|del AP|del RT|del RNaseH|del INT|del CHR|retroelement
Chr12_13855526_13863706	Copia	oryco	+	GAG|oryco AP|oryco INT|oryco RT|oryco RNaseH|oryco
Chr12_13893517_13905003	Gypsy	del	+	GAG|del AP|del RT|del RNaseH|del INT|del CHR|retroelement
Chr12_14078650_14087000	Copia	sire	+	GAG|sire AP|sire INT|sire RT|sire RNaseH|sire
Chr12_14146914_14154753	Copia	tork	+	GAG|tork AP|tork INT|tork RT|tork RNaseH|tork
Chr12_14167503_14172151	Copia	retrofit	+	GAG|retrofit AP|retrofit INT|retrofit RT|retrofit RNaseH|retrofit
Chr12_14211599_14216625	Gypsy	mixture	+	GAG|reina AP|del RT|reina RNaseH|reina INT|reina
Chr12_14242484_14256336	Gypsy	tat	+	AP|tat RT|tat RNaseH|tat INT|tat
Chr12_14471215_14477654	Copia	tork	+	GAG|tork AP|tork INT|tork RT|tork RNaseH|tork
Chr12_15022324_15032223	Gypsy	del	+	GAG|del AP|del RT|del RNaseH|del INT|del CHR|retroelement
Chr12_15049078_15054191	Copia	tork	+	GAG|tork AP|tork INT|tork RT|tork RNaseH|tork
Chr12_15228098_15237560	Copia	sire	+	GAG|sire AP|sire INT|sire RT|sire RNaseH|sire
Chr12_15265608_15274154	Copia	sire	+	GAG|sire AP|sire INT|sire RT|sire RNaseH|sire
Chr12_15362301_15369815	Gypsy	del	+	GAG|del AP|del RT|del RNaseH|del INT|del
Chr12_15423606_15433208	Copia	sire	+	GAG|sire AP|sire INT|sire RT|sire RNaseH|sire
Chr12_15523355_15531939	Copia	sire	+	GAG|sire AP|sire INT|sire RT|sire RNaseH|sire
Chr12_15578482_15590491	Gypsy	del	+	GAG|del AP|del RT|del RNaseH|del INT|del CHR|retroelement
Chr12_15604304_15615519	Copia	sire	+	GAG|sire AP|sire INT|sire RT|sire RNaseH|sire
Chr12_15691475_15704088	Gypsy	del	+	GAG|del AP|del RT|del RNaseH|del INT|del CHR|retroelement
Chr12_15879625_15886261	Copia	tork	+	GAG|tork AP|tork INT|tork RT|tork RNaseH|tork
Chr12_15929340_15941420	Gypsy	del	+	GAG|del AP|del RT|del RNaseH|del INT|del CHR|retroelement
Chr12_16180139_16190047	Gypsy	del	+	GAG|del AP|del RT|del RNaseH|del INT|del CHR|retroelement
Chr12_16331964_16343315	Gypsy	tat	+	GAG|tat AP|tat RT|tat RNaseH|tat INT|tat
Chr12_16350861_16357103	Copia	tork	+	GAG|tork AP|tork INT|tork RT|tork RNaseH|tork
Chr12_16435215_16446406	Gypsy	del	+	GAG|del AP|del RT|del RNaseH|del INT|del CHR|retroelement
Chr12_16642622_16653921	Gypsy	tat	+	GAG|tat AP|tat RT|tat RNaseH|tat INT|tat
Chr12_16665094_16676826	Gypsy	del	+	GAG|del AP|del RT|del RNaseH|del INT|del CHR|retroelement
Chr12_16821083_16833645	Gypsy	del	+	GAG|del AP|del RT|del RNaseH|del INT|del CHR|retroelement
Chr12_17090057_17102161	Gypsy	del	+	GAG|del AP|del RT|del RNaseH|del INT|del CHR|retroelement
Chr12_17142527_17153922	Gypsy	del	+	GAG|del AP|del RT|del RNaseH|del INT|del CHR|retroelement
Chr12_17222146_17235012	Gypsy	del	+	GAG|del AP|del RT|del RNaseH|del INT|del CHR|retroelement
Chr12_17241567_17253320	Gypsy	del	+	GAG|del AP|del RT|del RNaseH|del INT|del CHR|retroelement
Chr12_17283315_17294621	Gypsy	tat	+	GAG|tat AP|tat RT|tat RNaseH|tat INT|tat
Chr12_17368929_17374687	Copia	tork	+	GAG|tork AP|tork INT|tork RT|tork RNaseH|tork
Chr12_17427016_17435650	Copia	sire	+	GAG|sire AP|sire INT|sire RT|sire RNaseH|sire
Chr12_18184625_18190857	Copia	tork	+	GAG|tork AP|tork INT|tork RT|tork RNaseH|tork
Chr12_18220372_18233210	Gypsy	tat	+	GAG|tat AP|tat RT|tat RNaseH|tat INT|tat
Chr12_1823450_1829682	Copia	tork	+	GAG|tork AP|tork INT|tork RT|tork RNaseH|tork
Chr12_18240863_18253012	Gypsy	del	+	GAG|del AP|del RT|del RNaseH|del INT|del CHR|retroelement
Chr12_18671517_18684204	Gypsy	del	+	GAG|del AP|del RT|del RNaseH|del INT|del CHR|retroelement
Chr12_18771930_18783250	Gypsy	tat	+	GAG|tat AP|tat RT|tat RNaseH|tat INT|tat
Chr12_18808297_18820318	Gypsy	del	+	GAG|del AP|del RT|del RNaseH|del INT|del CHR|retroelement
Chr12_18994245_19006824	Gypsy	del	+	GAG|del AP|del RT|del RNaseH|del INT|del CHR|retroelement
Chr12_19233055_19237689	Copia	tork	+	GAG|tork AP|tork INT|tork RT|tork RNaseH|tork
Chr12_19549941_19561000	Gypsy	tat	+	GAG|tat AP|tat RT|tat RNaseH|tat INT|tat
Chr12_1955696_1961926	Copia	tork	+	GAG|tork AP|tork INT|tork RT|tork RNaseH|tork
Chr12_19813913_19825941	Gypsy	del	+	GAG|del AP|del RT|del RNaseH|del INT|del CHR|retroelement
Chr12_19936573_19947806	Gypsy	tat	+	GAG|tat AP|tat RT|tat RNaseH|tat INT|tat
Chr12_20128221_20133682	Gypsy	mixture	+	GAG|reina AP|reina RT|reina RNaseH|reina INT|reina CHR|retroelement
Chr12_20256500_20267891	Gypsy	tat	+	GAG|tat AP|tat RT|tat RNaseH|tat INT|tat
Chr12_20333639_20344093	Gypsy	del	+	GAG|del AP|del RT|del RNaseH|del INT|del CHR|retroelement
Chr12_20437901_20448698	Gypsy	del	+	GAG|del AP|del RT|del RNaseH|del INT|del CHR|retroelement
Chr12_2048755_2060128	Gypsy	del	+	GAG|del AP|del RT|del RNaseH|del INT|del CHR|retroelement
Chr12_20590729_20602807	Gypsy	del	+	GAG|del AP|del RT|del RNaseH|del INT|del CHR|retroelement
Chr12_20715986_20728070	Gypsy	del	+	GAG|del AP|del RT|del RNaseH|del INT|del CHR|retroelement
Chr12_20957966_20964346	Copia	tork	+	GAG|tork AP|tork INT|tork RT|tork RNaseH|tork
Chr12_21026711_21037783	Gypsy	del	+	GAG|del AP|del RT|del RNaseH|del INT|del CHR|retroelement
Chr12_2103924_2116910	Gypsy	del	+	GAG|del AP|del RT|del RNaseH|del INT|del CHR|retroelement
Chr12_21064444_21070183	Copia	tork	+	GAG|tork AP|tork INT|tork RT|tork RNaseH|tork
Chr12_21085529_21100095	Gypsy	tat	+	GAG|tat AP|tat RT|tat RNaseH|tat INT|tat
Chr12_21105488_21110213	Copia	tork	+	GAG|tork AP|tork INT|tork RT|tork RNaseH|tork
Chr12_21273152_21278681	Copia	oryco	+	GAG|oryco AP|oryco INT|oryco RT|oryco RNaseH|oryco
Chr12_21357081_21368090	Gypsy	del	+	GAG|del AP|del RT|del RNaseH|del INT|del CHR|retroelement
Chr12_21810622_21816848	Copia	tork	+	GAG|tork AP|tork INT|tork RT|tork RNaseH|tork
Chr12_21824822_21829897	Copia	tork	+	GAG|tork AP|tork INT|tork RT|tork RNaseH|tork
Chr12_21950245_21958392	Gypsy	del	+	GAG|del AP|del RT|del RNaseH|del INT|del CHR|retroelement
Chr12_22887606_22901591	Gypsy	del	+	GAG|del AP|del RT|del RNaseH|del INT|del CHR|retroelement
Chr12_22923440_22934762	Gypsy	tat	+	GAG|tat AP|tat RT|tat RNaseH|tat INT|tat
Chr12_22982951_22995818	Gypsy	tat	+	GAG|tat AP|tat RT|tat RNaseH|tat INT|tat
Chr12_23149360_23155102	Copia	oryco	+	GAG|oryco AP|oryco INT|oryco RT|oryco RNaseH|oryco
Chr12_23359599_23375310	Gypsy	del	+	GAG|del AP|del RT|del RNaseH|del INT|del CHR|retroelement
Chr12_23504508_23511715	Copia	tork	+	GAG|tork AP|tork INT|tork RT|tork RNaseH|tork
Chr12_2370141_2375381	Copia	mixture	+	GAG|retrofit AP|ty1/copia INT|retrofit RT|tork RNaseH|retrofit
Chr12_24129681_24136097	Copia	tork	+	GAG|tork AP|tork INT|tork RT|tork RNaseH|tork
Chr12_24162745_24172521	Gypsy	tat	+	GAG|tat AP|tat RT|tat RNaseH|tat INT|tat
Chr12_24419456_24432088	Gypsy	tat	+	GAG|tat AP|tat RT|tat RNaseH|tat INT|tat
Chr12_24438549_24449841	Gypsy	tat	+	GAG|tat AP|tat RT|tat RNaseH|tat INT|tat
Chr12_24577735_24583970	Copia	tork	+	GAG|tork AP|tork INT|tork RT|tork RNaseH|tork
Chr12_24767170_24772923	Copia	oryco	+	GAG|oryco AP|oryco INT|oryco RT|oryco RNaseH|oryco
Chr12_2509207_2520641	Gypsy	tat	+	GAG|tat AP|tat RT|tat RNaseH|tat INT|tat
Chr12_2527372_2532296	Copia	oryco	+	GAG|oryco AP|oryco INT|oryco RT|oryco RNaseH|oryco
Chr12_25433599_25439979	Copia	tork	+	GAG|tork AP|tork INT|tork RT|tork RNaseH|tork
Chr12_2552925_2561968	Copia	sire	+	GAG|sire AP|sire INT|sire RT|sire RNaseH|sire
Chr12_26516521_26529465	Gypsy	tat	+	GAG|tat AP|tat RT|tat RNaseH|tat INT|tat
Chr12_26733208_26744815	Gypsy	del	+	GAG|del AP|del RT|del RNaseH|del INT|del CHR|retroelement
Chr12_26829256_26839282	Gypsy	del	+	GAG|del AP|del RT|del RNaseH|del INT|del CHR|retroelement
Chr12_27219929_27225578	Gypsy	reina	+	GAG|reina AP|reina RT|reina RNaseH|reina INT|reina
Chr12_283281_289637	Copia	tork	+	GAG|tork AP|tork INT|tork RT|tork RNaseH|tork
Chr12_3191599_3199930	Copia	tork	+	GAG|tork AP|tork INT|tork RT|tork RNaseH|tork
Chr12_3256496_3271071	Gypsy	tat	+	GAG|tat AP|tat RT|tat RNaseH|tat INT|tat
Chr12_4011803_4017021	Copia	oryco	+	GAG|oryco AP|oryco INT|oryco RT|oryco RNaseH|oryco
Chr12_4289706_4300862	Gypsy	tat	+	AP|tat RT|tat RNaseH|tat INT|tat
Chr12_4309192_4322202	Gypsy	tat	+	GAG|tat AP|tat RT|tat RNaseH|tat INT|tat
Chr12_4375332_4385822	Gypsy	del	+	GAG|del AP|del RT|del RNaseH|del INT|del CHR|retroelement
Chr12_45350_50551	Copia	oryco	+	GAG|oryco AP|oryco INT|oryco RT|oryco RNaseH|oryco
Chr12_478139_483329	Copia	oryco	+	GAG|oryco AP|oryco INT|oryco RT|oryco RNaseH|oryco
Chr12_4851241_4856942	Copia	oryco	+	GAG|oryco AP|oryco INT|oryco RT|oryco RNaseH|oryco
Chr12_4925610_4931706	Copia	tork	+	GAG|tork AP|tork INT|tork RT|tork RNaseH|tork
Chr12_4968251_4981968	Gypsy	tat	+	GAG|tat AP|tat RT|tat RNaseH|tat INT|tat
Chr12_5190375_5201236	Gypsy	tat	+	AP|tat RT|tat RNaseH|tat INT|tat
Chr12_5226961_5238260	Gypsy	tat	+	GAG|tat AP|tat RT|tat RNaseH|tat INT|tat
Chr12_5288317_5299876	Gypsy	tat	+	GAG|tat AP|tat RT|tat RNaseH|tat INT|tat
Chr12_5559019_5564864	Copia	tork	+	GAG|tork AP|tork INT|tork RT|tork RNaseH|tork
Chr12_5895101_5900860	Copia	oryco	+	GAG|oryco AP|oryco INT|oryco RT|oryco RNaseH|oryco
Chr12_5976240_5985872	Gypsy	del	+	GAG|del AP|del RT|del RNaseH|del INT|del CHR|retroelement
Chr12_6078901_6088284	Gypsy	del	+	GAG|del AP|del RT|del RNaseH|del INT|del CHR|retroelement
Chr12_6192594_6207560	Gypsy	tat	+	GAG|tat AP|tat RT|tat RNaseH|tat INT|tat
Chr12_6316836_6322158	Gypsy	mixture	+	GAG|reina AP|reina RT|reina RNaseH|reina INT|reina CHR|retroelement
Chr12_6360386_6365890	Copia	tork	+	GAG|tork AP|tork INT|tork RT|tork RNaseH|tork
Chr12_6407317_6419302	Gypsy	del	+	GAG|del AP|del RT|del RNaseH|del INT|del CHR|retroelement
Chr12_6477243_6488571	Gypsy	tat	+	AP|tat RT|tat RNaseH|tat INT|tat
Chr12_6550421_6556592	Copia	tork	+	GAG|tork AP|tork INT|tork RT|tork RNaseH|tork
Chr12_6659632_6672477	Gypsy	tat	+	GAG|tat AP|tat RT|tat RNaseH|tat INT|tat
Chr12_6681369_6687606	Copia	tork	+	GAG|tork AP|tork INT|tork RT|tork RNaseH|tork
Chr12_6781186_6789768	Gypsy	tat	+	AP|tat RT|tat RNaseH|tat INT|tat
Chr12_6833416_6846043	Gypsy	del	+	GAG|del AP|del RT|del RNaseH|del INT|del CHR|retroelement
Chr12_7787669_7793380	Copia	tork	+	GAG|tork AP|tork INT|tork RT|tork RNaseH|tork
Chr12_8114609_8125927	Gypsy	tat	+	GAG|tat AP|tat RT|tat RNaseH|tat INT|tat
Chr12_8209438_8221940	Gypsy	del	+	GAG|del AP|del RT|del RNaseH|del INT|del CHR|retroelement
Chr12_8247506_8258781	Gypsy	del	+	GAG|del AP|del RT|del RNaseH|del INT|del CHR|retroelement
Chr12_8436755_8442597	Copia	retrofit	+	GAG|retrofit AP|retrofit INT|retrofit RT|retrofit RNaseH|retrofit
Chr12_8461611_8477002	Gypsy	del	+	GAG|del AP|del RT|del RNaseH|del INT|del CHR|retroelement
Chr12_8611436_8622397	Gypsy	del	+	GAG|del AP|del RT|del RNaseH|del INT|del CHR|retroelement
Chr12_8714962_8724036	Copia	tork	+	GAG|tork AP|tork INT|tork RT|tork RNaseH|tork
Chr12_8761568_8769391	Gypsy	crm	+	GAG|crm AP|crm RT|crm RNaseH|crm INT|crm
Chr12_8948672_8955285	Copia	sire	+	GAG|sire AP|sire INT|sire RT|sire RNaseH|sire
Chr12_8964187_8976171	Gypsy	tat	+	GAG|tat AP|tat RT|tat RNaseH|tat INT|tat
Chr12_8988095_8997931	Gypsy	del	+	GAG|del AP|del RT|del RNaseH|del INT|del CHR|retroelement
Chr12_9005223_9013699	Gypsy	reina	+	GAG|reina AP|reina RT|reina RNaseH|reina INT|reina
Chr12_9048241_9059626	Gypsy	tat	+	AP|tat RT|tat RNaseH|tat INT|tat
Chr12_9138166_9148855	Gypsy	del	+	GAG|del AP|del RT|del RNaseH|del INT|del CHR|retroelement
Chr12_9413313_9427685	Gypsy	tat	+	GAG|tat AP|tat RT|tat RNaseH|tat INT|tat
Chr12_9573611_9578111	Copia	tork	+	GAG|tork AP|tork INT|tork RT|tork RNaseH|tork
Chr12_9588320_9593839	Copia	tork	+	GAG|tork AP|tork INT|tork RT|tork RNaseH|tork
Chr12_9845581_9856885	Gypsy	tat	+	GAG|tat AP|tat RT|tat RNaseH|tat INT|tat
Chr12_9998181_10009991	Gypsy	tat	+	GAG|tat AP|tat RT|tat RNaseH|tat INT|tat
Chr1_10537615_10548449	Gypsy	tat	+	GAG|tat AP|tat RT|tat RNaseH|tat INT|tat
Chr1_106522_118081	Gypsy	del	+	GAG|del AP|del RT|del RNaseH|del INT|del CHR|retroelement
Chr1_10731667_10742490	Gypsy	del	+	GAG|del AP|del RT|del RNaseH|del INT|del CHR|retroelement
Chr1_10784386_10797432	Gypsy	del	+	GAG|del AP|del RT|del RNaseH|del INT|del CHR|retroelement
Chr1_10852352_10864928	Gypsy	tat	+	GAG|tat AP|tat RT|tat RNaseH|tat INT|tat
Chr1_10951569_10957819	Copia	tork	+	GAG|tork AP|tork INT|tork RT|tork RNaseH|tork
Chr1_11141626_11152912	Gypsy	tat	+	GAG|tat AP|tat RT|tat RNaseH|tat INT|tat
Chr1_11830989_11839798	Gypsy	tat	+	AP|tat RT|tat RNaseH|tat INT|tat
Chr1_12409234_12414455	Copia	retrofit	+	GAG|retrofit AP|retrofit INT|retrofit RT|retrofit RNaseH|retrofit
Chr1_12454827_12465625	Gypsy	del	+	GAG|del AP|del RT|del RNaseH|del INT|del CHR|retroelement
Chr1_12598069_12610974	Gypsy	tat	+	GAG|tat AP|tat RT|tat RNaseH|tat INT|tat
Chr1_12860926_12867167	Copia	tork	+	GAG|tork AP|tork INT|tork RT|tork RNaseH|tork
Chr1_12948190_12960273	Gypsy	del	+	GAG|del AP|del RT|del RNaseH|del INT|del CHR|retroelement
Chr1_13076301_13089791	Gypsy	tat	+	AP|tat RT|tat RNaseH|tat INT|tat
Chr1_13220153_13235048	Gypsy	tat	+	AP|tat RT|tat RNaseH|tat INT|tat
Chr1_13447624_13452994	Gypsy	reina	+	GAG|reina AP|reina RT|reina RNaseH|reina INT|reina
Chr1_13963282_13970842	Copia	sire	+	GAG|sire AP|sire INT|sire RT|sire RNaseH|sire
Chr1_13997417_14008507	Copia	sire	+	GAG|sire AP|sire INT|sire RT|sire RNaseH|sire
Chr1_14535191_14543736	Gypsy	tat	+	GAG|tat AP|tat RT|tat RNaseH|tat INT|tat
Chr1_14660486_14672308	Gypsy	del	+	GAG|del AP|del RT|del RNaseH|del INT|del CHR|retroelement
Chr1_14870340_14876615	Copia	tork	+	GAG|tork AP|tork INT|tork RT|tork RNaseH|tork
Chr1_15242454_15253370	Gypsy	del	+	GAG|del AP|del RT|del RNaseH|del INT|del
Chr1_15301544_15307713	Copia	tork	+	GAG|tork AP|tork INT|tork RT|tork RNaseH|tork
Chr1_15516783_15529207	Gypsy	tat	+	GAG|tat AP|tat RT|tat RNaseH|tat INT|tat
Chr1_15864701_15876640	Gypsy	del	+	GAG|del AP|del RT|del RNaseH|del INT|del CHR|retroelement
Chr1_16211895_16224360	Gypsy	del	+	GAG|del AP|del RT|del RNaseH|del INT|del CHR|retroelement
Chr1_16399668_16413859	Gypsy	tat	+	AP|tat RT|tat RNaseH|tat INT|tat
Chr1_16437326_16442436	Gypsy	reina	+	GAG|reina AP|reina RT|reina RNaseH|reina INT|reina
Chr1_16548672_16562653	Gypsy	del	+	GAG|del AP|del RT|del RNaseH|del INT|del CHR|retroelement
Chr1_16618252_16629262	Gypsy	del	+	GAG|del AP|del RT|del RNaseH|del INT|del CHR|retroelement
Chr1_16759730_16767494	Gypsy	crm	+	GAG|crm AP|crm RT|crm RNaseH|crm INT|crm
Chr1_17051362_17063891	Gypsy	del	+	GAG|del AP|del RT|del RNaseH|del INT|del CHR|retroelement
Chr1_17090379_17100285	Gypsy	del	+	GAG|del AP|del RT|del RNaseH|del INT|del CHR|retroelement
Chr1_17231521_17240326	Copia	tork	+	GAG|tork AP|tork INT|tork RT|tork RNaseH|tork
Chr1_17358230_17369531	Gypsy	tat	+	GAG|tat AP|tat RT|tat RNaseH|tat INT|tat
Chr1_17436258_17442516	Copia	tork	+	GAG|tork AP|tork INT|tork RT|tork RNaseH|tork
Chr1_17524385_17531788	Gypsy	crm	+	GAG|crm AP|crm RT|crm RNaseH|crm INT|crm
Chr1_17634711_17644883	Gypsy	del	+	GAG|del AP|del RT|del RNaseH|del INT|del CHR|retroelement
Chr1_17666056_17674495	Copia	sire	+	GAG|sire AP|sire INT|sire RT|sire RNaseH|sire
Chr1_17699915_17705442	Copia	mixture	+	AP|ty1/copia INT|retrofit RT|tork RNaseH|retrofit
Chr1_17819752_17833676	Gypsy	tat	+	GAG|tat AP|tat RT|tat RNaseH|tat INT|tat
Chr1_18115826_18122681	Copia	tork	+	GAG|tork AP|tork INT|tork RT|tork RNaseH|tork
Chr1_18288213_18295930	Gypsy	crm	+	GAG|crm AP|crm RT|crm RNaseH|crm INT|crm
Chr1_18308353_18319968	Gypsy	del	+	GAG|del AP|del RT|del RNaseH|del INT|del CHR|retroelement
Chr1_18358454_18364335	Copia	tork	+	GAG|tork AP|tork INT|tork RT|tork RNaseH|tork
Chr1_18876095_18887127	Gypsy	del	+	GAG|del AP|del RT|del RNaseH|del INT|del CHR|retroelement
Chr1_18910167_18918740	Gypsy	tat	+	GAG|tat AP|tat RT|tat RNaseH|tat INT|tat
Chr1_19015824_19020841	Copia	mixture	+	AP|ty1/copia INT|retrofit RT|tork RNaseH|retrofit
Chr1_19210696_19226240	Gypsy	tat	+	GAG|tat AP|tat RT|tat RNaseH|tat INT|tat
Chr1_19235427_19240456	Copia	tork	+	GAG|tork AP|tork INT|tork RT|tork RNaseH|tork
Chr1_19412846_19423646	Gypsy	del	+	GAG|del AP|del RT|del RNaseH|del INT|del CHR|retroelement
Chr1_19440238_19451648	Gypsy	del	+	GAG|del AP|del RT|del RNaseH|del INT|del CHR|retroelement
Chr1_19790414_19801717	Gypsy	tat	+	GAG|tat AP|tat RT|tat RNaseH|tat INT|tat
Chr1_19834603_19843697	Gypsy	tat	+	AP|tat RT|tat RNaseH|tat INT|tat
Chr1_19936058_19948155	Gypsy	del	+	GAG|del AP|del RT|del RNaseH|del INT|del CHR|retroelement
Chr1_19999261_20011364	Gypsy	del	+	GAG|del AP|del RT|del RNaseH|del INT|del CHR|retroelement
Chr1_20158735_20170498	Gypsy	del	+	GAG|del AP|del RT|del RNaseH|del INT|del CHR|retroelement
Chr1_20219982_20231322	Gypsy	tat	+	GAG|tat AP|tat RT|tat RNaseH|tat INT|tat
Chr1_20365408_20371622	Copia	tork	+	GAG|tork AP|tork INT|tork RT|tork RNaseH|tork
Chr1_20611262_20617527	Copia	tork	+	GAG|tork AP|tork INT|tork RT|tork RNaseH|tork
Chr1_20672893_20684990	Gypsy	del	+	GAG|del AP|del RT|del RNaseH|del INT|del CHR|retroelement
Chr1_20792823_20804143	Gypsy	tat	+	GAG|tat AP|tat RT|tat RNaseH|tat INT|tat
Chr1_21048201_21054483	Copia	tork	+	GAG|tork AP|tork INT|tork RT|tork RNaseH|tork
Chr1_21582654_21592939	Gypsy	del	+	GAG|del AP|del RT|del RNaseH|del INT|del CHR|retroelement
Chr1_21950022_21955961	Gypsy	mixture	+	GAG|reina AP|reina RT|reina RNaseH|reina INT|reina CHR|retroelement
Chr1_22050677_22060867	Gypsy	del	+	GAG|del AP|del RT|del RNaseH|del INT|del
Chr1_22294965_22301206	Copia	tork	+	GAG|tork AP|tork INT|tork RT|tork RNaseH|tork
Chr1_22400917_22412378	Gypsy	tat	+	AP|tat RT|tat RNaseH|tat INT|tat
Chr1_22508720_22520663	Gypsy	del	+	GAG|del AP|del RT|del RNaseH|del INT|del CHR|retroelement
Chr1_23502779_23508534	Copia	tork	+	GAG|tork AP|tork INT|tork RT|tork RNaseH|tork
Chr1_2440476_2445548	Copia	tork	+	GAG|tork AP|tork INT|tork RT|tork RNaseH|tork
Chr1_24679028_24687653	Copia	tork	+	GAG|tork AP|tork INT|tork RT|tork RNaseH|tork
Chr1_24774794_24779567	Copia	retrofit	+	GAG|retrofit AP|retrofit INT|retrofit RT|retrofit RNaseH|retrofit
Chr1_2505283_2511359	Copia	tork	+	GAG|tork AP|tork INT|tork RT|tork RNaseH|tork
Chr1_25168279_25179011	Copia	sire	+	AP|sire INT|sire RT|sire RNaseH|sire
Chr1_25303308_25311805	Gypsy	tat	+	GAG|tat AP|tat RT|tat RNaseH|tat INT|tat
Chr1_25566858_25573312	Copia	tork	+	GAG|tork AP|tork INT|tork RT|tork RNaseH|tork
Chr1_25653448_25664752	Gypsy	tat	+	GAG|tat AP|tat RT|tat RNaseH|tat INT|tat
Chr1_25709267_25714504	Gypsy	mixture	+	GAG|reina AP|reina RT|reina RNaseH|reina INT|reina CHR|retroelement
Chr1_25725764_25737337	Gypsy	del	+	GAG|del AP|del RT|del RNaseH|del INT|del
Chr1_25804398_25815582	Gypsy	del	+	GAG|del AP|del RT|del RNaseH|del INT|del CHR|retroelement
Chr1_26542779_26557892	Gypsy	del	+	GAG|del AP|del RT|del RNaseH|del INT|del CHR|retroelement
Chr1_26848661_26861532	Gypsy	tat	+	GAG|tat AP|tat RT|tat RNaseH|tat INT|tat
Chr1_26942852_26954867	Gypsy	del	+	GAG|del AP|del RT|del RNaseH|del INT|del CHR|retroelement
Chr1_27786151_27800057	Gypsy	tat	+	GAG|tat AP|tat RT|tat RNaseH|tat INT|tat
Chr1_27899255_27905485	Copia	tork	+	GAG|tork AP|tork INT|tork RT|tork RNaseH|tork
Chr1_28337720_28342905	Copia	oryco	+	GAG|oryco AP|oryco INT|oryco RT|oryco RNaseH|oryco
Chr1_28712401_28724798	Gypsy	tat	+	GAG|tat AP|tat RT|tat RNaseH|tat INT|tat
Chr1_28840197_28846434	Copia	tork	+	GAG|tork AP|tork INT|tork RT|tork RNaseH|tork
Chr1_28996342_29007321	Gypsy	del	+	GAG|del AP|del RT|del RNaseH|del INT|del CHR|retroelement
Chr1_31019517_31031058	Gypsy	del	+	GAG|del AP|del RT|del RNaseH|del INT|del CHR|retroelement
Chr1_31122312_31127327	Copia	mixture	+	AP|ty1/copia INT|retrofit RT|tork RNaseH|retrofit
Chr1_31138202_31151890	Gypsy	tat	+	GAG|tat AP|tat RT|tat RNaseH|tat INT|tat
Chr1_31234275_31239063	Copia	retrofit	+	GAG|retrofit AP|retrofit INT|retrofit RT|retrofit RNaseH|retrofit
Chr1_3205272_3219093	Gypsy	del	+	GAG|del AP|del RT|del RNaseH|del INT|del CHR|retroelement
Chr1_3229893_3235692	Copia	tork	+	GAG|tork AP|tork INT|tork RT|tork RNaseH|tork
Chr1_33427036_33440843	Gypsy	tat	+	GAG|tat AP|tat RT|tat RNaseH|tat INT|tat
Chr1_33850344_33861900	Gypsy	del	+	GAG|del AP|del RT|del RNaseH|del INT|del CHR|retroelement
Chr1_33979931_33988969	Copia	tork	+	GAG|tork AP|tork INT|tork RT|tork RNaseH|tork
Chr1_34048079_34062321	Gypsy	del	+	GAG|del AP|del RT|del RNaseH|del INT|del CHR|retroelement
Chr1_34204362_34217212	Copia	sire	+	GAG|sire AP|sire INT|sire RT|sire RNaseH|sire
Chr1_34589750_34596029	Copia	tork	+	GAG|tork AP|tork INT|tork RT|tork RNaseH|tork
Chr1_34970462_34976124	Gypsy	reina	+	GAG|reina AP|reina RT|reina RNaseH|reina INT|reina
Chr1_35277695_35289769	Gypsy	del	+	GAG|del AP|del RT|del RNaseH|del INT|del CHR|retroelement
Chr1_35443188_35456625	Gypsy	del	+	GAG|del AP|del RT|del RNaseH|del INT|del CHR|retroelement
Chr1_36068255_36080268	Gypsy	tat	+	GAG|tat AP|tat RT|tat RNaseH|tat INT|tat
Chr1_36545251_36556317	Gypsy	del	+	GAG|del AP|del RT|del RNaseH|del INT|del CHR|retroelement
Chr1_36572894_36585388	Gypsy	del	+	GAG|del AP|del RT|del RNaseH|del INT|del CHR|retroelement
Chr1_36842837_36858452	Gypsy	del	+	GAG|del AP|del RT|del RNaseH|del INT|del
Chr1_37128132_37133007	Copia	retrofit	+	GAG|retrofit AP|retrofit INT|retrofit RT|retrofit RNaseH|retrofit
Chr1_37207144_37220586	Gypsy	del	+	GAG|del AP|del RT|del RNaseH|del INT|del CHR|retroelement
Chr1_37429060_37440072	Gypsy	tat	+	GAG|tat AP|tat RT|tat RNaseH|tat INT|tat
Chr1_38345513_38359036	Gypsy	tat	+	GAG|tat AP|tat RT|tat RNaseH|tat INT|tat
Chr1_38580954_38592239	Gypsy	tat	+	GAG|tat AP|tat RT|tat RNaseH|tat INT|tat
Chr1_38772251_38786807	Gypsy	tat	+	GAG|tat AP|tat RT|tat RNaseH|tat INT|tat
Chr1_39749685_39760756	Gypsy	del	+	GAG|del AP|del RT|del RNaseH|del INT|del CHR|retroelement
Chr1_40853070_40858187	Copia	oryco	+	GAG|oryco AP|oryco INT|oryco RT|oryco RNaseH|oryco
Chr1_41422820_41434470	Gypsy	del	+	GAG|del AP|del RT|del RNaseH|del INT|del CHR|retroelement
Chr1_41605064_41610579	Copia	mixture	+	AP|ty1/copia INT|retrofit RT|tork RNaseH|retrofit
Chr1_4186313_4192054	Copia	tork	+	GAG|tork AP|tork INT|tork RT|tork RNaseH|tork
Chr1_41992088_41996675	Copia	tork	+	GAG|tork AP|tork INT|tork RT|tork RNaseH|tork
Chr1_42507645_42520521	Gypsy	del	+	GAG|del AP|del RT|del RNaseH|del INT|del CHR|retroelement
Chr1_42527481_42532073	Copia	tork	+	GAG|tork AP|tork INT|tork RT|tork RNaseH|tork
Chr1_4469011_4483872	Gypsy	tat	+	GAG|tat AP|tat RT|tat RNaseH|tat INT|tat
Chr1_4598083_4611042	Gypsy	tat	+	GAG|tat AP|tat RT|tat RNaseH|tat INT|tat
Chr1_4776239_4781941	Copia	oryco	+	GAG|oryco AP|oryco INT|oryco RT|oryco RNaseH|oryco
Chr1_4932010_4943300	Gypsy	tat	+	GAG|tat AP|tat RT|tat RNaseH|tat INT|tat
Chr1_5736020_5741175	Gypsy	reina	+	AP|reina RT|reina RNaseH|reina INT|reina
Chr1_5961504_5966180	Copia	retrofit	+	GAG|retrofit AP|retrofit INT|retrofit RT|retrofit RNaseH|retrofit
Chr1_6161937_6167522	Copia	tork	+	GAG|tork AP|tork INT|tork RT|tork RNaseH|tork
Chr1_660820_671469	Gypsy	tat	+	GAG|tat AP|tat RT|tat RNaseH|tat INT|tat
Chr1_7634079_7644834	Gypsy	tat	+	GAG|tat AP|tat RT|tat RNaseH|tat INT|tat
Chr1_7749206_7754671	Gypsy	reina	+	GAG|reina AP|reina RT|reina RNaseH|reina INT|reina
Chr1_7823584_7838528	Gypsy	tat	+	GAG|tat AP|tat RT|tat RNaseH|tat INT|tat
Chr1_816127_831806	Gypsy	tat	+	GAG|tat AP|tat RT|tat RNaseH|tat INT|tat
Chr1_832967_839857	Copia	tork	+	GAG|tork AP|tork INT|tork RT|tork RNaseH|tork
Chr1_8822542_8827745	Copia	oryco	+	GAG|oryco AP|oryco INT|oryco RT|oryco RNaseH|oryco
Chr1_905437_910506	Copia	tork	+	GAG|tork AP|tork INT|tork RT|tork RNaseH|tork
Chr1_9214590_9220981	Copia	tork	+	GAG|tork AP|tork INT|tork RT|tork RNaseH|tork
Chr1_9531582_9544428	Gypsy	tat	+	GAG|tat AP|tat RT|tat RNaseH|tat INT|tat
Chr1_9574489_9580410	Copia	tork	+	GAG|tork AP|tork INT|tork RT|tork RNaseH|tork
Chr1_9619046_9624783	Copia	oryco	+	GAG|oryco AP|oryco INT|oryco RT|oryco RNaseH|oryco
Chr1_9835858_9846046	Gypsy	del	+	GAG|del AP|del RT|del RNaseH|del INT|del CHR|retroelement
Chr2_10230020_10235638	Copia	oryco	+	GAG|oryco AP|oryco INT|oryco RT|oryco RNaseH|oryco
Chr2_10297435_10308918	Gypsy	tat	+	AP|tat RT|tat RNaseH|tat INT|tat
Chr2_10599342_10610817	Gypsy	tat	+	GAG|tat AP|tat RT|tat RNaseH|tat INT|tat
Chr2_10622255_10628084	Copia	tork	+	GAG|tork AP|tork INT|tork RT|tork RNaseH|tork
Chr2_11082613_11093306	Copia	tork	+	GAG|tork AP|tork INT|tork RT|tork RNaseH|tork
Chr2_11134843_11147652	Gypsy	tat	+	GAG|tat AP|tat RT|tat RNaseH|tat INT|tat
Chr2_11250736_11259766	Gypsy	del	+	GAG|del AP|del RT|del RNaseH|del INT|del CHR|retroelement
Chr2_11274921_11289451	Gypsy	tat	+	GAG|tat AP|tat RT|tat RNaseH|tat INT|tat
Chr2_11453308_11462589	Copia	sire	+	GAG|sire AP|sire INT|sire RT|sire RNaseH|sire
Chr2_11537272_11548467	Gypsy	reina	+	GAG|reina AP|reina RT|reina RNaseH|reina INT|reina
Chr2_11674611_11682154	Gypsy	crm	+	GAG|crm AP|crm RT|crm RNaseH|crm INT|crm
Chr2_11786568_11795585	Gypsy	del	+	GAG|del AP|del RT|del RNaseH|del INT|del CHR|retroelement
Chr2_11897050_11902751	Copia	oryco	+	GAG|oryco AP|oryco INT|oryco RT|oryco RNaseH|oryco
Chr2_12068816_12079203	Copia	sire	+	GAG|sire AP|sire INT|sire RT|sire RNaseH|sire
Chr2_12133506_12138626	Copia	tork	+	GAG|tork AP|tork INT|tork RT|tork RNaseH|tork
Chr2_12155248_12164445	Gypsy	reina	+	AP|reina RT|reina RNaseH|reina INT|reina
Chr2_12167281_12179907	Gypsy	tat	+	GAG|tat AP|tat RT|tat RNaseH|tat INT|tat
Chr2_12279321_12290626	Gypsy	tat	+	GAG|tat AP|tat RT|tat RNaseH|tat INT|tat
Chr2_12479161_12485012	Copia	tork	+	GAG|tork AP|tork INT|tork RT|tork RNaseH|tork
Chr2_1252064_1257546	Copia	tork	+	GAG|tork AP|tork INT|tork RT|tork RNaseH|tork
Chr2_12544313_12555442	Gypsy	tat	+	AP|tat RT|tat RNaseH|tat INT|tat
Chr2_12702795_12711369	Copia	sire	+	GAG|sire AP|sire INT|sire RT|sire RNaseH|sire
Chr2_13100794_13115287	Gypsy	tat	+	GAG|tat AP|tat RT|tat RNaseH|tat INT|tat
Chr2_13321359_13332274	Gypsy	mixture	?	GAG|del AP|crm RT|del RNaseH|del INT|del CHR|retroelement
Chr2_13379105_13395193	Gypsy	tat	+	GAG|tat AP|tat RT|tat RNaseH|tat INT|tat
Chr2_13433529_13446092	Gypsy	del	+	GAG|del AP|del RT|del RNaseH|del INT|del CHR|retroelement
Chr2_13734077_13743296	Gypsy	crm	+	GAG|crm AP|crm RT|crm RNaseH|crm INT|crm
Chr2_13793859_13805843	Gypsy	del	+	GAG|del AP|del RT|del RNaseH|del INT|del CHR|retroelement
Chr2_13824864_13829704	Copia	retrofit	+	GAG|retrofit AP|retrofit INT|retrofit RT|retrofit RNaseH|retrofit
Chr2_138453_144301	Copia	tork	+	GAG|tork AP|tork INT|tork RT|tork RNaseH|tork
Chr2_14061456_14071662	Gypsy	del	+	GAG|del AP|del RT|del RNaseH|del INT|del CHR|retroelement
Chr2_14382876_14394280	Gypsy	tat	+	GAG|tat AP|tat RT|tat RNaseH|tat INT|tat
Chr2_14515743_14524108	Copia	sire	+	GAG|sire AP|sire INT|sire RT|sire RNaseH|sire
Chr2_14631686_14642644	Copia	sire	+	GAG|sire AP|sire INT|sire RT|sire RNaseH|sire
Chr2_14643401_14654216	Gypsy	del	+	GAG|del AP|del RT|del RNaseH|del INT|del CHR|retroelement
Chr2_14700295_14713484	Gypsy	mixture	+	GAG|athila AP|tat RT|tat RNaseH|tat INT|tat
Chr2_14839344_14853619	Gypsy	tat	+	GAG|tat AP|tat RT|tat RNaseH|tat INT|tat
Chr2_15094916_15100955	Gypsy	del	+	GAG|del AP|del RT|del RNaseH|del INT|del
Chr2_15110081_15115762	Copia	tork	+	GAG|tork AP|tork INT|tork RT|tork RNaseH|tork
Chr2_15115767_15127387	Gypsy	tat	+	GAG|tat AP|tat RT|tat RNaseH|tat INT|tat
Chr2_15160596_15166752	Copia	oryco	+	GAG|oryco AP|oryco INT|oryco RT|oryco RNaseH|oryco
Chr2_15216345_15221395	Gypsy	mixture	+	GAG|reina AP|del RT|reina RNaseH|reina INT|reina CHR|retroelement
Chr2_15332221_15344902	Gypsy	tat	+	GAG|tat AP|tat RT|tat RNaseH|tat INT|tat
Chr2_15664033_15675202	Copia	tork	+	GAG|tork AP|tork INT|tork RT|tork RNaseH|tork
Chr2_15782186_15788025	Copia	tork	+	GAG|tork AP|tork INT|tork RT|tork RNaseH|tork
Chr2_16020298_16033062	Gypsy	tat	+	GAG|tat AP|tat RT|tat RNaseH|tat INT|tat
Chr2_16136502_16144052	Gypsy	crm	+	GAG|crm AP|crm RT|crm RNaseH|crm INT|crm
Chr2_16372492_16383868	Gypsy	tat	+	GAG|tat AP|tat RT|tat RNaseH|tat INT|tat
Chr2_16418559_16424071	Gypsy	mixture	+	GAG|reina AP|reina RT|reina RNaseH|reina INT|reina CHR|retroelement
Chr2_16582592_16591604	Gypsy	del	+	GAG|del AP|del RT|del RNaseH|del INT|del CHR|retroelement
Chr2_16756013_16762255	Copia	tork	+	GAG|tork AP|tork INT|tork RT|tork RNaseH|tork
Chr2_16885695_16895582	Gypsy	del	+	GAG|del AP|del RT|del RNaseH|del INT|del CHR|retroelement
Chr2_16931317_16943380	Gypsy	del	+	GAG|del AP|del RT|del RNaseH|del INT|del CHR|retroelement
Chr2_17130293_17142033	Gypsy	del	+	GAG|del AP|del RT|del RNaseH|del INT|del CHR|retroelement
Chr2_17177629_17183384	Copia	oryco	+	GAG|oryco AP|oryco INT|oryco RT|oryco RNaseH|oryco
Chr2_17529806_17534816	Copia	mixture	+	AP|retrofit INT|retrofit RT|tork RNaseH|retrofit
Chr2_1767932_1772818	Copia	retrofit	+	AP|retrofit INT|retrofit RT|retrofit RNaseH|retrofit
Chr2_17917469_17926462	Gypsy	tat	+	AP|tat RT|tat RNaseH|tat INT|tat
Chr2_1802032_1814985	Gypsy	tat	+	GAG|tat AP|tat RT|tat RNaseH|tat INT|tat
Chr2_18040192_18045408	Copia	mixture	+	AP|ty1/copia INT|retrofit RT|tork RNaseH|retrofit
Chr2_18071921_18077142	Copia	retrofit	+	GAG|retrofit AP|retrofit INT|retrofit RT|retrofit RNaseH|retrofit
Chr2_18147991_18162702	Gypsy	tat	+	GAG|tat AP|tat RT|tat RNaseH|tat INT|tat
Chr2_18195832_18207564	Gypsy	del	+	GAG|del AP|del RT|del RNaseH|del INT|del CHR|retroelement
Chr2_18426064_18432806	Copia	tork	+	GAG|tork AP|tork INT|tork RT|tork RNaseH|tork
Chr2_18665435_18676285	Gypsy	tat	+	GAG|tat AP|tat RT|tat RNaseH|tat INT|tat
Chr2_1889527_1902016	Gypsy	tat	+	GAG|tat AP|tat RT|tat RNaseH|tat INT|tat
Chr2_19035764_19041105	Gypsy	reina	+	GAG|reina AP|reina RT|reina RNaseH|reina INT|reina
Chr2_19732703_19746355	Gypsy	tat	+	GAG|tat AP|tat RT|tat RNaseH|tat INT|tat
Chr2_19820280_19833555	Gypsy	tat	+	GAG|tat AP|tat RT|tat RNaseH|tat INT|tat
Chr2_20207006_20217278	Gypsy	del	+	GAG|del AP|del RT|del RNaseH|del INT|del
Chr2_20322709_20327853	Copia	oryco	+	GAG|oryco AP|oryco INT|oryco RT|oryco RNaseH|oryco
Chr2_20336946_20343165	Copia	tork	+	GAG|tork AP|tork INT|tork RT|tork RNaseH|tork
Chr2_20635302_20646001	Gypsy	del	+	GAG|del AP|del RT|del RNaseH|del INT|del CHR|retroelement
Chr2_20791403_20798154	Copia	sire	+	GAG|sire AP|sire INT|sire RT|sire RNaseH|sire
Chr2_21719807_21733195	Gypsy	del	+	GAG|del AP|del RT|del RNaseH|del INT|del CHR|retroelement
Chr2_22024972_22036248	Copia	sire	+	GAG|sire AP|sire INT|sire RT|sire RNaseH|sire
Chr2_22119984_22133170	Gypsy	tat	+	GAG|tat AP|tat RT|tat RNaseH|tat INT|tat
Chr2_2277418_2286885	Copia	retrofit	+	GAG|retrofit AP|retrofit INT|retrofit RT|retrofit RNaseH|retrofit
Chr2_2295732_2305779	Gypsy	del	+	GAG|del AP|del RT|del RNaseH|del INT|del CHR|retroelement
Chr2_22957451_22962989	Copia	oryco	+	GAG|oryco AP|oryco INT|oryco RT|oryco RNaseH|oryco
Chr2_23301372_23311918	Gypsy	del	+	GAG|del AP|del RT|del RNaseH|del INT|del CHR|retroelement
Chr2_23343767_23358918	Gypsy	del	+	GAG|del AP|del RT|del RNaseH|del INT|del CHR|retroelement
Chr2_24360808_24369884	Copia	retrofit	+	GAG|retrofit AP|retrofit INT|retrofit RT|retrofit RNaseH|retrofit
Chr2_24397085_24403483	Gypsy	mixture	+	GAG|reina AP|reina RT|reina RNaseH|reina INT|reina CHR|retroelement
Chr2_2460354_2468960	Gypsy	mixture	+	GAG|athila AP|tat RT|tat RNaseH|tat INT|tat
Chr2_24608386_24620020	Gypsy	del	+	GAG|del AP|del RT|del RNaseH|del INT|del CHR|retroelement
Chr2_2468976_2481990	Gypsy	tat	+	GAG|tat AP|tat RT|tat RNaseH|tat INT|tat
Chr2_25243583_25250029	Copia	tork	+	GAG|tork AP|tork INT|tork RT|tork RNaseH|tork
Chr2_25289781_25302237	Gypsy	del	+	GAG|del AP|del RT|del RNaseH|del INT|del CHR|retroelement
Chr2_25366740_25371975	Gypsy	mixture	+	GAG|reina AP|reina RT|reina RNaseH|reina INT|reina CHR|retroelement
Chr2_25706357_25718894	Gypsy	del	+	GAG|del AP|del RT|del RNaseH|del INT|del CHR|retroelement
Chr2_26056429_26067478	Gypsy	tat	+	GAG|tat AP|tat RT|tat RNaseH|tat INT|tat
Chr2_26180449_26189594	Gypsy	del	+	GAG|del AP|del RT|del RNaseH|del INT|del CHR|retroelement
Chr2_26217296_26228654	Gypsy	del	+	GAG|del AP|del RT|del RNaseH|del INT|del
Chr2_26427135_26438654	Gypsy	del	+	GAG|del AP|del RT|del RNaseH|del INT|del CHR|retroelement
Chr2_26682566_26687970	Gypsy	mixture	+	GAG|reina AP|reina RT|reina RNaseH|reina INT|reina CHR|retroelement
Chr2_26887946_26900425	Gypsy	tat	+	GAG|tat AP|tat RT|tat RNaseH|tat INT|tat
Chr2_268975_273932	Gypsy	mixture	+	GAG|reina AP|reina RT|reina RNaseH|reina INT|reina CHR|retroelement
Chr2_27573665_27585792	Gypsy	del	+	GAG|del AP|del RT|del RNaseH|del INT|del CHR|retroelement
Chr2_27890935_27902654	Gypsy	tat	+	GAG|tat AP|tat RT|tat RNaseH|tat INT|tat
Chr2_28022149_28033560	Gypsy	tat	+	GAG|tat AP|tat RT|tat RNaseH|tat INT|tat
Chr2_28195637_28207858	Gypsy	del	+	GAG|del AP|del RT|del RNaseH|del INT|del CHR|retroelement
Chr2_28394170_28406937	Gypsy	del	+	GAG|del AP|del RT|del RNaseH|del INT|del CHR|retroelement
Chr2_28592012_28605647	Gypsy	del	+	GAG|del AP|del RT|del RNaseH|del INT|del CHR|retroelement
Chr2_28834120_28849624	Gypsy	tat	+	AP|tat RT|tat RNaseH|tat INT|tat
Chr2_29040660_29052217	Gypsy	del	+	GAG|del AP|del RT|del RNaseH|del INT|del CHR|retroelement
Chr2_29153901_29165339	Gypsy	del	+	GAG|del AP|del RT|del RNaseH|del INT|del CHR|retroelement
Chr2_3009070_3021968	Gypsy	tat	+	GAG|tat AP|tat RT|tat RNaseH|tat INT|tat
Chr2_30168858_30182860	Gypsy	tat	+	AP|tat RT|tat RNaseH|tat INT|tat
Chr2_30240203_30251964	Gypsy	del	+	GAG|del AP|del RT|del RNaseH|del INT|del CHR|retroelement
Chr2_30480461_30491626	Gypsy	tat	+	GAG|tat AP|tat RT|tat RNaseH|tat INT|tat
Chr2_3114227_3119474	Copia	mixture	+	GAG|retrofit AP|ty1/copia INT|retrofit RT|tork RNaseH|retrofit
Chr2_31377037_31390111	Gypsy	tat	+	GAG|tat AP|tat RT|tat RNaseH|tat INT|tat
Chr2_31825954_31831822	Copia	tork	+	GAG|tork AP|tork INT|tork RT|tork RNaseH|tork
Chr2_320579_331916	Gypsy	tat	+	GAG|tat AP|tat RT|tat RNaseH|tat INT|tat
Chr2_32073358_32079092	Copia	oryco	+	GAG|oryco AP|oryco INT|oryco RT|oryco RNaseH|oryco
Chr2_32135232_32148077	Gypsy	tat	+	GAG|tat AP|tat RT|tat RNaseH|tat INT|tat
Chr2_32215847_32222089	Copia	tork	+	GAG|tork AP|tork INT|tork RT|tork RNaseH|tork
Chr2_32710759_32715899	Gypsy	mixture	+	GAG|reina AP|del RT|reina RNaseH|reina INT|reina CHR|retroelement
Chr2_32810820_32819435	Gypsy	del	+	GAG|del AP|del RT|del RNaseH|del INT|del CHR|retroelement
Chr2_33900059_33908938	Gypsy	tat	+	GAG|tat AP|tat RT|tat RNaseH|tat INT|tat
Chr2_3393878_3398077	Copia	tork	+	GAG|tork AP|tork INT|tork RT|tork RNaseH|tork
Chr2_33946917_33952117	Copia	mixture	+	GAG|retrofit AP|ty1/copia INT|retrofit RT|tork RNaseH|retrofit
Chr2_34311643_34322559	Gypsy	tat	+	GAG|tat AP|tat RT|tat RNaseH|tat INT|tat
Chr2_3433921_3439688	Copia	oryco	+	GAG|oryco AP|oryco INT|oryco RT|oryco RNaseH|oryco
Chr2_3460424_3465909	Copia	mixture	+	AP|retrofit INT|retrofit RT|tork RNaseH|retrofit
Chr2_35465767_35475622	Gypsy	del	+	GAG|del AP|del RT|del RNaseH|del INT|del CHR|retroelement
Chr2_35862177_35872829	Gypsy	tat	+	GAG|tat AP|tat RT|tat RNaseH|tat INT|tat
Chr2_3897342_3908645	Gypsy	tat	+	GAG|tat AP|tat RT|tat RNaseH|tat INT|tat
Chr2_3911179_3924050	Gypsy	tat	+	GAG|tat AP|tat RT|tat RNaseH|tat INT|tat
Chr2_460607_465567	Copia	retrofit	+	GAG|retrofit AP|retrofit INT|retrofit RT|retrofit RNaseH|retrofit
Chr2_5427913_5439366	Gypsy	tat	+	AP|tat RT|tat RNaseH|tat INT|tat
Chr2_597086_608496	Gypsy	del	+	GAG|del AP|del RT|del RNaseH|del INT|del CHR|retroelement
Chr2_6860368_6866763	Copia	tork	+	GAG|tork AP|tork INT|tork RT|tork RNaseH|tork
Chr2_7884914_7891154	Copia	tork	+	GAG|tork AP|tork INT|tork RT|tork RNaseH|tork
Chr2_7905480_7918440	Gypsy	tat	+	GAG|tat AP|tat RT|tat RNaseH|tat INT|tat
Chr2_8042263_8047598	Gypsy	reina	+	GAG|reina AP|reina RT|reina RNaseH|reina INT|reina
Chr2_9147429_9153543	Copia	retrofit	+	GAG|retrofit AP|retrofit INT|retrofit RT|retrofit RNaseH|retrofit
Chr2_9195320_9207275	Gypsy	del	+	GAG|del AP|del RT|del RNaseH|del INT|del CHR|retroelement
Chr2_9419874_9428935	Copia	tork	+	GAG|tork AP|tork INT|tork RT|tork RNaseH|tork
Chr2_9914455_9920001	Gypsy	reina	+	GAG|reina AP|reina RT|reina RNaseH|reina INT|reina
Chr3_11294305_11305920	Gypsy	tat	+	GAG|tat AP|tat RT|tat RNaseH|tat INT|tat
Chr3_12079768_12092658	Gypsy	tat	+	GAG|tat AP|tat RT|tat RNaseH|tat INT|tat
Chr3_12241620_12247510	Copia	tork	+	GAG|tork AP|tork INT|tork RT|tork RNaseH|tork
Chr3_12660855_12666229	Copia	tork	+	GAG|tork AP|tork INT|tork RT|tork RNaseH|tork
Chr3_13202652_13216926	Gypsy	tat	+	AP|tat RT|tat RNaseH|tat INT|tat
Chr3_13358152_13369918	Gypsy	del	+	GAG|del AP|del RT|del RNaseH|del INT|del CHR|retroelement
Chr3_13432479_13444090	Gypsy	del	+	GAG|del AP|del RT|del RNaseH|del INT|del CHR|retroelement
Chr3_13522930_13535002	Gypsy	del	+	GAG|del AP|del RT|del RNaseH|del INT|del CHR|retroelement
Chr3_13614557_13624322	Gypsy	tat	+	GAG|tat AP|tat RT|tat RNaseH|tat INT|tat
Chr3_13801381_13807647	Copia	tork	+	GAG|tork AP|tork INT|tork RT|tork RNaseH|tork
Chr3_1380849_1392409	Gypsy	tat	+	GAG|tat AP|tat RT|tat RNaseH|tat INT|tat
Chr3_13814983_13827867	Gypsy	tat	+	GAG|tat AP|tat RT|tat RNaseH|tat INT|tat
Chr3_13850188_13856819	Copia	oryco	+	GAG|oryco AP|oryco INT|oryco RT|oryco RNaseH|oryco
Chr3_13864689_13877582	Gypsy	tat	+	GAG|tat AP|tat RT|tat RNaseH|tat INT|tat
Chr3_14019247_14023968	Copia	retrofit	+	GAG|retrofit AP|retrofit INT|retrofit RT|retrofit RNaseH|retrofit
Chr3_14121573_14133022	Gypsy	tat	+	GAG|tat AP|tat RT|tat RNaseH|tat INT|tat
Chr3_14636176_14647629	Gypsy	tat	+	AP|tat RT|tat RNaseH|tat INT|tat
Chr3_14730290_14735490	Copia	mixture	+	GAG|retrofit AP|ty1/copia INT|retrofit RT|tork RNaseH|retrofit
Chr3_14907459_14912802	Gypsy	mixture	+	GAG|reina AP|reina RT|reina RNaseH|reina INT|reina CHR|retroelement
Chr3_15034254_15039172	Copia	oryco	+	GAG|oryco AP|oryco INT|oryco RT|oryco RNaseH|oryco
Chr3_15081378_15092680	Gypsy	tat	+	GAG|tat AP|tat RT|tat RNaseH|tat INT|tat
Chr3_15178602_15183556	Copia	oryco	+	GAG|oryco AP|oryco INT|oryco RT|oryco RNaseH|oryco
Chr3_15236329_15251498	Gypsy	tat	+	AP|tat RT|tat RNaseH|tat INT|tat
Chr3_15257586_15269614	Gypsy	del	+	GAG|del AP|del RT|del RNaseH|del INT|del CHR|retroelement
Chr3_15275362_15287344	Gypsy	del	+	GAG|del AP|del RT|del RNaseH|del INT|del CHR|retroelement
Chr3_15346590_15360157	Gypsy	tat	+	GAG|tat AP|tat RT|tat RNaseH|tat INT|tat
Chr3_15535641_15548613	Gypsy	tat	+	GAG|tat AP|tat RT|tat RNaseH|tat INT|tat
Chr3_16158387_16163666	Copia	oryco	+	GAG|oryco AP|oryco INT|oryco RT|oryco RNaseH|oryco
Chr3_16345335_16357104	Gypsy	tat	+	GAG|tat AP|tat RT|tat RNaseH|tat INT|tat
Chr3_16516098_16527625	Gypsy	tat	+	GAG|tat AP|tat RT|tat RNaseH|tat INT|tat
Chr3_16903631_16914931	Gypsy	tat	+	GAG|tat AP|tat RT|tat RNaseH|tat INT|tat
Chr3_16978983_16990540	Gypsy	del	+	GAG|del AP|del RT|del RNaseH|del INT|del CHR|retroelement
Chr3_17014118_17019374	Gypsy	reina	+	GAG|reina AP|reina RT|reina RNaseH|reina INT|reina
Chr3_17178046_17188993	Gypsy	tat	+	AP|tat RT|tat RNaseH|tat INT|tat
Chr3_17218768_17229913	Gypsy	tat	+	GAG|tat AP|tat RT|tat RNaseH|tat INT|tat
Chr3_17494048_17506225	Gypsy	del	+	GAG|del AP|del RT|del RNaseH|del INT|del CHR|retroelement
Chr3_17583126_17587899	Copia	retrofit	+	GAG|retrofit AP|retrofit INT|retrofit RT|retrofit RNaseH|retrofit
Chr3_17644808_17655123	Gypsy	tat	+	AP|tat RT|tat RNaseH|tat INT|tat
Chr3_17730177_17736398	Copia	tork	+	GAG|tork AP|tork INT|tork RT|tork RNaseH|tork
Chr3_17761643_17767944	Copia	tork	+	GAG|tork AP|tork INT|tork RT|tork RNaseH|tork
Chr3_17955042_17965482	Copia	sire	+	GAG|sire AP|sire INT|sire RT|sire RNaseH|sire
Chr3_18046237_18051825	Copia	tork	+	GAG|tork AP|tork INT|tork RT|tork RNaseH|tork
Chr3_1805954_1811712	Copia	oryco	+	GAG|oryco AP|oryco INT|oryco RT|oryco RNaseH|oryco
Chr3_18253996_18264596	Gypsy	del	+	GAG|del AP|del RT|del RNaseH|del INT|del CHR|retroelement
Chr3_18837220_18849264	Gypsy	del	+	GAG|del AP|del RT|del RNaseH|del INT|del CHR|retroelement
Chr3_18993131_19004828	Gypsy	tat	+	GAG|tat AP|tat RT|tat RNaseH|tat INT|tat
Chr3_1910837_1916540	Copia	oryco	+	GAG|oryco AP|oryco INT|oryco RT|oryco RNaseH|oryco
Chr3_19229863_19236637	Copia	tork	+	GAG|tork AP|tork INT|tork RT|tork RNaseH|tork
Chr3_19616174_19627769	Gypsy	tat	+	GAG|tat AP|tat RT|tat RNaseH|tat INT|tat
Chr3_19640367_19651755	Gypsy	del	+	GAG|del AP|del RT|del RNaseH|del INT|del CHR|retroelement
Chr3_19792343_19804770	Gypsy	tat	+	GAG|tat AP|tat RT|tat RNaseH|tat INT|tat
Chr3_19846763_19857375	Gypsy	del	+	GAG|del AP|del RT|del RNaseH|del INT|del CHR|retroelement
Chr3_19977752_19989156	Gypsy	del	+	GAG|del AP|del RT|del RNaseH|del INT|del CHR|retroelement
Chr3_20096139_20103164	Gypsy	del	+	GAG|del AP|del RT|del RNaseH|del INT|del CHR|retroelement
Chr3_20148897_20162580	Gypsy	del	+	GAG|del AP|del RT|del RNaseH|del INT|del CHR|retroelement
Chr3_20200236_20211472	Gypsy	tat	+	GAG|tat AP|tat RT|tat RNaseH|tat INT|tat
Chr3_20729282_20740709	Gypsy	tat	+	AP|tat RT|tat RNaseH|tat INT|tat
Chr3_20804178_20812974	Gypsy	tat	+	AP|tat RT|tat RNaseH|tat INT|tat
Chr3_21395489_21408796	Gypsy	tat	+	GAG|tat AP|tat RT|tat RNaseH|tat INT|tat
Chr3_21525145_21536799	Gypsy	tat	+	GAG|tat AP|tat RT|tat RNaseH|tat INT|tat
Chr3_21573597_21582401	Copia	sire	+	GAG|sire AP|sire INT|sire RT|sire RNaseH|sire
Chr3_21804654_21813731	Gypsy	del	+	GAG|del AP|del RT|del RNaseH|del INT|del CHR|retroelement
Chr3_21821836_21834577	Gypsy	tat	+	GAG|tat AP|tat RT|tat RNaseH|tat INT|tat
Chr3_21846042_21857725	Gypsy	del	+	GAG|del AP|del RT|del RNaseH|del INT|del CHR|retroelement
Chr3_21921198_21934549	Gypsy	del	+	GAG|del AP|del RT|del RNaseH|del INT|del CHR|retroelement
Chr3_22554429_22566332	Gypsy	tat	+	GAG|tat AP|tat RT|tat RNaseH|tat INT|tat
Chr3_22643635_22649089	Gypsy	reina	+	GAG|reina AP|reina RT|reina RNaseH|reina INT|reina
Chr3_22785666_22791908	Copia	tork	+	GAG|tork AP|tork INT|tork RT|tork RNaseH|tork
Chr3_2314596_2328680	Gypsy	del	+	GAG|del AP|del RT|del RNaseH|del INT|del CHR|retroelement
Chr3_23163810_23178706	Gypsy	del	+	GAG|del AP|del RT|del RNaseH|del INT|del CHR|retroelement
Chr3_23191627_23199814	Gypsy	del	+	GAG|del AP|del RT|del RNaseH|del INT|del CHR|retroelement
Chr3_23304440_23313192	Gypsy	del	+	GAG|del AP|del RT|del RNaseH|del INT|del CHR|retroelement
Chr3_23715792_23724736	Copia	sire	+	GAG|sire AP|sire INT|sire RT|sire RNaseH|sire
Chr3_24076724_24087136	Gypsy	del	+	GAG|del AP|del RT|del RNaseH|del INT|del CHR|retroelement
Chr3_24113579_24120706	Gypsy	mixture	+	GAG|tork AP|del RT|del RNaseH|del INT|del CHR|retroelement
Chr3_24884601_24891280	Copia	tork	+	GAG|tork AP|tork INT|tork RT|tork RNaseH|tork
Chr3_24931490_24941992	Gypsy	del	+	GAG|del AP|del RT|del RNaseH|del INT|del
Chr3_25696211_25706045	Gypsy	del	+	GAG|del AP|del RT|del RNaseH|del INT|del CHR|retroelement
Chr3_26099659_26111167	Gypsy	del	+	GAG|del AP|del RT|del RNaseH|del INT|del CHR|retroelement
Chr3_26271667_26276299	Copia	tork	+	GAG|tork AP|tork INT|tork RT|tork RNaseH|tork
Chr3_26470023_26476197	Copia	tork	+	GAG|tork AP|tork INT|tork RT|tork RNaseH|tork
Chr3_27181824_27187961	Gypsy	reina	+	GAG|reina AP|reina RT|reina RNaseH|reina INT|reina
Chr3_27524141_27535375	Gypsy	tat	+	AP|tat RT|tat RNaseH|tat INT|tat
Chr3_27744819_27756298	Gypsy	tat	+	AP|tat RT|tat RNaseH|tat INT|tat
Chr3_27897790_27908967	Gypsy	del	+	GAG|del AP|del RT|del RNaseH|del INT|del CHR|retroelement
Chr3_28279259_28285061	Copia	tork	+	GAG|tork AP|tork INT|tork RT|tork RNaseH|tork
Chr3_28457426_28463306	Copia	tork	+	GAG|tork AP|tork INT|tork RT|tork RNaseH|tork
Chr3_28619222_28624757	Copia	retrofit	+	GAG|retrofit AP|retrofit INT|retrofit RT|retrofit RNaseH|retrofit
Chr3_29646775_29652526	Copia	tork	+	GAG|tork AP|tork INT|tork RT|tork RNaseH|tork
Chr3_29912470_29926310	Gypsy	tat	+	GAG|tat AP|tat RT|tat RNaseH|tat INT|tat
Chr3_29959214_29971732	Gypsy	tat	+	GAG|tat AP|tat RT|tat RNaseH|tat INT|tat
Chr3_30138427_30149755	Gypsy	tat	+	GAG|tat AP|tat RT|tat RNaseH|tat INT|tat
Chr3_3055432_3064550	Gypsy	reina	+	GAG|reina AP|reina RT|reina RNaseH|reina INT|reina
Chr3_31296_47397	Gypsy	tat	+	GAG|tat AP|tat RT|tat RNaseH|tat INT|tat
Chr3_31793509_31801861	Copia	sire	+	GAG|sire AP|sire INT|sire RT|sire RNaseH|sire
Chr3_32201343_32207010	Copia	oryco	+	GAG|oryco AP|oryco INT|oryco RT|oryco RNaseH|oryco
Chr3_32218930_32230255	Gypsy	tat	+	GAG|tat AP|tat RT|tat RNaseH|tat INT|tat
Chr3_32719265_32730582	Gypsy	tat	+	GAG|tat AP|tat RT|tat RNaseH|tat INT|tat
Chr3_3289790_3294662	Copia	retrofit	+	GAG|retrofit AP|retrofit INT|retrofit RT|retrofit RNaseH|retrofit
Chr3_33665605_33674514	Gypsy	del	+	GAG|del AP|del RT|del RNaseH|del INT|del
Chr3_33702010_33707270	Copia	mixture	+	AP|ty1/copia INT|retrofit RT|tork RNaseH|retrofit
Chr3_34055628_34066482	Gypsy	del	+	GAG|del AP|del RT|del RNaseH|del INT|del CHR|retroelement
Chr3_34149775_34161278	Gypsy	del	+	GAG|del AP|del RT|del RNaseH|del INT|del CHR|retroelement
Chr3_34247444_34253681	Copia	tork	+	GAG|tork AP|tork INT|tork RT|tork RNaseH|tork
Chr3_34947493_34952498	Copia	oryco	+	GAG|oryco AP|oryco INT|oryco RT|oryco RNaseH|oryco
Chr3_35677423_35687716	Copia	sire	+	GAG|sire AP|sire INT|sire RT|sire RNaseH|sire
Chr3_36050578_36061982	Gypsy	tat	+	GAG|tat AP|tat RT|tat RNaseH|tat INT|tat
Chr3_415035_425336	Copia	sire	+	GAG|sire AP|sire INT|sire RT|sire RNaseH|sire
Chr3_48300_61192	Gypsy	tat	+	GAG|tat AP|tat RT|tat RNaseH|tat INT|tat
Chr3_581228_587352	Copia	tork	+	GAG|tork AP|tork INT|tork RT|tork RNaseH|tork
Chr3_6207000_6212799	Copia	tork	+	GAG|tork AP|tork INT|tork RT|tork RNaseH|tork
Chr3_7387605_7401507	Copia	sire	+	GAG|sire AP|sire INT|sire RT|sire RNaseH|sire
Chr3_7409475_7415853	Copia	tork	+	GAG|tork AP|tork INT|tork RT|tork RNaseH|tork
Chr3_7636051_7642052	Copia	tork	+	GAG|tork AP|tork INT|tork RT|tork RNaseH|tork
Chr3_7803771_7810038	Copia	tork	+	GAG|tork AP|tork INT|tork RT|tork RNaseH|tork
Chr3_7834283_7839053	Copia	retrofit	+	GAG|retrofit AP|retrofit INT|retrofit RT|retrofit RNaseH|retrofit
Chr3_8019913_8031354	Gypsy	tat	+	GAG|tat AP|tat RT|tat RNaseH|tat INT|tat
Chr3_8280126_8290909	Gypsy	del	+	GAG|del AP|del RT|del RNaseH|del INT|del CHR|retroelement
Chr3_916097_921711	Copia	tork	+	GAG|tork AP|tork INT|tork RT|tork RNaseH|tork
Chr3_9807172_9812820	Copia	oryco	+	GAG|oryco AP|oryco INT|oryco RT|oryco RNaseH|oryco
Chr4_10192400_10202175	Gypsy	del	+	GAG|del AP|del RT|del RNaseH|del INT|del CHR|retroelement
Chr4_10222512_10232713	Gypsy	del	+	GAG|del AP|del RT|del RNaseH|del INT|del CHR|retroelement
Chr4_10251928_10256693	Gypsy	reina	+	GAG|reina AP|reina RT|reina RNaseH|reina INT|reina
Chr4_10270772_10282790	Gypsy	del	+	GAG|del AP|del RT|del RNaseH|del INT|del CHR|retroelement
Chr4_10399379_10411349	Gypsy	del	+	GAG|del AP|del RT|del RNaseH|del INT|del CHR|retroelement
Chr4_1057105_1069911	Gypsy	tat	+	GAG|tat AP|tat RT|tat RNaseH|tat INT|tat
Chr4_10711587_10723410	Gypsy	del	+	GAG|del AP|del RT|del RNaseH|del INT|del CHR|retroelement
Chr4_10888560_10899290	Gypsy	del	+	GAG|del AP|del RT|del RNaseH|del INT|del CHR|retroelement
Chr4_10906941_10916231	Gypsy	del	+	GAG|del AP|del RT|del RNaseH|del INT|del CHR|retroelement
Chr4_10918070_10926646	Gypsy	del	+	GAG|del AP|del RT|del RNaseH|del INT|del CHR|retroelement
Chr4_10963020_10974241	Gypsy	del	+	GAG|del AP|del RT|del RNaseH|del INT|del CHR|retroelement
Chr4_11010472_11025752	Gypsy	tat	+	GAG|tat AP|tat RT|tat RNaseH|tat INT|tat
Chr4_11038036_11051043	Gypsy	tat	+	AP|tat RT|tat RNaseH|tat INT|tat
Chr4_11113048_11118667	Copia	tork	+	GAG|tork AP|tork INT|tork RT|tork RNaseH|tork
Chr4_11139232_11148910	Copia	tork	+	AP|tork INT|tork RT|tork RNaseH|tork
Chr4_11155298_11170830	Gypsy	del	+	GAG|del AP|del RT|del RNaseH|del INT|del CHR|retroelement
Chr4_11537613_11543863	Copia	tork	+	GAG|tork AP|tork INT|tork RT|tork RNaseH|tork
Chr4_11697873_11709878	Gypsy	del	+	GAG|del AP|del RT|del RNaseH|del INT|del CHR|retroelement
Chr4_11784399_11790062	Copia	oryco	+	GAG|oryco AP|oryco INT|oryco RT|oryco RNaseH|oryco
Chr4_11899545_11910851	Gypsy	tat	+	GAG|tat AP|tat RT|tat RNaseH|tat INT|tat
Chr4_1191689_1197931	Copia	tork	+	GAG|tork AP|tork INT|tork RT|tork RNaseH|tork
Chr4_11920714_11926354	Copia	tork	+	GAG|tork AP|tork INT|tork RT|tork RNaseH|tork
Chr4_11988844_12001145	Gypsy	tat	+	GAG|tat AP|tat RT|tat RNaseH|tat INT|tat
Chr4_12151312_12163249	Gypsy	del	+	GAG|del AP|del RT|del RNaseH|del INT|del CHR|retroelement
Chr4_12181791_12193428	Gypsy	del	+	GAG|del AP|del RT|del RNaseH|del INT|del CHR|retroelement
Chr4_12205378_12210954	Gypsy	mixture	+	GAG|reina AP|reina RT|reina RNaseH|reina INT|reina CHR|retroelement
Chr4_12523109_12531716	Gypsy	mixture	+	GAG|reina AP|reina RT|reina RNaseH|reina INT|reina CHR|retroelement
Chr4_12568259_12582112	Gypsy	tat	+	AP|tat RT|tat RNaseH|tat INT|tat
Chr4_12685778_12693446	Copia	tork	+	AP|tork INT|tork RT|tork RNaseH|tork
Chr4_12696617_12701549	Copia	oryco	+	GAG|oryco AP|oryco INT|oryco RT|oryco RNaseH|oryco
Chr4_12794979_12805353	Gypsy	del	+	GAG|del AP|del RT|del RNaseH|del INT|del CHR|retroelement
Chr4_12816406_12828973	Gypsy	tat	+	AP|tat RT|tat RNaseH|tat INT|tat
Chr4_13036181_13048163	Gypsy	del	+	GAG|del AP|del RT|del RNaseH|del INT|del CHR|retroelement
Chr4_13065174_13080017	Gypsy	tat	+	GAG|tat AP|tat RT|tat RNaseH|tat INT|tat
Chr4_13105679_13110534	Copia	tork	+	GAG|tork AP|tork INT|tork RT|tork RNaseH|tork
Chr4_13296070_13307397	Gypsy	tat	+	GAG|tat AP|tat RT|tat RNaseH|tat INT|tat
Chr4_13323096_13332122	Copia	sire	+	GAG|sire AP|sire INT|sire RT|sire RNaseH|sire
Chr4_13372133_13387402	Gypsy	tat	+	GAG|tat AP|tat RT|tat RNaseH|tat INT|tat
Chr4_1341264_1351544	Gypsy	del	+	GAG|del AP|del RT|del RNaseH|del INT|del CHR|retroelement
Chr4_13594378_13605217	Gypsy	tat	+	GAG|tat AP|tat RT|tat RNaseH|tat INT|tat
Chr4_13627845_13640758	Gypsy	tat	+	GAG|tat AP|tat RT|tat RNaseH|tat INT|tat
Chr4_13736531_13749030	Gypsy	del	+	GAG|del AP|del RT|del RNaseH|del INT|del CHR|retroelement
Chr4_13760681_13766472	Copia	tork	+	GAG|tork AP|tork INT|tork RT|tork RNaseH|tork
Chr4_13853171_13859594	Copia	tork	+	GAG|tork AP|tork INT|tork RT|tork RNaseH|tork
Chr4_13952717_13958209	Copia	tork	+	GAG|tork AP|tork INT|tork RT|tork RNaseH|tork
Chr4_13974607_13982326	Gypsy	crm	+	GAG|crm AP|crm RT|crm RNaseH|crm INT|crm
Chr4_14116059_14127372	Gypsy	tat	+	GAG|tat AP|tat RT|tat RNaseH|tat INT|tat
Chr4_14139993_14152909	Gypsy	tat	+	GAG|tat AP|tat RT|tat RNaseH|tat INT|tat
Chr4_14945076_14950676	Gypsy	reina	+	GAG|reina AP|reina RT|reina RNaseH|reina INT|reina
Chr4_15052524_15061274	Gypsy	mixture	+	GAG|athila AP|tat RT|tat RNaseH|athila INT|tat
Chr4_15436847_15443099	Copia	tork	+	GAG|tork AP|tork INT|tork RT|tork RNaseH|tork
Chr4_15504182_15514885	Gypsy	tat	+	AP|tat RT|tat RNaseH|tat INT|tat
Chr4_15555839_15567906	Gypsy	del	+	GAG|del AP|del RT|del RNaseH|del INT|del CHR|retroelement
Chr4_15718644_15730709	Gypsy	del	+	GAG|del AP|del RT|del RNaseH|del INT|del CHR|retroelement
Chr4_16304134_16317349	Gypsy	del	+	GAG|del AP|del RT|del RNaseH|del INT|del CHR|retroelement
Chr4_16332134_16343593	Gypsy	tat	+	GAG|tat AP|tat RT|tat RNaseH|tat INT|tat
Chr4_16464035_16476553	Gypsy	tat	+	GAG|tat AP|tat RT|tat RNaseH|tat INT|tat
Chr4_1647777_1652501	Copia	retrofit	+	GAG|retrofit AP|retrofit INT|retrofit RT|retrofit RNaseH|retrofit
Chr4_16902432_16914163	Gypsy	tat	+	GAG|tat AP|tat RT|tat RNaseH|tat INT|tat
Chr4_17118463_17129778	Gypsy	tat	+	GAG|tat AP|tat RT|tat RNaseH|tat INT|tat
Chr4_17402923_17413910	Gypsy	del	+	GAG|del AP|del RT|del RNaseH|del INT|del CHR|retroelement
Chr4_17455912_17460995	Copia	oryco	+	GAG|oryco AP|oryco INT|oryco RT|oryco RNaseH|oryco
Chr4_17642989_17653497	Gypsy	tat	+	GAG|tat AP|tat RT|tat RNaseH|tat INT|tat
Chr4_17682157_17694335	Gypsy	del	+	GAG|del AP|del RT|del RNaseH|del INT|del CHR|retroelement
Chr4_17797604_17810384	Gypsy	mixture	+	GAG|athila AP|tat RT|tat RNaseH|tat INT|tat
Chr4_1795072_1806375	Gypsy	tat	+	GAG|tat AP|tat RT|tat RNaseH|tat INT|tat
Chr4_18071_28743	Gypsy	del	+	GAG|del AP|del RT|del RNaseH|del INT|del CHR|retroelement
Chr4_18126085_18132270	Copia	tork	+	GAG|tork AP|tork INT|tork RT|tork RNaseH|tork
Chr4_18302605_18311650	Copia	sire	+	GAG|sire AP|sire INT|sire RT|sire RNaseH|sire
Chr4_18577077_18583328	Copia	tork	+	GAG|tork AP|tork INT|tork RT|tork RNaseH|tork
Chr4_18681972_18688188	Copia	tork	+	GAG|tork AP|tork INT|tork RT|tork RNaseH|tork
Chr4_1927041_1938898	Gypsy	del	+	GAG|del AP|del RT|del RNaseH|del INT|del CHR|retroelement
Chr4_19744875_19756340	Copia	sire	+	GAG|sire AP|sire INT|sire RT|sire RNaseH|sire
Chr4_19760568_19769909	Gypsy	mixture	+	GAG|reina AP|reina RT|reina RNaseH|reina INT|reina CHR|retroelement
Chr4_1998044_2013651	Gypsy	tat	+	GAG|tat AP|tat RT|tat RNaseH|tat INT|tat
Chr4_20178427_20187014	Copia	sire	+	GAG|sire AP|sire INT|sire RT|sire RNaseH|sire
Chr4_20745803_20757413	Gypsy	del	+	GAG|del AP|del RT|del RNaseH|del INT|del CHR|retroelement
Chr4_20800261_20809939	Gypsy	del	+	GAG|del AP|del RT|del RNaseH|del INT|del CHR|retroelement
Chr4_21241633_21247376	Copia	tork	+	GAG|tork AP|tork INT|tork RT|tork RNaseH|tork
Chr4_2136202_2147216	Gypsy	del	+	GAG|del AP|del RT|del RNaseH|del INT|del CHR|retroelement
Chr4_2181775_2197972	Gypsy	del	+	GAG|del AP|del RT|del RNaseH|del INT|del CHR|retroelement
Chr4_21858331_21863990	Copia	oryco	+	GAG|oryco AP|oryco INT|oryco RT|oryco RNaseH|oryco
Chr4_22491563_22503065	Gypsy	del	+	GAG|del AP|del RT|del RNaseH|del INT|del CHR|retroelement
Chr4_2266037_2278075	Gypsy	tat	+	GAG|tat AP|tat RT|tat RNaseH|tat INT|tat
Chr4_22725200_22736412	Gypsy	del	+	GAG|del AP|del RT|del RNaseH|del INT|del CHR|retroelement
Chr4_23675086_23682806	Gypsy	crm	+	GAG|crm AP|crm RT|crm RNaseH|crm INT|crm
Chr4_2374139_2384791	Gypsy	tat	+	AP|tat RT|tat RNaseH|tat INT|tat
Chr4_2415683_2422312	Copia	tork	+	GAG|tork AP|tork INT|tork RT|tork RNaseH|tork
Chr4_24624991_24630736	Copia	oryco	+	GAG|oryco AP|oryco INT|oryco RT|oryco RNaseH|oryco
Chr4_24728723_24738658	Copia	tork	+	GAG|tork AP|tork INT|tork RT|tork RNaseH|tork
Chr4_25286405_25295555	Copia	sire	+	GAG|sire AP|sire INT|sire RT|sire RNaseH|sire
Chr4_25583857_25595191	Gypsy	tat	+	GAG|tat AP|tat RT|tat RNaseH|tat INT|tat
Chr4_2588046_2599717	Gypsy	del	+	GAG|del AP|del RT|del RNaseH|del INT|del CHR|retroelement
Chr4_26049350_26060974	Gypsy	del	+	GAG|del AP|del RT|del RNaseH|del INT|del CHR|retroelement
Chr4_26160203_26164923	Copia	mixture	+	AP|ty1/copia INT|retrofit RT|tork RNaseH|retrofit
Chr4_2681261_2693229	Gypsy	tat	+	AP|tat RT|tat RNaseH|tat INT|tat
Chr4_26820759_26830305	Gypsy	mixture	+	GAG|reina AP|reina RT|reina RNaseH|reina INT|reina CHR|retroelement
Chr4_26847782_26860019	Gypsy	del	+	GAG|del AP|del RT|del RNaseH|del INT|del CHR|retroelement
Chr4_26874339_26884664	Gypsy	del	+	GAG|del AP|del RT|del RNaseH|del INT|del CHR|retroelement
Chr4_26939205_26952342	Gypsy	tat	+	GAG|tat AP|tat RT|tat RNaseH|tat INT|tat
Chr4_27084120_27097007	Gypsy	tat	+	GAG|tat AP|tat RT|tat RNaseH|tat INT|tat
Chr4_2728123_2736615	Gypsy	del	+	GAG|del AP|del RT|del RNaseH|del INT|del CHR|retroelement
Chr4_27301811_27314587	Gypsy	tat	+	GAG|tat AP|tat RT|tat RNaseH|tat INT|tat
Chr4_2786235_2799104	Gypsy	tat	+	GAG|tat AP|tat RT|tat RNaseH|tat INT|tat
Chr4_27963653_27975753	Gypsy	del	+	GAG|del AP|del RT|del RNaseH|del INT|del CHR|retroelement
Chr4_280115_293371	Gypsy	tat	+	GAG|tat AP|tat RT|tat RNaseH|tat INT|tat
Chr4_28243837_28250054	Copia	tork	+	GAG|tork AP|tork INT|tork RT|tork RNaseH|tork
Chr4_28624874_28635712	Gypsy	del	+	GAG|del AP|del RT|del RNaseH|del INT|del CHR|retroelement
Chr4_28730574_28737194	Gypsy	mixture	+	GAG|reina AP|reina RT|reina RNaseH|reina INT|reina CHR|retroelement
Chr4_2895053_2906378	Gypsy	tat	+	GAG|tat AP|tat RT|tat RNaseH|tat INT|tat
Chr4_28979384_28989249	Gypsy	del	+	GAG|del AP|del RT|del RNaseH|del INT|del CHR|retroelement
Chr4_29010882_29020518	Gypsy	del	+	GAG|del AP|del RT|del RNaseH|del INT|del CHR|retroelement
Chr4_29167837_29178937	Gypsy	tat	+	GAG|tat AP|tat RT|tat RNaseH|tat INT|tat
Chr4_29266815_29273128	Copia	tork	+	GAG|tork AP|tork INT|tork RT|tork RNaseH|tork
Chr4_29594977_29601190	Copia	tork	+	GAG|tork AP|tork INT|tork RT|tork RNaseH|tork
Chr4_29687987_29699289	Gypsy	tat	+	GAG|tat AP|tat RT|tat RNaseH|tat INT|tat
Chr4_29764430_29769995	Copia	oryco	+	GAG|oryco AP|oryco INT|oryco RT|oryco RNaseH|oryco
Chr4_30457208_30463441	Gypsy	mixture	+	GAG|reina AP|reina RT|reina RNaseH|reina INT|reina CHR|retroelement
Chr4_30654206_30666484	Gypsy	del	+	GAG|del AP|del RT|del RNaseH|del INT|del CHR|retroelement
Chr4_30756618_30762454	Copia	mixture	+	AP|ty1/copia INT|retrofit RT|tork RNaseH|retrofit
Chr4_30831883_30841844	Gypsy	del	+	GAG|del AP|del RT|del RNaseH|del INT|del CHR|retroelement
Chr4_3084090_3093925	Gypsy	del	+	GAG|del AP|del RT|del RNaseH|del INT|del CHR|retroelement
Chr4_31155_41462	Gypsy	del	+	GAG|del AP|del RT|del RNaseH|del INT|del CHR|retroelement
Chr4_31205994_31211740	Copia	oryco	+	GAG|oryco AP|oryco INT|oryco RT|oryco RNaseH|oryco
Chr4_3153485_3165166	Gypsy	del	+	GAG|del AP|del RT|del RNaseH|del INT|del CHR|retroelement
Chr4_31588774_31593492	Copia	mixture	+	AP|ty1/copia INT|retrofit RT|tork RNaseH|retrofit
Chr4_31729295_31740620	Gypsy	tat	+	GAG|tat AP|tat RT|tat RNaseH|tat INT|tat
Chr4_31941886_31955887	Gypsy	del	+	GAG|del AP|del RT|del RNaseH|del INT|del CHR|retroelement
Chr4_32025572_32032016	Copia	tork	+	GAG|tork AP|tork INT|tork RT|tork RNaseH|tork
Chr4_32051683_32058123	Copia	tork	+	GAG|tork AP|tork INT|tork RT|tork RNaseH|tork
Chr4_32109120_32120781	Gypsy	del	+	GAG|del AP|del RT|del RNaseH|del INT|del CHR|retroelement
Chr4_32394374_32399548	Copia	oryco	+	GAG|oryco AP|oryco INT|oryco RT|oryco RNaseH|oryco
Chr4_32709631_32722601	Gypsy	del	+	GAG|del AP|del RT|del RNaseH|del INT|del CHR|retroelement
Chr4_32901597_32913077	Gypsy	del	+	GAG|del AP|del RT|del RNaseH|del INT|del CHR|retroelement
Chr4_33033013_33045924	Gypsy	tat	+	GAG|tat AP|tat RT|tat RNaseH|tat INT|tat
Chr4_3317250_3327732	Gypsy	del	+	GAG|del AP|del RT|del RNaseH|del INT|del
Chr4_33277633_33289161	Gypsy	del	+	GAG|del AP|del RT|del RNaseH|del INT|del CHR|retroelement
Chr4_33536746_33549254	Gypsy	del	+	GAG|del AP|del RT|del RNaseH|del INT|del CHR|retroelement
Chr4_34177144_34189948	Gypsy	tat	+	GAG|tat AP|tat RT|tat RNaseH|tat INT|tat
Chr4_34254811_34265081	Copia	sire	+	GAG|sire AP|sire INT|sire RT|sire RNaseH|sire
Chr4_3476113_3489082	Gypsy	tat	+	GAG|tat AP|tat RT|tat RNaseH|tat INT|tat
Chr4_34764456_34775908	Gypsy	tat	+	GAG|tat AP|tat RT|tat RNaseH|tat INT|tat
Chr4_35137462_35147835	Gypsy	tat	+	GAG|tat AP|tat RT|tat RNaseH|tat INT|tat
Chr4_35194704_35206265	Gypsy	tat	+	GAG|tat AP|tat RT|tat RNaseH|tat INT|tat
Chr4_3688497_3700567	Gypsy	del	+	GAG|del AP|del RT|del RNaseH|del INT|del CHR|retroelement
Chr4_3725424_3736785	Gypsy	tat	+	GAG|tat AP|tat RT|tat RNaseH|tat INT|tat
Chr4_3869897_3881198	Gypsy	tat	+	GAG|tat AP|tat RT|tat RNaseH|tat INT|tat
Chr4_3885251_3894534	Gypsy	del	+	GAG|del AP|del RT|del RNaseH|del INT|del CHR|retroelement
Chr4_3919835_3928969	Gypsy	del	+	GAG|del AP|del RT|del RNaseH|del INT|del
Chr4_4029411_4037423	Copia	oryco	+	GAG|oryco AP|oryco INT|oryco RT|oryco RNaseH|oryco
Chr4_4061682_4073775	Gypsy	del	+	GAG|del AP|del RT|del RNaseH|del INT|del CHR|retroelement
Chr4_417609_430368	Gypsy	tat	+	GAG|tat AP|tat RT|tat RNaseH|tat INT|tat
Chr4_4362294_4368744	Copia	tork	+	GAG|tork AP|tork INT|tork RT|tork RNaseH|tork
Chr4_4621908_4633891	Gypsy	del	+	GAG|del AP|del RT|del RNaseH|del INT|del CHR|retroelement
Chr4_4784555_4790803	Copia	tork	+	GAG|tork AP|tork INT|tork RT|tork RNaseH|tork
Chr4_4926896_4938656	Gypsy	tat	+	GAG|tat AP|tat RT|tat RNaseH|tat INT|tat
Chr4_5076300_5088594	Gypsy	del	+	GAG|del AP|del RT|del RNaseH|del INT|del CHR|retroelement
Chr4_5195962_5207096	Gypsy	tat	+	GAG|tat AP|tat RT|tat RNaseH|tat INT|tat
Chr4_5230548_5238247	Copia	sire	+	GAG|sire AP|sire INT|sire RT|sire RNaseH|sire
Chr4_5447112_5459189	Gypsy	del	+	GAG|del AP|del RT|del RNaseH|del INT|del CHR|retroelement
Chr4_5507496_5518834	Gypsy	tat	+	GAG|tat AP|tat RT|tat RNaseH|tat INT|tat
Chr4_5762760_5773686	Gypsy	del	+	GAG|del AP|del RT|del RNaseH|del INT|del CHR|retroelement
Chr4_5816756_5821736	Copia	oryco	+	GAG|oryco AP|oryco INT|oryco RT|oryco RNaseH|oryco
Chr4_5878948_5890250	Gypsy	tat	+	GAG|tat AP|tat RT|tat RNaseH|tat INT|tat
Chr4_6027795_6039289	Gypsy	tat	+	GAG|tat AP|tat RT|tat RNaseH|tat INT|tat
Chr4_6109511_6126480	Gypsy	del	+	GAG|del AP|del RT|del RNaseH|del INT|del CHR|retroelement
Chr4_6321217_6327936	Gypsy	reina	+	GAG|reina AP|reina RT|reina RNaseH|reina INT|reina
Chr4_6351758_6363442	Gypsy	tat	+	GAG|tat AP|tat RT|tat RNaseH|tat INT|tat
Chr4_6442300_6448192	Copia	tork	+	GAG|tork AP|tork INT|tork RT|tork RNaseH|tork
Chr4_6726970_6736345	Gypsy	del	+	GAG|del AP|del RT|del RNaseH|del INT|del CHR|retroelement
Chr4_6763154_6773784	Gypsy	del	+	GAG|del AP|del RT|del RNaseH|del INT|del CHR|retroelement
Chr4_6851252_6865546	Copia	sire	+	GAG|sire AP|sire INT|sire RT|sire RNaseH|sire
Chr4_7178818_7190156	Gypsy	tat	+	GAG|tat AP|tat RT|tat RNaseH|tat INT|tat
Chr4_7227188_7241407	Gypsy	tat	+	GAG|tat AP|tat RT|tat RNaseH|tat INT|tat
Chr4_7271036_7277872	Gypsy	crm	+	GAG|crm AP|crm RT|crm RNaseH|crm INT|crm
Chr4_7768739_7779583	Gypsy	del	+	GAG|del AP|del RT|del RNaseH|del INT|del CHR|retroelement
Chr4_7810612_7822217	Gypsy	del	+	GAG|del AP|del RT|del RNaseH|del INT|del CHR|retroelement
Chr4_7930221_7935826	Gypsy	mixture	+	GAG|reina AP|reina RT|reina RNaseH|reina INT|reina CHR|retroelement
Chr4_8176424_8183739	Gypsy	crm	+	GAG|crm AP|crm RT|crm RNaseH|crm INT|crm
Chr4_8193719_8205165	Gypsy	del	+	GAG|del AP|del RT|del RNaseH|del INT|del CHR|retroelement
Chr4_8464896_8471324	Copia	tork	+	GAG|tork AP|tork INT|tork RT|tork RNaseH|tork
Chr4_8485916_8497204	Gypsy	tat	+	GAG|tat AP|tat RT|tat RNaseH|tat INT|tat
Chr4_8654362_8670305	Gypsy	del	+	GAG|del AP|del RT|del RNaseH|del INT|del CHR|retroelement
Chr4_8727233_8740960	Gypsy	del	+	GAG|del AP|del RT|del RNaseH|del INT|del CHR|retroelement
Chr4_8793211_8807723	Gypsy	tat	+	GAG|tat AP|tat RT|tat RNaseH|tat INT|tat
Chr4_8847982_8856250	Gypsy	tat	+	AP|tat RT|tat RNaseH|tat INT|tat
Chr4_8895427_8906720	Gypsy	tat	+	GAG|tat AP|tat RT|tat RNaseH|tat INT|tat
Chr4_8992358_9003679	Gypsy	tat	+	GAG|tat AP|tat RT|tat RNaseH|tat INT|tat
Chr4_9023046_9030799	Gypsy	crm	+	GAG|crm AP|crm RT|crm RNaseH|crm INT|crm
Chr4_9246711_9256654	Gypsy	del	+	GAG|del AP|del RT|del RNaseH|del INT|del CHR|retroelement
Chr4_9279767_9285331	Gypsy	reina	+	GAG|reina AP|reina RT|reina RNaseH|reina INT|reina
Chr4_9318827_9325244	Copia	tork	+	GAG|tork AP|tork INT|tork RT|tork RNaseH|tork
Chr4_9462122_9475026	Gypsy	tat	+	GAG|tat AP|tat RT|tat RNaseH|tat INT|tat
Chr4_9500295_9511036	Gypsy	tat	+	GAG|tat AP|tat RT|tat RNaseH|tat INT|tat
Chr4_9523973_9534685	Gypsy	del	+	GAG|del AP|del RT|del RNaseH|del INT|del CHR|retroelement
Chr4_9926702_9931910	Copia	oryco	+	GAG|oryco AP|oryco INT|oryco RT|oryco RNaseH|oryco
Chr4_9982112_9988363	Copia	tork	+	GAG|tork AP|tork INT|tork RT|tork RNaseH|tork
Chr5_10139507_10153835	Gypsy	del	+	GAG|del AP|del RT|del RNaseH|del INT|del CHR|retroelement
Chr5_1029276_1040589	Gypsy	tat	+	GAG|tat AP|tat RT|tat RNaseH|tat INT|tat
Chr5_10320713_10331984	Gypsy	tat	+	GAG|tat AP|tat RT|tat RNaseH|tat INT|tat
Chr5_10480863_10490004	Gypsy	del	+	GAG|del AP|del RT|del RNaseH|del INT|del CHR|retroelement
Chr5_10554385_10566106	Gypsy	del	+	GAG|del AP|del RT|del RNaseH|del INT|del CHR|retroelement
Chr5_10595196_10607024	Gypsy	del	+	GAG|del AP|del RT|del RNaseH|del INT|del CHR|retroelement
Chr5_10683137_10695220	Gypsy	del	+	GAG|del AP|del RT|del RNaseH|del INT|del CHR|retroelement
Chr5_10779615_10786013	Copia	tork	+	GAG|tork AP|tork INT|tork RT|tork RNaseH|tork
Chr5_10874387_10881900	Gypsy	del	+	GAG|del AP|del RT|del RNaseH|del INT|del CHR|retroelement
Chr5_11072387_11083686	Gypsy	tat	+	AP|tat RT|tat RNaseH|tat INT|tat
Chr5_11100429_11112238	Gypsy	del	+	GAG|del AP|del RT|del RNaseH|del INT|del CHR|retroelement
Chr5_11160169_11170982	Gypsy	del	+	GAG|del AP|del RT|del RNaseH|del INT|del CHR|retroelement
Chr5_11183004_11188987	Copia	tork	+	GAG|tork AP|tork INT|tork RT|tork RNaseH|tork
Chr5_11225405_11236892	Gypsy	del	+	GAG|del AP|del RT|del RNaseH|del INT|del CHR|retroelement
Chr5_11341751_11353848	Gypsy	del	+	GAG|del AP|del RT|del RNaseH|del INT|del CHR|retroelement
Chr5_11412900_11418106	Gypsy	reina	+	GAG|reina AP|reina RT|reina RNaseH|reina INT|reina
Chr5_11452491_11463340	Gypsy	del	+	GAG|del AP|del RT|del RNaseH|del INT|del CHR|retroelement
Chr5_11597597_11607432	Gypsy	del	+	GAG|del AP|del RT|del RNaseH|del INT|del CHR|retroelement
Chr5_11769170_11781157	Gypsy	del	+	GAG|del AP|del RT|del RNaseH|del INT|del CHR|retroelement
Chr5_11933685_11944999	Gypsy	tat	+	GAG|tat AP|tat RT|tat RNaseH|tat INT|tat
Chr5_12033003_12045060	Gypsy	del	+	GAG|del AP|del RT|del RNaseH|del INT|del CHR|retroelement
Chr5_12363424_12371175	Gypsy	crm	+	GAG|crm AP|crm RT|crm RNaseH|crm INT|crm
Chr5_12441892_12452401	Gypsy	tat	+	GAG|tat AP|tat RT|tat RNaseH|tat INT|tat
Chr5_12631133_12644976	Gypsy	tat	+	GAG|tat AP|tat RT|tat RNaseH|tat INT|tat
Chr5_12820660_12832393	Copia	tork	+	GAG|tork AP|tork INT|tork RT|tork RNaseH|tork
Chr5_12847531_12862810	Gypsy	tat	+	GAG|tat AP|tat RT|tat RNaseH|tat INT|tat
Chr5_12942771_12954769	Gypsy	del	+	GAG|del AP|del RT|del RNaseH|del INT|del CHR|retroelement
Chr5_13121863_13132944	Gypsy	del	+	GAG|del AP|del RT|del RNaseH|del INT|del CHR|retroelement
Chr5_13153339_13165417	Gypsy	del	+	GAG|del AP|del RT|del RNaseH|del INT|del CHR|retroelement
Chr5_13287774_13302258	Gypsy	tat	+	GAG|tat AP|tat RT|tat RNaseH|tat INT|tat
Chr5_13341647_13350513	Gypsy	del	+	GAG|del AP|del RT|del RNaseH|del INT|del CHR|retroelement
Chr5_13968441_13974438	Copia	mixture	+	GAG|tork AP|ty1/copia INT|tork RT|tork RNaseH|tork
Chr5_13995101_14003672	Copia	sire	+	GAG|sire AP|sire INT|sire RT|sire RNaseH|sire
Chr5_14280940_14292716	Gypsy	del	+	GAG|del AP|del RT|del RNaseH|del INT|del CHR|retroelement
Chr5_14328593_14343205	Gypsy	tat	+	AP|tat RT|tat RNaseH|tat INT|tat
Chr5_14395306_14405712	Gypsy	tat	+	GAG|tat AP|tat RT|tat RNaseH|tat INT|tat
Chr5_14533950_14543170	Gypsy	del	+	GAG|del AP|del RT|del RNaseH|del INT|del
Chr5_14673768_14685188	Gypsy	tat	+	AP|tat RT|tat RNaseH|tat INT|tat
Chr5_14707457_14712280	Copia	retrofit	+	GAG|retrofit AP|retrofit INT|retrofit RT|retrofit RNaseH|retrofit
Chr5_15097751_15109253	Copia	sire	+	GAG|sire AP|sire INT|sire RT|sire RNaseH|sire
Chr5_1524449_1529782	Copia	oryco	+	GAG|oryco AP|oryco INT|oryco RT|oryco RNaseH|oryco
Chr5_15257146_15265150	Gypsy	del	+	GAG|del AP|del RT|del RNaseH|del INT|del CHR|retroelement
Chr5_15387107_15398172	Gypsy	del	+	GAG|del AP|del RT|del RNaseH|del INT|del CHR|retroelement
Chr5_15731011_15741346	Copia	sire	+	GAG|sire AP|sire INT|sire RT|sire RNaseH|sire
Chr5_1600876_1612106	Gypsy	del	+	GAG|del AP|del RT|del RNaseH|del INT|del CHR|retroelement
Chr5_16071737_16077486	Copia	tork	+	GAG|tork AP|tork INT|tork RT|tork RNaseH|tork
Chr5_16171863_16178070	Copia	tork	+	GAG|tork AP|tork INT|tork RT|tork RNaseH|tork
Chr5_16815974_16827738	Gypsy	tat	+	AP|tat RT|tat RNaseH|tat INT|tat
Chr5_17103681_17113871	Gypsy	del	+	GAG|del AP|del RT|del RNaseH|del INT|del CHR|retroelement
Chr5_17116527_17126829	Gypsy	tat	+	GAG|tat AP|tat RT|tat RNaseH|tat INT|tat
Chr5_17157791_17162580	Copia	retrofit	+	GAG|retrofit AP|retrofit INT|retrofit RT|retrofit RNaseH|retrofit
Chr5_17415595_17426782	Gypsy	tat	+	AP|tat RT|tat RNaseH|tat INT|tat
Chr5_17535787_17546516	Gypsy	tat	+	GAG|tat AP|tat RT|tat RNaseH|tat INT|tat
Chr5_17727482_17737840	Copia	sire	+	GAG|sire AP|sire INT|sire RT|sire RNaseH|sire
Chr5_18057225_18062560	Gypsy	mixture	+	GAG|reina AP|reina RT|reina RNaseH|reina INT|reina CHR|retroelement
Chr5_18093017_18102199	Gypsy	tat	+	GAG|tat AP|tat RT|tat RNaseH|tat INT|tat
Chr5_1812444_1825327	Gypsy	tat	+	GAG|tat AP|tat RT|tat RNaseH|tat INT|tat
Chr5_18149389_18155117	Copia	oryco	+	GAG|oryco AP|oryco INT|oryco RT|oryco RNaseH|oryco
Chr5_18173195_18178850	Copia	oryco	+	GAG|oryco AP|oryco INT|oryco RT|oryco RNaseH|oryco
Chr5_18278719_18290258	Gypsy	tat	+	GAG|tat AP|tat RT|tat RNaseH|tat INT|tat
Chr5_18541179_18551819	Gypsy	tat	+	GAG|tat AP|tat RT|tat RNaseH|tat INT|tat
Chr5_19148557_19154624	Copia	tork	+	GAG|tork AP|tork INT|tork RT|tork RNaseH|tork
Chr5_19418179_19422609	Copia	mixture	+	AP|ty1/copia INT|retrofit RT|tork RNaseH|retrofit
Chr5_19563853_19570006	Copia	tork	+	GAG|tork AP|tork INT|tork RT|tork RNaseH|tork
Chr5_19666479_19677851	Gypsy	tat	+	AP|tat RT|tat RNaseH|tat INT|tat
Chr5_19909751_19915984	Copia	tork	+	GAG|tork AP|tork INT|tork RT|tork RNaseH|tork
Chr5_2032390_2044602	Gypsy	tat	+	GAG|tat AP|tat RT|tat RNaseH|tat INT|tat
Chr5_20614539_20620727	Copia	tork	+	GAG|tork AP|tork INT|tork RT|tork RNaseH|tork
Chr5_21465432_21471420	Copia	tork	+	GAG|tork AP|tork INT|tork RT|tork RNaseH|tork
Chr5_21531496_21548567	Gypsy	del	+	GAG|del AP|del RT|del RNaseH|del INT|del CHR|retroelement
Chr5_21573736_21578920	Copia	oryco	+	GAG|oryco AP|oryco INT|oryco RT|oryco RNaseH|oryco
Chr5_21660139_21666373	Copia	tork	+	GAG|tork AP|tork INT|tork RT|tork RNaseH|tork
Chr5_22096544_22109702	Gypsy	tat	+	GAG|tat AP|tat RT|tat RNaseH|tat INT|tat
Chr5_2232726_2239173	Copia	tork	+	GAG|tork AP|tork INT|tork RT|tork RNaseH|tork
Chr5_22337515_22349976	Gypsy	tat	+	GAG|tat AP|tat RT|tat RNaseH|tat INT|tat
Chr5_22429955_22435874	Gypsy	reina	+	GAG|reina AP|reina RT|reina RNaseH|reina INT|reina
Chr5_23121520_23131642	Copia	tork	+	GAG|tork AP|tork INT|tork RT|tork RNaseH|tork
Chr5_23261080_23269831	Gypsy	tat	+	GAG|tat AP|tat RT|tat RNaseH|tat INT|tat
Chr5_23323775_23338432	Gypsy	del	+	GAG|del AP|del RT|del RNaseH|del INT|del CHR|retroelement
Chr5_2405013_2416324	Gypsy	tat	+	GAG|tat AP|tat RT|tat RNaseH|tat INT|tat
Chr5_24209136_24220693	Gypsy	del	+	GAG|del AP|del RT|del RNaseH|del INT|del CHR|retroelement
Chr5_2423411_2434715	Gypsy	tat	+	GAG|tat AP|tat RT|tat RNaseH|tat INT|tat
Chr5_24505607_24516888	Gypsy	tat	+	GAG|tat AP|tat RT|tat RNaseH|tat INT|tat
Chr5_2453630_2460052	Copia	tork	+	GAG|tork AP|tork INT|tork RT|tork RNaseH|tork
Chr5_24914838_24924030	Copia	retrofit	+	GAG|retrofit AP|retrofit INT|retrofit RT|retrofit RNaseH|retrofit
Chr5_24975022_24986314	Gypsy	tat	+	GAG|tat AP|tat RT|tat RNaseH|tat INT|tat
Chr5_25132942_25138014	Copia	tork	+	GAG|tork AP|tork INT|tork RT|tork RNaseH|tork
Chr5_25591415_25606048	Gypsy	tat	+	GAG|tat AP|tat RT|tat RNaseH|tat INT|tat
Chr5_25883472_25895253	Gypsy	del	+	GAG|del AP|del RT|del RNaseH|del INT|del CHR|retroelement
Chr5_25998300_26009997	Gypsy	del	+	GAG|del AP|del RT|del RNaseH|del INT|del CHR|retroelement
Chr5_26062735_26077504	Copia	sire	+	GAG|sire AP|sire INT|sire RT|sire RNaseH|sire
Chr5_26206799_26211608	Copia	retrofit	+	GAG|retrofit AP|retrofit INT|retrofit RT|retrofit RNaseH|retrofit
Chr5_2687297_2698578	Gypsy	del	+	GAG|del AP|del RT|del RNaseH|del INT|del CHR|retroelement
Chr5_27185752_27197398	Gypsy	tat	+	GAG|tat AP|tat RT|tat RNaseH|tat INT|tat
Chr5_27269662_27283949	Gypsy	del	+	GAG|del AP|del RT|del RNaseH|del INT|del CHR|retroelement
Chr5_27347312_27353559	Copia	tork	+	GAG|tork AP|tork INT|tork RT|tork RNaseH|tork
Chr5_27608532_27613542	Copia	oryco	+	GAG|oryco AP|oryco INT|oryco RT|oryco RNaseH|oryco
Chr5_2798135_2803729	Copia	tork	+	GAG|tork AP|tork INT|tork RT|tork RNaseH|tork
Chr5_28163613_28169283	Copia	tork	+	GAG|tork AP|tork INT|tork RT|tork RNaseH|tork
Chr5_28456414_28462856	Copia	tork	+	GAG|tork AP|tork INT|tork RT|tork RNaseH|tork
Chr5_28503314_28514178	Gypsy	tat	+	GAG|tat AP|tat RT|tat RNaseH|tat INT|tat
Chr5_28605669_28610418	Copia	retrofit	+	GAG|retrofit AP|retrofit INT|retrofit RT|retrofit RNaseH|retrofit
Chr5_29348803_29355019	Copia	tork	+	GAG|tork AP|tork INT|tork RT|tork RNaseH|tork
Chr5_29433227_29444746	Gypsy	tat	+	AP|tat RT|tat RNaseH|tat INT|tat
Chr5_2952430_2966770	Gypsy	del	-	GAG|del AP|del RT|del RNaseH|del INT|del CHR|retroelement
Chr5_3411345_3416823	Gypsy	mixture	+	GAG|reina AP|reina RT|reina RNaseH|reina INT|reina CHR|retroelement
Chr5_3589987_3602851	Gypsy	tat	+	GAG|tat AP|tat RT|tat RNaseH|tat INT|tat
Chr5_3791157_3797301	Copia	tork	+	GAG|tork AP|tork INT|tork RT|tork RNaseH|tork
Chr5_381701_393511	Gypsy	del	+	GAG|del AP|del RT|del RNaseH|del INT|del CHR|retroelement
Chr5_3860408_3867095	Copia	tork	+	GAG|tork AP|tork INT|tork RT|tork RNaseH|tork
Chr5_3908844_3920917	Gypsy	del	+	GAG|del AP|del RT|del RNaseH|del INT|del CHR|retroelement
Chr5_4033780_4045075	Gypsy	tat	+	GAG|tat AP|tat RT|tat RNaseH|tat INT|tat
Chr5_4519220_4531310	Gypsy	del	+	GAG|del AP|del RT|del RNaseH|del INT|del CHR|retroelement
Chr5_4897647_4903770	Copia	tork	+	GAG|tork AP|tork INT|tork RT|tork RNaseH|tork
Chr5_5007322_5020211	Gypsy	tat	+	GAG|tat AP|tat RT|tat RNaseH|tat INT|tat
Chr5_6033946_6039421	Copia	mixture	+	GAG|retrofit AP|retrofit INT|retrofit RT|tork RNaseH|retrofit
Chr5_6110905_6123431	Gypsy	del	+	GAG|del AP|del RT|del RNaseH|del INT|del CHR|retroelement
Chr5_6178650_6190440	Gypsy	tat	+	GAG|tat AP|tat RT|tat RNaseH|tat INT|tat
Chr5_6240567_6245809	Copia	oryco	+	GAG|oryco AP|oryco INT|oryco RT|oryco RNaseH|oryco
Chr5_6793728_6798271	Copia	tork	+	GAG|tork AP|tork INT|tork RT|tork RNaseH|tork
Chr5_7055452_7060206	Copia	retrofit	+	GAG|retrofit AP|retrofit INT|retrofit RT|retrofit RNaseH|retrofit
Chr5_7105865_7111056	Copia	mixture	+	AP|ty1/copia INT|retrofit RT|tork RNaseH|retrofit
Chr5_726286_737458	Copia	sire	+	GAG|sire AP|sire INT|sire RT|sire RNaseH|sire
Chr5_7461227_7474096	Gypsy	tat	+	GAG|tat AP|tat RT|tat RNaseH|tat INT|tat
Chr5_746183_757493	Gypsy	tat	+	GAG|tat AP|tat RT|tat RNaseH|tat INT|tat
Chr5_7486362_7491161	Copia	retrofit	+	GAG|retrofit AP|retrofit INT|retrofit RT|retrofit RNaseH|retrofit
Chr5_7540755_7549456	Gypsy	del	+	GAG|del AP|del RT|del RNaseH|del INT|del CHR|retroelement
Chr5_7732460_7744102	Gypsy	tat	+	GAG|tat AP|tat RT|tat RNaseH|tat INT|tat
Chr5_7866619_7879349	Gypsy	tat	+	GAG|tat AP|tat RT|tat RNaseH|tat INT|tat
Chr5_7881931_7893394	Gypsy	tat	+	AP|tat RT|tat RNaseH|tat INT|tat
Chr5_8058653_8064628	Gypsy	reina	+	GAG|reina AP|reina RT|reina RNaseH|reina INT|reina
Chr5_8204433_8215773	Gypsy	mixture	+	GAG|athila AP|tat RT|tat RNaseH|tat INT|tat
Chr5_8563889_8570816	Copia	tork	+	GAG|tork AP|tork INT|tork RT|tork RNaseH|tork
Chr5_8718643_8728883	Gypsy	del	+	GAG|del AP|del RT|del RNaseH|del INT|del CHR|retroelement
Chr5_8736204_8748021	Gypsy	del	+	GAG|del AP|del RT|del RNaseH|del INT|del CHR|retroelement
Chr5_8823571_8836422	Gypsy	del	+	GAG|del AP|del RT|del RNaseH|del INT|del CHR|retroelement
Chr5_8921584_8927800	Copia	tork	+	GAG|tork AP|tork INT|tork RT|tork RNaseH|tork
Chr5_8928956_8943829	Gypsy	tat	+	GAG|tat AP|tat RT|tat RNaseH|tat INT|tat
Chr5_9021860_9033163	Gypsy	tat	+	GAG|tat AP|tat RT|tat RNaseH|tat INT|tat
Chr5_9272143_9286942	Gypsy	del	+	GAG|del AP|del RT|del RNaseH|del INT|del CHR|retroelement
Chr5_9405590_9417320	Gypsy	del	+	GAG|del AP|del RT|del RNaseH|del INT|del CHR|retroelement
Chr5_9480323_9491621	Gypsy	tat	+	GAG|tat AP|tat RT|tat RNaseH|tat INT|tat
Chr5_9501751_9513821	Gypsy	del	+	GAG|del AP|del RT|del RNaseH|del INT|del CHR|retroelement
Chr5_9556421_9568474	Gypsy	del	+	GAG|del AP|del RT|del RNaseH|del INT|del CHR|retroelement
Chr5_9598475_9610182	Gypsy	del	+	GAG|del AP|del RT|del RNaseH|del INT|del CHR|retroelement
Chr5_9664076_9673795	Gypsy	del	+	GAG|del AP|del RT|del RNaseH|del INT|del CHR|retroelement
Chr5_9695365_9707424	Gypsy	del	+	GAG|del AP|del RT|del RNaseH|del INT|del CHR|retroelement
Chr5_9758111_9768883	Gypsy	del	+	GAG|del AP|del RT|del RNaseH|del INT|del CHR|retroelement
Chr5_9820325_9832810	Gypsy	del	+	GAG|del AP|del RT|del RNaseH|del INT|del CHR|retroelement
Chr6_10157072_10168277	Gypsy	del	+	GAG|del AP|del RT|del RNaseH|del INT|del CHR|retroelement
Chr6_10531196_10543685	Gypsy	del	+	GAG|del AP|del RT|del RNaseH|del INT|del CHR|retroelement
Chr6_10661606_10673593	Gypsy	del	+	GAG|del AP|del RT|del RNaseH|del INT|del CHR|retroelement
Chr6_10763043_10776450	Gypsy	tat	+	GAG|tat AP|tat RT|tat RNaseH|tat INT|tat
Chr6_10825897_10831941	Copia	tork	+	GAG|tork AP|tork INT|tork RT|tork RNaseH|tork
Chr6_10942740_10954408	Gypsy	del	+	GAG|del AP|del RT|del RNaseH|del INT|del CHR|retroelement
Chr6_11254857_11261214	Copia	tork	+	GAG|tork AP|tork INT|tork RT|tork RNaseH|tork
Chr6_11379376_11388233	Gypsy	tat	+	GAG|tat AP|tat RT|tat RNaseH|tat INT|tat
Chr6_11393344_11399391	Copia	tork	+	GAG|tork AP|tork INT|tork RT|tork RNaseH|tork
Chr6_11409053_11421030	Gypsy	del	+	GAG|del AP|del RT|del RNaseH|del INT|del CHR|retroelement
Chr6_11844884_11858307	Gypsy	tat	+	GAG|tat AP|tat RT|tat RNaseH|tat INT|tat
Chr6_11894202_11908926	Gypsy	tat	+	GAG|tat AP|tat RT|tat RNaseH|tat INT|tat
Chr6_11936721_11945979	Copia	tork	+	GAG|tork AP|tork INT|tork RT|tork RNaseH|tork
Chr6_12291810_12297220	Gypsy	mixture	+	GAG|reina AP|reina RT|reina RNaseH|reina INT|reina CHR|retroelement
Chr6_1234752_1244843	Gypsy	del	+	GAG|del AP|del RT|del RNaseH|del INT|del CHR|retroelement
Chr6_12391350_12402816	Gypsy	tat	+	AP|tat RT|tat RNaseH|tat INT|tat
Chr6_12479046_12488055	Gypsy	del	+	GAG|del AP|del RT|del RNaseH|del INT|del CHR|retroelement
Chr6_12543239_12552745	Copia	tork	+	GAG|tork AP|tork INT|tork RT|tork RNaseH|tork
Chr6_12716227_12724251	Gypsy	del	+	GAG|del AP|del RT|del RNaseH|del INT|del CHR|retroelement
Chr6_12901943_12911139	Gypsy	del	+	GAG|del AP|del RT|del RNaseH|del INT|del CHR|retroelement
Chr6_13257006_13268421	Gypsy	tat	+	GAG|tat AP|tat RT|tat RNaseH|tat INT|tat
Chr6_13447999_13459317	Gypsy	tat	+	GAG|tat AP|tat RT|tat RNaseH|tat INT|tat
Chr6_13707055_13712810	Copia	oryco	+	GAG|oryco AP|oryco INT|oryco RT|oryco RNaseH|oryco
Chr6_13937683_13943916	Copia	tork	+	GAG|tork AP|tork INT|tork RT|tork RNaseH|tork
Chr6_14103289_14113773	Gypsy	tat	+	GAG|tat AP|tat RT|tat RNaseH|tat INT|tat
Chr6_14242203_14253508	Gypsy	del	+	GAG|del AP|del RT|del RNaseH|del INT|del CHR|retroelement
Chr6_14254977_14260822	Copia	tork	+	GAG|tork AP|tork INT|tork RT|tork RNaseH|tork
Chr6_14458175_14467002	Gypsy	del	+	GAG|del AP|del RT|del RNaseH|del INT|del CHR|retroelement
Chr6_14482708_14494245	Gypsy	tat	+	GAG|tat AP|tat RT|tat RNaseH|tat INT|tat
Chr6_14558026_14568341	Gypsy	tat	+	GAG|tat AP|tat RT|tat RNaseH|tat INT|tat
Chr6_14618095_14629784	Gypsy	del	+	GAG|del AP|del RT|del RNaseH|del INT|del CHR|retroelement
Chr6_14856796_14866253	Gypsy	tat	+	AP|tat RT|tat RNaseH|tat INT|tat
Chr6_14898655_14910916	Gypsy	tat	+	GAG|tat AP|tat RT|tat RNaseH|tat INT|tat
Chr6_15022038_15035217	Copia	sire	+	AP|sire INT|sire RT|sire RNaseH|sire
Chr6_15043751_15059666	Gypsy	tat	+	GAG|tat AP|tat RT|tat RNaseH|tat INT|tat
Chr6_15073669_15084203	Gypsy	del	+	GAG|del AP|del RT|del RNaseH|del INT|del CHR|retroelement
Chr6_15097573_15109224	Copia	sire	+	GAG|sire AP|sire INT|sire RT|sire RNaseH|sire
Chr6_15135910_15143658	Gypsy	crm	+	GAG|crm AP|crm RT|crm RNaseH|crm INT|crm
Chr6_15585571_15595171	Gypsy	crm	+	GAG|crm AP|crm RT|crm RNaseH|crm INT|crm
Chr6_15952577_15967847	Gypsy	tat	+	GAG|tat AP|tat RT|tat RNaseH|tat INT|tat
Chr6_15975902_15982554	Copia	tork	+	GAG|tork AP|tork INT|tork RT|tork RNaseH|tork
Chr6_16075628_16084493	Gypsy	tat	+	GAG|tat AP|tat RT|tat RNaseH|tat INT|tat
Chr6_16094347_16099532	Copia	oryco	+	GAG|oryco AP|oryco INT|oryco RT|oryco RNaseH|oryco
Chr6_16488255_16499941	Gypsy	tat	+	GAG|tat AP|tat RT|tat RNaseH|tat INT|tat
Chr6_17059816_17065798	Gypsy	reina	+	GAG|reina AP|reina RT|reina RNaseH|reina INT|reina
Chr6_17081419_17092721	Gypsy	tat	+	GAG|tat AP|tat RT|tat RNaseH|tat INT|tat
Chr6_17136034_17139824	Copia	oryco	+	AP|oryco INT|oryco RT|oryco RNaseH|oryco
Chr6_17228165_17238457	Gypsy	tat	+	GAG|tat AP|tat RT|tat RNaseH|tat INT|tat
Chr6_17323147_17336875	Gypsy	tat	+	GAG|tat AP|tat RT|tat RNaseH|tat INT|tat
Chr6_17414898_17425989	Gypsy	del	+	GAG|del AP|del RT|del RNaseH|del INT|del CHR|retroelement
Chr6_17638699_17647243	Gypsy	mixture	+	GAG|athila AP|tat RT|tat RNaseH|tat INT|tat
Chr6_17894620_17900419	Copia	tork	+	GAG|tork AP|tork INT|tork RT|tork RNaseH|tork
Chr6_18043035_18055134	Gypsy	del	+	GAG|del AP|del RT|del RNaseH|del INT|del CHR|retroelement
Chr6_18098539_18110582	Gypsy	del	+	GAG|del AP|del RT|del RNaseH|del INT|del CHR|retroelement
Chr6_18170683_18182457	Gypsy	tat	+	AP|tat RT|tat RNaseH|tat INT|tat
Chr6_18289259_18304508	Gypsy	del	+	GAG|del AP|del RT|del RNaseH|del INT|del CHR|retroelement
Chr6_18311908_18325756	Gypsy	del	+	GAG|del AP|del RT|del RNaseH|del INT|del CHR|retroelement
Chr6_18385388_18396956	Gypsy	del	+	GAG|del AP|del RT|del RNaseH|del INT|del CHR|retroelement
Chr6_18426745_18436114	Gypsy	del	+	GAG|del AP|del RT|del RNaseH|del INT|del CHR|retroelement
Chr6_18535133_18544307	Gypsy	del	+	GAG|del AP|del RT|del RNaseH|del INT|del
Chr6_18691758_18703351	Gypsy	del	+	GAG|del AP|del RT|del RNaseH|del INT|del CHR|retroelement
Chr6_18887245_18899209	Gypsy	del	+	GAG|del AP|del RT|del RNaseH|del INT|del CHR|retroelement
Chr6_19080831_19091842	Gypsy	del	+	GAG|del AP|del RT|del RNaseH|del INT|del CHR|retroelement
Chr6_19132228_19146833	Gypsy	del	+	GAG|del AP|del RT|del RNaseH|del INT|del CHR|retroelement
Chr6_19213367_19225426	Gypsy	del	+	GAG|del AP|del RT|del RNaseH|del INT|del CHR|retroelement
Chr6_19364481_19375796	Gypsy	tat	+	GAG|tat AP|tat RT|tat RNaseH|tat INT|tat
Chr6_19380104_19391468	Gypsy	tat	+	GAG|tat AP|tat RT|tat RNaseH|tat INT|tat
Chr6_19633680_19646697	Gypsy	del	+	GAG|del AP|del RT|del RNaseH|del INT|del CHR|retroelement
Chr6_19712006_19723300	Gypsy	tat	+	GAG|tat AP|tat RT|tat RNaseH|tat INT|tat
Chr6_19767007_19778251	Gypsy	del	+	GAG|del AP|del RT|del RNaseH|del INT|del CHR|retroelement
Chr6_19843971_19849803	Copia	tork	+	GAG|tork AP|tork INT|tork RT|tork RNaseH|tork
Chr6_19884028_19897628	Gypsy	tat	+	GAG|tat AP|tat RT|tat RNaseH|tat INT|tat
Chr6_19931110_19942024	Gypsy	tat	+	GAG|tat AP|tat RT|tat RNaseH|tat INT|tat
Chr6_20386107_20398376	Gypsy	del	+	GAG|del AP|del RT|del RNaseH|del INT|del CHR|retroelement
Chr6_20534007_20541773	Gypsy	crm	+	GAG|crm AP|crm RT|crm RNaseH|crm INT|crm
Chr6_20543244_20554915	Gypsy	del	+	GAG|del AP|del RT|del RNaseH|del INT|del CHR|retroelement
Chr6_20879714_20884534	Copia	tork	+	GAG|tork AP|tork INT|tork RT|tork RNaseH|tork
Chr6_20908905_20914754	Copia	tork	+	GAG|tork AP|tork INT|tork RT|tork RNaseH|tork
Chr6_21052026_21060201	Gypsy	reina	+	GAG|reina AP|reina RT|reina RNaseH|reina INT|reina
Chr6_21137029_21150878	Gypsy	tat	+	GAG|tat AP|tat RT|tat RNaseH|tat INT|tat
Chr6_21151323_21160925	Gypsy	del	+	GAG|del AP|del RT|del RNaseH|del INT|del CHR|retroelement
Chr6_21193633_21203709	Gypsy	del	+	GAG|del AP|del RT|del RNaseH|del INT|del CHR|retroelement
Chr6_21260988_21267090	Copia	tork	+	GAG|tork AP|tork INT|tork RT|tork RNaseH|tork
Chr6_21464808_21476812	Gypsy	del	+	GAG|del AP|del RT|del RNaseH|del INT|del CHR|retroelement
Chr6_21861819_21874712	Gypsy	tat	+	GAG|tat AP|tat RT|tat RNaseH|tat INT|tat
Chr6_21903993_21916864	Gypsy	tat	+	GAG|tat AP|tat RT|tat RNaseH|tat INT|tat
Chr6_22010302_22015026	Copia	retrofit	+	GAG|retrofit AP|retrofit INT|retrofit RT|retrofit RNaseH|retrofit
Chr6_22101240_22115053	Copia	sire	+	AP|sire INT|sire RT|sire RNaseH|sire
Chr6_22162249_22172832	Gypsy	tat	+	GAG|tat AP|tat RT|tat RNaseH|tat INT|tat
Chr6_22338250_22349531	Gypsy	tat	+	GAG|tat AP|tat RT|tat RNaseH|tat INT|tat
Chr6_22753870_22765146	Gypsy	tat	+	GAG|tat AP|tat RT|tat RNaseH|tat INT|tat
Chr6_22804889_22810031	Copia	mixture	+	AP|ty1/copia INT|retrofit RT|tork RNaseH|retrofit
Chr6_23043412_23049644	Copia	tork	+	GAG|tork AP|tork INT|tork RT|tork RNaseH|tork
Chr6_23320834_23332004	Gypsy	tat	+	GAG|tat AP|tat RT|tat RNaseH|tat INT|tat
Chr6_2343094_2348752	Gypsy	mixture	+	GAG|reina AP|reina RT|reina RNaseH|reina INT|reina CHR|retroelement
Chr6_23662766_23668154	Gypsy	mixture	+	GAG|reina AP|del RT|reina RNaseH|reina INT|reina
Chr6_23977922_23987705	Gypsy	del	+	GAG|del AP|del RT|del RNaseH|del INT|del CHR|retroelement
Chr6_24467831_24473505	Copia	tork	+	GAG|tork AP|tork INT|tork RT|tork RNaseH|tork
Chr6_24545796_24552079	Copia	tork	+	GAG|tork AP|tork INT|tork RT|tork RNaseH|tork
Chr6_2463427_2468994	Copia	tork	+	GAG|tork AP|tork INT|tork RT|tork RNaseH|tork
Chr6_24750293_24759830	Copia	sire	+	GAG|sire AP|sire INT|sire RT|sire RNaseH|sire
Chr6_24824453_24829262	Copia	mixture	+	AP|retrofit INT|copia RT|retrofit RNaseH|retrofit
Chr6_24968650_24974397	Copia	oryco	+	GAG|oryco AP|oryco INT|oryco RT|oryco RNaseH|oryco
Chr6_25373582_25384837	Gypsy	del	+	GAG|del AP|del RT|del RNaseH|del INT|del CHR|retroelement
Chr6_2568142_2573731	Copia	oryco	+	GAG|oryco AP|oryco INT|oryco RT|oryco RNaseH|oryco
Chr6_25935465_25941451	Gypsy	reina	+	GAG|reina AP|reina RT|reina RNaseH|reina INT|reina
Chr6_26011741_26017062	Copia	tork	+	GAG|tork AP|tork INT|tork RT|tork RNaseH|tork
Chr6_26047145_26058542	Gypsy	tat	+	GAG|tat AP|tat RT|tat RNaseH|tat INT|tat
Chr6_2613453_2622723	Gypsy	del	+	GAG|del AP|del RT|del RNaseH|del INT|del CHR|retroelement
Chr6_2664850_2677749	Gypsy	tat	+	GAG|tat AP|tat RT|tat RNaseH|tat INT|tat
Chr6_26727186_26732283	Copia	tork	+	GAG|tork AP|tork INT|tork RT|tork RNaseH|tork
Chr6_27350282_27363204	Gypsy	tat	+	GAG|tat AP|tat RT|tat RNaseH|tat INT|tat
Chr6_27534520_27545769	Gypsy	tat	+	GAG|tat AP|tat RT|tat RNaseH|tat INT|tat
Chr6_27686582_27699475	Gypsy	tat	+	GAG|tat AP|tat RT|tat RNaseH|tat INT|tat
Chr6_27770706_27776332	Gypsy	reina	+	GAG|reina AP|reina RT|reina RNaseH|reina INT|reina
Chr6_27980307_27991971	Gypsy	tat	+	GAG|tat AP|tat RT|tat RNaseH|tat INT|tat
Chr6_28242229_28253565	Gypsy	tat	+	GAG|tat AP|tat RT|tat RNaseH|tat INT|tat
Chr6_28417191_28423425	Copia	tork	+	GAG|tork AP|tork INT|tork RT|tork RNaseH|tork
Chr6_28600822_28613913	Gypsy	tat	+	GAG|tat AP|tat RT|tat RNaseH|tat INT|tat
Chr6_28708571_28719854	Gypsy	tat	+	GAG|tat AP|tat RT|tat RNaseH|tat INT|tat
Chr6_28882379_28887260	Copia	retrofit	+	GAG|retrofit AP|retrofit INT|retrofit RT|retrofit RNaseH|retrofit
Chr6_29299594_29314342	Gypsy	del	+	GAG|del AP|del RT|del RNaseH|del INT|del CHR|retroelement
Chr6_29317414_29328714	Gypsy	tat	+	GAG|tat AP|tat RT|tat RNaseH|tat INT|tat
Chr6_29389158_29395598	Copia	tork	+	GAG|tork AP|tork INT|tork RT|tork RNaseH|tork
Chr6_29601730_29614208	Gypsy	del	+	GAG|del AP|del RT|del RNaseH|del INT|del CHR|retroelement
Chr6_29856634_29869713	Copia	tork	+	GAG|tork AP|tork INT|tork RT|tork RNaseH|tork
Chr6_29899554_29905070	Copia	mixture	+	AP|ty1/copia INT|retrofit RT|tork RNaseH|retrofit
Chr6_30075590_30083717	Gypsy	tat	+	GAG|tat AP|tat RT|tat RNaseH|tat INT|tat
Chr6_30423516_30434825	Gypsy	tat	+	GAG|tat AP|tat RT|tat RNaseH|tat INT|tat
Chr6_3207031_3212695	Copia	oryco	+	GAG|oryco AP|oryco INT|oryco RT|oryco RNaseH|oryco
Chr6_3491028_3503036	Gypsy	del	+	GAG|del AP|del RT|del RNaseH|del INT|del CHR|retroelement
Chr6_3612858_3624479	Gypsy	del	+	GAG|del AP|del RT|del RNaseH|del INT|del CHR|retroelement
Chr6_4558063_4562775	Gypsy	mixture	+	GAG|reina AP|reina RT|reina RNaseH|reina INT|reina CHR|retroelement
Chr6_6065675_6078060	Copia	sire	+	GAG|sire AP|sire INT|sire RT|sire RNaseH|sire
Chr6_6115105_6130470	Gypsy	tat	+	GAG|tat AP|tat RT|tat RNaseH|tat INT|tat
Chr6_6938004_6949352	Gypsy	tat	+	GAG|tat AP|tat RT|tat RNaseH|tat INT|tat
Chr6_7195960_7201633	Gypsy	reina	+	GAG|reina AP|reina RT|reina RNaseH|reina INT|reina
Chr6_7388595_7393660	Copia	retrofit	+	GAG|retrofit AP|retrofit INT|retrofit RT|retrofit RNaseH|retrofit
Chr6_7469718_7474525	Copia	retrofit	+	GAG|retrofit AP|retrofit INT|retrofit RT|retrofit RNaseH|retrofit
Chr6_7878929_7890228	Gypsy	tat	+	GAG|tat AP|tat RT|tat RNaseH|tat INT|tat
Chr6_7890759_7903350	Gypsy	tat	+	GAG|tat AP|tat RT|tat RNaseH|tat INT|tat
Chr6_8211045_8222378	Gypsy	tat	+	GAG|tat AP|tat RT|tat RNaseH|tat INT|tat
Chr6_8582749_8592832	Gypsy	del	+	GAG|del AP|del RT|del RNaseH|del INT|del CHR|retroelement
Chr6_8774633_8780444	Copia	tork	+	GAG|tork AP|tork INT|tork RT|tork RNaseH|tork
Chr6_9232389_9245288	Gypsy	tat	+	GAG|tat AP|tat RT|tat RNaseH|tat INT|tat
Chr6_9292705_9305525	Gypsy	tat	+	GAG|tat AP|tat RT|tat RNaseH|tat INT|tat
Chr6_9785941_9797999	Gypsy	del	+	GAG|del AP|del RT|del RNaseH|del INT|del CHR|retroelement
Chr6_9889341_9895467	Copia	tork	+	GAG|tork AP|tork INT|tork RT|tork RNaseH|tork
Chr7_10023701_10029862	Copia	tork	+	GAG|tork AP|tork INT|tork RT|tork RNaseH|tork
Chr7_10043486_10055221	Gypsy	del	+	GAG|del AP|del RT|del RNaseH|del INT|del CHR|retroelement
Chr7_10317320_10325401	Copia	sire	+	AP|sire INT|sire RT|sire RNaseH|sire
Chr7_10525519_10537584	Gypsy	del	+	GAG|del AP|del RT|del RNaseH|del INT|del CHR|retroelement
Chr7_10943863_10950708	Copia	sire	+	GAG|sire AP|sire INT|sire RT|sire RNaseH|sire
Chr7_10999820_11005998	Copia	tork	+	GAG|tork AP|tork INT|tork RT|tork RNaseH|tork
Chr7_11041307_11052060	Gypsy	crm	+	GAG|crm AP|crm RT|crm RNaseH|crm INT|crm
Chr7_11189908_11197992	Copia	sire	+	GAG|sire AP|sire INT|sire RT|sire RNaseH|sire
Chr7_11227404_11233065	Copia	oryco	+	GAG|oryco AP|oryco INT|oryco RT|oryco RNaseH|oryco
Chr7_11723275_11735940	Gypsy	del	+	GAG|del AP|del RT|del RNaseH|del INT|del CHR|retroelement
Chr7_11813234_11824814	Gypsy	del	+	GAG|del AP|del RT|del RNaseH|del INT|del CHR|retroelement
Chr7_11970317_11981343	Gypsy	tat	+	GAG|tat AP|tat RT|tat RNaseH|tat INT|tat
Chr7_12340173_12351123	Gypsy	del	+	GAG|del AP|del RT|del RNaseH|del INT|del CHR|retroelement
Chr7_12586331_12597090	Gypsy	del	+	GAG|del AP|del RT|del RNaseH|del INT|del CHR|retroelement
Chr7_12605551_12615147	Copia	sire	+	GAG|sire AP|sire INT|sire RT|sire RNaseH|sire
Chr7_12995799_13009163	Gypsy	tat	+	GAG|tat AP|tat RT|tat RNaseH|tat INT|tat
Chr7_13011856_13024082	Gypsy	tat	+	GAG|tat AP|tat RT|tat RNaseH|tat INT|tat
Chr7_13086709_13098209	Copia	sire	+	GAG|sire AP|sire INT|sire RT|sire RNaseH|sire
Chr7_13260333_13267161	Copia	tork	+	GAG|tork AP|tork INT|tork RT|tork RNaseH|tork
Chr7_13660120_13669772	Gypsy	tat	+	GAG|tat AP|tat RT|tat RNaseH|tat INT|tat
Chr7_13824483_13835839	Gypsy	tat	+	AP|tat RT|tat RNaseH|tat INT|tat
Chr7_13843791_13850694	Copia	tork	+	GAG|tork AP|tork INT|tork RT|tork RNaseH|tork
Chr7_13912582_13922073	Gypsy	del	+	GAG|del AP|del RT|del RNaseH|del INT|del CHR|retroelement
Chr7_13953515_13963902	Gypsy	del	+	GAG|del AP|del RT|del RNaseH|del INT|del CHR|retroelement
Chr7_14126745_14143065	Gypsy	crm	+	GAG|crm AP|crm RT|crm RNaseH|crm INT|crm
Chr7_1419000_1431363	Gypsy	del	+	GAG|del AP|del RT|del RNaseH|del INT|del CHR|retroelement
Chr7_14320124_14331718	Gypsy	tat	+	GAG|tat AP|tat RT|tat RNaseH|tat INT|tat
Chr7_14435159_14438985	Gypsy	del	+	AP|del RT|del RNaseH|del INT|del
Chr7_14464191_14474007	Gypsy	del	+	GAG|del AP|del RT|del RNaseH|del INT|del CHR|retroelement
Chr7_14494978_14499344	Copia	oryco	+	AP|oryco INT|oryco RT|oryco RNaseH|oryco
Chr7_1458280_1470560	Gypsy	del	+	GAG|del AP|del RT|del RNaseH|del INT|del CHR|retroelement
Chr7_14651782_14658449	Copia	tork	+	GAG|tork AP|tork INT|tork RT|tork RNaseH|tork
Chr7_14683330_14688182	Copia	mixture	+	AP|ty1/copia INT|retrofit RT|tork RNaseH|retrofit
Chr7_14691117_14702611	Gypsy	tat	+	GAG|tat AP|tat RT|tat RNaseH|tat INT|tat
Chr7_1484849_1491089	Copia	tork	+	GAG|tork AP|tork INT|tork RT|tork RNaseH|tork
Chr7_14928252_14939585	Gypsy	tat	+	GAG|tat AP|tat RT|tat RNaseH|tat INT|tat
Chr7_15081844_15093723	Gypsy	del	+	GAG|del AP|del RT|del RNaseH|del INT|del CHR|retroelement
Chr7_15111320_15120714	Gypsy	tat	+	AP|tat RT|tat RNaseH|tat INT|tat
Chr7_1516888_1522955	Copia	tork	+	GAG|tork AP|tork INT|tork RT|tork RNaseH|tork
Chr7_15626584_15631837	Copia	retrofit	+	GAG|retrofit AP|retrofit INT|retrofit RT|retrofit RNaseH|retrofit
Chr7_15682925_15690816	Gypsy	crm	+	GAG|crm AP|crm RT|crm RNaseH|crm INT|crm
Chr7_15693085_15702267	Copia	sire	+	GAG|sire AP|sire INT|sire RT|sire RNaseH|sire
Chr7_15804807_15818646	Gypsy	tat	+	GAG|tat AP|tat RT|tat RNaseH|tat INT|tat
Chr7_16174949_16188418	Gypsy	mixture	+	GAG|athila AP|tat RT|tat RNaseH|tat INT|tat
Chr7_16234084_16248321	Gypsy	tat	+	GAG|tat AP|tat RT|tat RNaseH|tat INT|tat
Chr7_16277592_16284316	Copia	tork	+	GAG|tork AP|tork INT|tork RT|tork RNaseH|tork
Chr7_16473533_16478799	Gypsy	mixture	+	GAG|reina AP|reina RT|reina RNaseH|reina INT|reina CHR|retroelement
Chr7_16571935_16583625	Copia	sire	+	GAG|sire AP|sire INT|sire RT|sire RNaseH|sire
Chr7_1657442_1663459	Copia	tork	+	GAG|tork AP|tork INT|tork RT|tork RNaseH|tork
Chr7_16681588_16692715	Gypsy	del	+	GAG|del AP|del RT|del RNaseH|del INT|del CHR|retroelement
Chr7_16780871_16795507	Gypsy	tat	+	AP|tat RT|tat RNaseH|tat INT|tat
Chr7_16817256_16831801	Gypsy	del	+	GAG|del AP|del RT|del RNaseH|del INT|del CHR|retroelement
Chr7_17053964_17059424	Copia	tork	+	GAG|tork AP|tork INT|tork RT|tork RNaseH|tork
Chr7_17137294_17143292	Copia	tork	+	GAG|tork AP|tork INT|tork RT|tork RNaseH|tork
Chr7_1730030_1741358	Gypsy	del	+	GAG|del AP|del RT|del RNaseH|del INT|del CHR|retroelement
Chr7_17329765_17334680	Copia	retrofit	+	GAG|retrofit AP|retrofit INT|retrofit RT|retrofit RNaseH|retrofit
Chr7_17365256_17370731	Copia	mixture	+	GAG|retrofit AP|retrofit INT|retrofit RT|tork RNaseH|retrofit
Chr7_17577261_17593009	Gypsy	del	+	GAG|del AP|del RT|del RNaseH|del INT|del CHR|retroelement
Chr7_17668687_17674903	Copia	tork	+	GAG|tork AP|tork INT|tork RT|tork RNaseH|tork
Chr7_17697703_17709704	Gypsy	tat	+	GAG|tat AP|tat RT|tat RNaseH|tat INT|tat
Chr7_17931292_17944667	Gypsy	del	+	GAG|del AP|del RT|del RNaseH|del INT|del CHR|retroelement
Chr7_18007595_18019345	Gypsy	del	+	GAG|del AP|del RT|del RNaseH|del INT|del CHR|retroelement
Chr7_18087806_18099110	Gypsy	tat	+	GAG|tat AP|tat RT|tat RNaseH|tat INT|tat
Chr7_18188027_18198949	Gypsy	del	+	GAG|del AP|del RT|del RNaseH|del INT|del CHR|retroelement
Chr7_18273794_18285878	Gypsy	del	+	GAG|del AP|del RT|del RNaseH|del INT|del CHR|retroelement
Chr7_18291876_18304468	Gypsy	del	+	GAG|del AP|del RT|del RNaseH|del INT|del CHR|retroelement
Chr7_18438177_18450787	Gypsy	tat	+	GAG|tat AP|tat RT|tat RNaseH|tat INT|tat
Chr7_18750075_18759565	Copia	tork	+	GAG|tork AP|tork INT|tork RT|tork RNaseH|tork
Chr7_18813960_18818142	Copia	mixture	+	AP|ty1/copia INT|retrofit RT|tork RNaseH|retrofit
Chr7_19011713_19023026	Gypsy	tat	+	GAG|tat AP|tat RT|tat RNaseH|tat INT|tat
Chr7_19112074_19118317	Copia	tork	+	GAG|tork AP|tork INT|tork RT|tork RNaseH|tork
Chr7_19473916_19479384	Gypsy	mixture	+	GAG|reina AP|reina RT|reina RNaseH|reina INT|reina CHR|retroelement
Chr7_19989494_19995168	Gypsy	reina	+	GAG|reina AP|reina RT|reina RNaseH|reina INT|reina
Chr7_20019151_20031499	Gypsy	del	+	GAG|del AP|del RT|del RNaseH|del INT|del CHR|retroelement
Chr7_20641781_20646966	Copia	oryco	+	GAG|oryco AP|oryco INT|oryco RT|oryco RNaseH|oryco
Chr7_20681231_20686653	Gypsy	mixture	+	GAG|reina AP|reina RT|reina RNaseH|reina INT|reina CHR|retroelement
Chr7_20853360_20866260	Gypsy	tat	+	GAG|tat AP|tat RT|tat RNaseH|tat INT|tat
Chr7_20890286_20896506	Copia	tork	+	GAG|tork AP|tork INT|tork RT|tork RNaseH|tork
Chr7_21532166_21538448	Copia	tork	+	GAG|tork AP|tork INT|tork RT|tork RNaseH|tork
Chr7_22160366_22166573	Copia	tork	+	GAG|tork AP|tork INT|tork RT|tork RNaseH|tork
Chr7_22736762_22748382	Copia	sire	+	GAG|sire AP|sire INT|sire RT|sire RNaseH|sire
Chr7_23015835_23027191	Gypsy	del	+	GAG|del AP|del RT|del RNaseH|del INT|del CHR|retroelement
Chr7_23030275_23042361	Gypsy	del	+	GAG|del AP|del RT|del RNaseH|del INT|del CHR|retroelement
Chr7_23485874_23490699	Copia	retrofit	+	GAG|retrofit AP|retrofit INT|retrofit RT|retrofit RNaseH|retrofit
Chr7_23590115_23596339	Copia	tork	+	GAG|tork AP|tork INT|tork RT|tork RNaseH|tork
Chr7_23774077_23780475	Copia	tork	+	GAG|tork AP|tork INT|tork RT|tork RNaseH|tork
Chr7_2382043_2387084	Copia	oryco	+	GAG|oryco AP|oryco INT|oryco RT|oryco RNaseH|oryco
Chr7_24040474_24051874	Gypsy	tat	+	AP|tat RT|tat RNaseH|tat INT|tat
Chr7_24794993_24800348	Copia	mixture	+	GAG|retrofit AP|ty1/copia INT|retrofit RT|tork RNaseH|retrofit
Chr7_24853430_24857443	Copia	mixture	+	AP|ty1/copia INT|tork RT|tork RNaseH|tork
Chr7_24864725_24876527	Gypsy	del	+	GAG|del AP|del RT|del RNaseH|del INT|del CHR|retroelement
Chr7_2496901_2502174	Copia	oryco	+	GAG|oryco AP|oryco INT|oryco RT|oryco RNaseH|oryco
Chr7_25169765_25182709	Gypsy	tat	+	GAG|tat AP|tat RT|tat RNaseH|tat INT|tat
Chr7_25573295_25579529	Copia	tork	+	GAG|tork AP|tork INT|tork RT|tork RNaseH|tork
Chr7_2627858_2633101	Copia	oryco	+	GAG|oryco AP|oryco INT|oryco RT|oryco RNaseH|oryco
Chr7_26520593_26527009	Copia	tork	+	GAG|tork AP|tork INT|tork RT|tork RNaseH|tork
Chr7_26567741_26579035	Gypsy	tat	+	GAG|tat AP|tat RT|tat RNaseH|tat INT|tat
Chr7_26694787_26698916	Copia	mixture	+	AP|ty1/copia INT|retrofit RT|tork RNaseH|retrofit
Chr7_268271_281913	Gypsy	del	+	GAG|del AP|del RT|del RNaseH|del INT|del CHR|retroelement
Chr7_26862099_26873404	Gypsy	tat	+	GAG|tat AP|tat RT|tat RNaseH|tat INT|tat
Chr7_27088357_27093431	Copia	retrofit	+	AP|retrofit INT|retrofit RT|retrofit RNaseH|retrofit
Chr7_27218593_27232645	Gypsy	del	+	GAG|del AP|del RT|del RNaseH|del INT|del CHR|retroelement
Chr7_27254908_27266204	Gypsy	tat	+	GAG|tat AP|tat RT|tat RNaseH|tat INT|tat
Chr7_28024259_28037123	Gypsy	tat	+	GAG|tat AP|tat RT|tat RNaseH|tat INT|tat
Chr7_28510602_28521898	Gypsy	tat	+	GAG|tat AP|tat RT|tat RNaseH|tat INT|tat
Chr7_28662840_28668488	Gypsy	reina	+	GAG|reina AP|reina RT|reina RNaseH|reina INT|reina
Chr7_2894878_2905416	Gypsy	del	+	GAG|del AP|del RT|del RNaseH|del INT|del CHR|retroelement
Chr7_2907700_2919763	Gypsy	del	+	GAG|del AP|del RT|del RNaseH|del INT|del CHR|retroelement
Chr7_29366258_29369566	Copia	mixture	+	GAG|retrofit AP|retrofit INT|retrofit RT|sire RNaseH|retrofit
Chr7_29598271_29612377	Gypsy	tat	+	GAG|tat AP|tat RT|tat RNaseH|tat INT|tat
Chr7_29640107_29650858	Gypsy	tat	+	GAG|tat AP|tat RT|tat RNaseH|tat INT|tat
Chr7_3045516_3056822	Gypsy	tat	+	GAG|tat AP|tat RT|tat RNaseH|tat INT|tat
Chr7_3090355_3101661	Gypsy	tat	+	GAG|tat AP|tat RT|tat RNaseH|tat INT|tat
Chr7_4242614_4247815	Gypsy	mixture	+	GAG|reina AP|del RT|reina RNaseH|reina INT|reina CHR|retroelement
Chr7_4412159_4418597	Copia	tork	+	GAG|tork AP|tork INT|tork RT|tork RNaseH|tork
Chr7_4445907_4454894	Gypsy	reina	+	GAG|reina AP|reina RT|reina RNaseH|reina INT|reina
Chr7_4626438_4638132	Gypsy	tat	+	GAG|tat AP|tat RT|tat RNaseH|tat INT|tat
Chr7_5194920_5200478	Copia	mixture	+	AP|ty1/copia INT|retrofit RT|tork RNaseH|retrofit
Chr7_5202051_5207527	Gypsy	reina	+	GAG|reina AP|reina RT|reina RNaseH|reina INT|reina
Chr7_5390504_5402384	Gypsy	del	+	GAG|del AP|del RT|del RNaseH|del INT|del CHR|retroelement
Chr7_5614535_5618964	Copia	mixture	+	AP|ty1/copia INT|retrofit RT|tork RNaseH|retrofit
Chr7_6160757_6172138	Gypsy	tat	+	AP|tat RT|tat RNaseH|tat INT|tat
Chr7_6202984_6216627	Gypsy	tat	+	GAG|tat AP|tat RT|tat RNaseH|tat INT|tat
Chr7_6262095_6275361	Gypsy	tat	+	GAG|tat AP|tat RT|tat RNaseH|tat INT|tat
Chr7_6458452_6466902	Gypsy	tat	+	AP|tat RT|tat RNaseH|tat INT|tat
Chr7_6525270_6535760	Gypsy	del	+	GAG|del AP|del RT|del RNaseH|del INT|del CHR|retroelement
Chr7_6708071_6715415	Copia	sire	+	AP|sire INT|sire RT|sire RNaseH|sire
Chr7_6884138_6889482	Gypsy	reina	+	GAG|reina AP|reina RT|reina RNaseH|reina INT|reina
Chr7_6993423_6998393	Copia	tork	+	AP|tork INT|tork RT|tork RNaseH|tork
Chr7_7010822_7022378	Gypsy	del	+	GAG|del AP|del RT|del RNaseH|del INT|del
Chr7_7076855_7085778	Copia	sire	+	GAG|sire AP|sire INT|sire RT|sire RNaseH|sire
Chr7_7357653_7363857	Copia	tork	+	GAG|tork AP|tork INT|tork RT|tork RNaseH|tork
Chr7_7440923_7450901	Gypsy	tat	+	AP|tat RT|tat RNaseH|tat INT|tat
Chr7_7693416_7702507	Gypsy	del	+	GAG|del AP|del RT|del RNaseH|del INT|del CHR|retroelement
Chr7_7769903_7779544	Copia	mixture	+	GAG|crm AP|ty1/copia INT|retrofit RT|tork RNaseH|retrofit
Chr7_7885725_7899420	Gypsy	tat	+	AP|tat RT|tat RNaseH|tat INT|tat
Chr7_8012290_8023134	Gypsy	tat	+	GAG|tat AP|tat RT|tat RNaseH|tat INT|tat
Chr7_8113448_8124538	Gypsy	del	+	GAG|del AP|del RT|del RNaseH|del INT|del CHR|retroelement
Chr7_8225939_8230604	Copia	tork	+	GAG|tork AP|tork INT|tork RT|tork RNaseH|tork
Chr7_8439502_8454029	Gypsy	tat	+	GAG|tat AP|tat RT|tat RNaseH|tat INT|tat
Chr7_8457779_8464214	Copia	tork	+	GAG|tork AP|tork INT|tork RT|tork RNaseH|tork
Chr7_8761429_8770846	Gypsy	del	+	GAG|del AP|del RT|del RNaseH|del INT|del CHR|retroelement
Chr7_879196_885441	Copia	tork	+	GAG|tork AP|tork INT|tork RT|tork RNaseH|tork
Chr7_8796306_8801860	Copia	tork	+	GAG|tork AP|tork INT|tork RT|tork RNaseH|tork
Chr7_9013333_9018704	Copia	mixture	+	AP|retrofit INT|retrofit RT|tork RNaseH|retrofit
Chr7_9135773_9149133	Gypsy	tat	+	GAG|tat AP|tat RT|tat RNaseH|tat INT|tat
Chr7_9159251_9165142	Copia	tork	+	GAG|tork AP|tork INT|tork RT|tork RNaseH|tork
Chr7_9207714_9212883	Copia	tork	+	GAG|tork AP|tork INT|tork RT|tork RNaseH|tork
Chr7_9317403_9329931	Gypsy	del	+	GAG|del AP|del RT|del RNaseH|del INT|del CHR|retroelement
Chr7_9640099_9647627	Gypsy	del	+	GAG|del AP|del RT|del RNaseH|del INT|del CHR|retroelement
Chr7_9656111_9667379	Gypsy	tat	+	GAG|tat AP|tat RT|tat RNaseH|tat INT|tat
Chr7_9758128_9769023	Gypsy	del	+	GAG|del AP|del RT|del RNaseH|del INT|del CHR|retroelement
Chr7_9770494_9780322	Gypsy	del	+	GAG|del AP|del RT|del RNaseH|del INT|del CHR|retroelement
Chr7_9839225_9853040	Gypsy	del	+	GAG|del AP|del RT|del RNaseH|del INT|del CHR|retroelement
Chr7_9900368_9911969	Gypsy	del	+	GAG|del AP|del RT|del RNaseH|del INT|del CHR|retroelement
Chr7_9940873_9951979	Gypsy	del	+	GAG|del AP|del RT|del RNaseH|del INT|del CHR|retroelement
Chr8_10672582_10677394	Copia	retrofit	+	GAG|retrofit AP|retrofit INT|retrofit RT|retrofit RNaseH|retrofit
Chr8_10702271_10714892	Gypsy	tat	+	GAG|tat AP|tat RT|tat RNaseH|tat INT|tat
Chr8_10830458_10838599	Copia	tork	+	GAG|tork AP|tork INT|tork RT|tork RNaseH|tork
Chr8_10974828_10985941	Gypsy	del	+	GAG|del AP|del RT|del RNaseH|del INT|del CHR|retroelement
Chr8_11025255_11030124	Copia	retrofit	+	GAG|retrofit AP|retrofit INT|retrofit RT|retrofit RNaseH|retrofit
Chr8_11110561_11126208	Gypsy	del	+	GAG|del AP|del RT|del RNaseH|del INT|del CHR|retroelement
Chr8_11293422_11306294	Gypsy	tat	+	GAG|tat AP|tat RT|tat RNaseH|tat INT|tat
Chr8_11513358_11519586	Copia	tork	+	GAG|tork AP|tork INT|tork RT|tork RNaseH|tork
Chr8_11674284_11687904	Copia	sire	+	GAG|sire AP|sire INT|sire RT|sire RNaseH|sire
Chr8_11825974_11839633	Gypsy	del	+	GAG|del AP|del RT|del RNaseH|del INT|del CHR|retroelement
Chr8_11995585_12006433	Gypsy	del	+	GAG|del AP|del RT|del RNaseH|del INT|del CHR|retroelement
Chr8_12051715_12059443	Gypsy	del	+	GAG|del AP|del RT|del RNaseH|del INT|del CHR|retroelement
Chr8_12084226_12096577	Gypsy	del	+	GAG|del AP|del RT|del RNaseH|del INT|del CHR|retroelement
Chr8_12122962_12129188	Copia	tork	+	GAG|tork AP|tork INT|tork RT|tork RNaseH|tork
Chr8_12132253_12139580	Gypsy	crm	+	GAG|crm AP|crm RT|crm RNaseH|crm INT|crm
Chr8_12217646_12228901	Gypsy	del	+	GAG|del AP|del RT|del RNaseH|del INT|del CHR|retroelement
Chr8_12233556_12246185	Gypsy	del	+	GAG|del AP|del RT|del RNaseH|del INT|del CHR|retroelement
Chr8_12465678_12477663	Gypsy	del	+	GAG|del AP|del RT|del RNaseH|del INT|del CHR|retroelement
Chr8_12608471_12620423	Gypsy	del	+	GAG|del AP|del RT|del RNaseH|del INT|del CHR|retroelement
Chr8_12735540_12744820	Gypsy	del	+	GAG|del AP|del RT|del RNaseH|del INT|del CHR|retroelement
Chr8_12955569_12963417	Gypsy	crm	+	GAG|crm AP|crm RT|crm RNaseH|crm INT|crm
Chr8_13080309_13090608	Gypsy	del	+	GAG|del AP|del RT|del RNaseH|del INT|del CHR|retroelement
Chr8_13127424_13136318	Gypsy	tat	+	GAG|tat AP|tat RT|tat RNaseH|tat INT|tat
Chr8_13184554_13192173	Gypsy	crm	+	GAG|crm AP|crm RT|crm RNaseH|crm INT|crm
Chr8_1322952_1334934	Gypsy	del	+	GAG|del AP|del RT|del RNaseH|del INT|del CHR|retroelement
Chr8_13276561_13284179	Gypsy	crm	+	GAG|crm AP|crm RT|crm RNaseH|crm INT|crm
Chr8_13338726_13352146	Gypsy	del	+	GAG|del AP|del RT|del RNaseH|del INT|del CHR|retroelement
Chr8_13460133_13467888	Gypsy	crm	+	GAG|crm AP|crm RT|crm RNaseH|crm INT|crm
Chr8_13489633_13500194	Gypsy	del	+	GAG|del AP|del RT|del RNaseH|del INT|del CHR|retroelement
Chr8_13606346_13617435	Gypsy	tat	+	GAG|tat AP|tat RT|tat RNaseH|tat INT|tat
Chr8_13675924_13688238	Gypsy	tat	+	GAG|tat AP|tat RT|tat RNaseH|tat INT|tat
Chr8_13716522_13728588	Gypsy	del	+	GAG|del AP|del RT|del RNaseH|del INT|del CHR|retroelement
Chr8_13821528_13832036	Gypsy	del	+	GAG|del AP|del RT|del RNaseH|del INT|del CHR|retroelement
Chr8_13869109_13880472	Gypsy	del	+	GAG|del AP|del RT|del RNaseH|del INT|del CHR|retroelement
Chr8_13888565_13900368	Gypsy	del	+	GAG|del AP|del RT|del RNaseH|del INT|del CHR|retroelement
Chr8_14012293_14017600	Gypsy	reina	+	GAG|reina AP|reina RT|reina RNaseH|reina INT|reina
Chr8_14063814_14076646	Gypsy	tat	+	GAG|tat AP|tat RT|tat RNaseH|tat INT|tat
Chr8_14138703_14150362	Gypsy	del	+	GAG|del AP|del RT|del RNaseH|del INT|del CHR|retroelement
Chr8_14214966_14221395	Copia	tork	+	GAG|tork AP|tork INT|tork RT|tork RNaseH|tork
Chr8_14230218_14242275	Gypsy	del	+	GAG|del AP|del RT|del RNaseH|del INT|del CHR|retroelement
Chr8_1428598_1440662	Gypsy	del	+	GAG|del AP|del RT|del RNaseH|del INT|del CHR|retroelement
Chr8_14641427_14652772	Gypsy	tat	+	GAG|tat AP|tat RT|tat RNaseH|tat INT|tat
Chr8_14745773_14751446	Copia	oryco	+	GAG|oryco AP|oryco INT|oryco RT|oryco RNaseH|oryco
Chr8_14793319_14798811	Copia	tork	+	GAG|tork AP|tork INT|tork RT|tork RNaseH|tork
Chr8_14834487_14846552	Gypsy	del	+	GAG|del AP|del RT|del RNaseH|del INT|del CHR|retroelement
Chr8_1488964_1500277	Gypsy	tat	+	GAG|tat AP|tat RT|tat RNaseH|tat INT|tat
Chr8_14891691_14902990	Gypsy	tat	+	GAG|tat AP|tat RT|tat RNaseH|tat INT|tat
Chr8_15241936_15254848	Gypsy	tat	+	GAG|tat AP|tat RT|tat RNaseH|tat INT|tat
Chr8_15321323_15329733	Copia	retrofit	+	GAG|retrofit AP|retrofit INT|retrofit RT|retrofit RNaseH|retrofit
Chr8_15404673_15416321	Gypsy	del	+	GAG|del AP|del RT|del RNaseH|del INT|del CHR|retroelement
Chr8_15776621_15789532	Gypsy	tat	+	GAG|tat AP|tat RT|tat RNaseH|tat INT|tat
Chr8_15799876_15811285	Gypsy	tat	+	GAG|tat AP|tat RT|tat RNaseH|tat INT|tat
Chr8_16113024_16120776	Copia	sire	+	GAG|sire AP|sire INT|sire RT|sire RNaseH|sire
Chr8_16137050_16143421	Copia	oryco	+	GAG|oryco AP|oryco INT|oryco RT|oryco RNaseH|oryco
Chr8_16272967_16280367	Gypsy	tat	+	AP|tat RT|tat RNaseH|tat INT|tat
Chr8_16414560_16426654	Gypsy	del	+	GAG|del AP|del RT|del RNaseH|del INT|del CHR|retroelement
Chr8_16564901_16579695	Gypsy	del	+	GAG|del AP|del RT|del RNaseH|del INT|del CHR|retroelement
Chr8_16649757_16661052	Gypsy	tat	+	GAG|tat AP|tat RT|tat RNaseH|tat INT|tat
Chr8_16926558_16937975	Gypsy	tat	+	GAG|tat AP|tat RT|tat RNaseH|tat INT|tat
Chr8_17421796_17426943	Copia	oryco	+	GAG|oryco AP|oryco INT|oryco RT|oryco RNaseH|oryco
Chr8_17928832_17940908	Gypsy	del	+	GAG|del AP|del RT|del RNaseH|del INT|del CHR|retroelement
Chr8_18109900_18119102	Gypsy	tat	+	AP|tat RT|tat RNaseH|tat INT|tat
Chr8_18122347_18127588	Copia	mixture	+	GAG|retrofit AP|ty1/copia INT|retrofit RT|tork RNaseH|retrofit
Chr8_1816771_1822962	Copia	tork	+	GAG|tork AP|tork INT|tork RT|tork RNaseH|tork
Chr8_18338106_18343392	Copia	sire	+	AP|sire INT|sire RT|sire RNaseH|sire
Chr8_18380594_18391883	Gypsy	tat	+	GAG|tat AP|tat RT|tat RNaseH|tat INT|tat
Chr8_18420835_18427743	Copia	tork	+	GAG|tork AP|tork INT|tork RT|tork RNaseH|tork
Chr8_18429077_18441625	Gypsy	del	+	GAG|del AP|del RT|del RNaseH|del INT|del CHR|retroelement
Chr8_1848088_1853076	Copia	oryco	+	GAG|oryco AP|oryco INT|oryco RT|oryco RNaseH|oryco
Chr8_18555287_18566514	Gypsy	del	+	GAG|del AP|del RT|del RNaseH|del INT|del CHR|retroelement
Chr8_1867098_1878509	Gypsy	tat	+	AP|tat RT|tat RNaseH|tat INT|tat
Chr8_1881703_1897568	Gypsy	tat	+	GAG|tat AP|tat RT|tat RNaseH|tat INT|tat
Chr8_18900966_18910659	Copia	sire	+	GAG|sire AP|sire INT|sire RT|sire RNaseH|sire
Chr8_18921923_18927519	Gypsy	reina	+	GAG|reina AP|reina RT|reina RNaseH|reina INT|reina
Chr8_19129434_19138399	Gypsy	tat	+	GAG|tat AP|tat RT|tat RNaseH|tat INT|tat
Chr8_19144858_19150281	Gypsy	reina	+	GAG|reina AP|reina RT|reina RNaseH|reina INT|reina
Chr8_19248024_19259285	Copia	sire	+	GAG|sire AP|sire INT|sire RT|sire RNaseH|sire
Chr8_1944400_1950605	Copia	tork	+	GAG|tork AP|tork INT|tork RT|tork RNaseH|tork
Chr8_19499315_19513503	Gypsy	del	+	GAG|del AP|del RT|del RNaseH|del INT|del CHR|retroelement
Chr8_19861803_19873283	Gypsy	tat	+	AP|tat RT|tat RNaseH|tat INT|tat
Chr8_20318184_20330618	Gypsy	del	+	GAG|del AP|del RT|del RNaseH|del INT|del CHR|retroelement
Chr8_20510471_20522211	Copia	sire	+	GAG|sire AP|sire INT|sire RT|sire RNaseH|sire
Chr8_20710102_20720092	Gypsy	tat	+	AP|tat RT|tat RNaseH|tat INT|tat
Chr8_20951394_20964375	Gypsy	tat	+	GAG|tat AP|tat RT|tat RNaseH|tat INT|tat
Chr8_21363808_21374959	Gypsy	tat	+	GAG|tat AP|tat RT|tat RNaseH|tat INT|tat
Chr8_21526183_21531278	Copia	mixture	+	AP|ty1/copia INT|retrofit RT|tork RNaseH|sire
Chr8_21614848_21624034	Copia	tork	+	GAG|tork AP|tork INT|tork RT|tork RNaseH|tork
Chr8_2214971_2228356	Gypsy	del	+	GAG|del AP|del RT|del RNaseH|del INT|del CHR|retroelement
Chr8_22166045_22172009	Copia	tork	+	GAG|tork AP|tork INT|tork RT|tork RNaseH|tork
Chr8_22303570_22315853	Gypsy	tat	+	GAG|tat AP|tat RT|tat RNaseH|tat INT|tat
Chr8_22762600_22771319	Gypsy	del	+	GAG|del AP|del RT|del RNaseH|del INT|del CHR|retroelement
Chr8_22864775_22871044	Copia	tork	+	GAG|tork AP|tork INT|tork RT|tork RNaseH|tork
Chr8_22915672_22921745	Copia	tork	+	GAG|tork AP|tork INT|tork RT|tork RNaseH|tork
Chr8_23099970_23110314	Gypsy	del	+	GAG|del AP|del RT|del RNaseH|del INT|del CHR|retroelement
Chr8_2346613_2364668	Gypsy	del	+	GAG|del AP|del RT|del RNaseH|del INT|del CHR|retroelement
Chr8_23766919_23778481	Gypsy	tat	+	GAG|tat AP|tat RT|tat RNaseH|tat INT|tat
Chr8_24415984_24421157	Copia	oryco	+	GAG|oryco AP|oryco INT|oryco RT|oryco RNaseH|oryco
Chr8_24429684_24435589	Copia	tork	+	GAG|tork AP|tork INT|tork RT|tork RNaseH|tork
Chr8_24599829_24612905	Gypsy	del	+	GAG|del AP|del RT|del RNaseH|del INT|del
Chr8_25138556_25147464	Copia	retrofit	+	AP|retrofit INT|retrofit RT|retrofit RNaseH|retrofit
Chr8_2524810_2538871	Gypsy	del	+	GAG|del AP|del RT|del RNaseH|del INT|del CHR|retroelement
Chr8_25287285_25295794	Gypsy	del	+	AP|del RT|del RNaseH|del INT|del
Chr8_2556367_2566646	Copia	tork	+	GAG|tork AP|tork INT|tork RT|tork RNaseH|tork
Chr8_25668347_25674141	Copia	oryco	+	GAG|oryco AP|oryco INT|oryco RT|oryco RNaseH|oryco
Chr8_25943618_25948409	Copia	retrofit	+	GAG|retrofit AP|retrofit INT|retrofit RT|retrofit RNaseH|retrofit
Chr8_2646175_2657485	Gypsy	tat	+	GAG|tat AP|tat RT|tat RNaseH|tat INT|tat
Chr8_26580452_26586676	Copia	tork	+	GAG|tork AP|tork INT|tork RT|tork RNaseH|tork
Chr8_26955028_26967687	Gypsy	tat	+	GAG|tat AP|tat RT|tat RNaseH|tat INT|tat
Chr8_2698834_2710836	Gypsy	del	+	GAG|del AP|del RT|del RNaseH|del INT|del CHR|retroelement
Chr8_27523718_27529945	Copia	tork	+	GAG|tork AP|tork INT|tork RT|tork RNaseH|tork
Chr8_28025153_28038012	Gypsy	tat	+	GAG|tat AP|tat RT|tat RNaseH|tat INT|tat
Chr8_3194295_3206378	Gypsy	tat	+	GAG|tat AP|tat RT|tat RNaseH|tat INT|tat
Chr8_3474119_3487825	Gypsy	del	+	GAG|del AP|del RT|del RNaseH|del INT|del CHR|retroelement
Chr8_3706730_3719792	Gypsy	tat	+	GAG|tat AP|tat RT|tat RNaseH|tat INT|tat
Chr8_3822676_3829068	Copia	tork	+	GAG|tork AP|tork INT|tork RT|tork RNaseH|tork
Chr8_4023185_4033776	Gypsy	tat	+	GAG|tat AP|tat RT|tat RNaseH|tat INT|tat
Chr8_4269006_4276634	Copia	tork	+	GAG|tork AP|tork INT|tork RT|tork RNaseH|tork
Chr8_4792649_4798858	Copia	tork	+	GAG|tork AP|tork INT|tork RT|tork RNaseH|tork
Chr8_4825109_4829724	Copia	tork	+	GAG|tork AP|tork INT|tork RT|tork RNaseH|tork
Chr8_4867856_4880559	Gypsy	tat	+	GAG|tat AP|tat RT|tat RNaseH|tat INT|tat
Chr8_5083125_5094428	Gypsy	tat	+	GAG|tat AP|tat RT|tat RNaseH|tat INT|tat
Chr8_5151372_5157531	Copia	tork	+	GAG|tork AP|tork INT|tork RT|tork RNaseH|tork
Chr8_5291599_5303253	Gypsy	del	+	GAG|del AP|del RT|del RNaseH|del INT|del CHR|retroelement
Chr8_5824396_5835713	Gypsy	tat	+	GAG|tat AP|tat RT|tat RNaseH|tat INT|tat
Chr8_5894304_5905586	Gypsy	tat	+	GAG|tat AP|tat RT|tat RNaseH|tat INT|tat
Chr8_5945272_5950832	Gypsy	reina	+	GAG|reina AP|reina RT|reina RNaseH|reina INT|reina
Chr8_6302731_6311436	Copia	tork	+	GAG|tork AP|tork INT|tork RT|tork RNaseH|tork
Chr8_6328267_6334277	Gypsy	reina	+	GAG|reina AP|reina RT|reina RNaseH|reina INT|reina
Chr8_6341145_6346525	Copia	mixture	+	GAG|retrofit AP|ty1/copia INT|retrofit RT|tork RNaseH|retrofit
Chr8_6573572_6583736	Gypsy	tat	+	GAG|tat AP|tat RT|tat RNaseH|tat INT|tat
Chr8_6696097_6707452	Gypsy	del	+	GAG|del AP|del RT|del RNaseH|del INT|del CHR|retroelement
Chr8_6768202_6779836	Gypsy	del	+	GAG|del AP|del RT|del RNaseH|del INT|del CHR|retroelement
Chr8_7024998_7036183	Gypsy	del	+	GAG|del AP|del RT|del RNaseH|del INT|del CHR|retroelement
Chr8_7186891_7198430	Gypsy	del	+	GAG|del AP|del RT|del RNaseH|del INT|del CHR|retroelement
Chr8_7229237_7241318	Gypsy	del	+	GAG|del AP|del RT|del RNaseH|del INT|del CHR|retroelement
Chr8_7243381_7255287	Gypsy	del	+	GAG|del AP|del RT|del RNaseH|del INT|del CHR|retroelement
Chr8_7282614_7293151	Gypsy	del	+	GAG|del AP|del RT|del RNaseH|del INT|del CHR|retroelement
Chr8_7307135_7318404	Gypsy	tat	+	GAG|tat AP|tat RT|tat RNaseH|tat INT|tat
Chr8_7370569_7382532	Gypsy	del	+	GAG|del AP|del RT|del RNaseH|del INT|del CHR|retroelement
Chr8_7522664_7537157	Gypsy	del	+	GAG|del AP|del RT|del RNaseH|del INT|del CHR|retroelement
Chr8_7674940_7686256	Gypsy	tat	+	AP|tat RT|tat RNaseH|tat INT|tat
Chr8_7769784_7775246	Gypsy	reina	+	GAG|reina AP|reina RT|reina RNaseH|reina INT|reina
Chr8_7824426_7832994	Gypsy	tat	+	GAG|tat AP|tat RT|tat RNaseH|tat INT|tat
Chr8_8048879_8060247	Gypsy	tat	+	GAG|tat AP|tat RT|tat RNaseH|tat INT|tat
Chr8_8091353_8102655	Gypsy	tat	+	GAG|tat AP|tat RT|tat RNaseH|tat INT|tat
Chr8_8194629_8205919	Gypsy	tat	+	GAG|tat AP|tat RT|tat RNaseH|tat INT|tat
Chr8_8367232_8373401	Copia	tork	+	GAG|tork AP|tork INT|tork RT|tork RNaseH|tork
Chr8_8458543_8464209	Copia	tork	+	GAG|tork AP|tork INT|tork RT|tork RNaseH|tork
Chr8_8536877_8548647	Gypsy	del	+	GAG|del AP|del RT|del RNaseH|del INT|del CHR|retroelement
Chr8_8597582_8603996	Copia	tork	+	GAG|tork AP|tork INT|tork RT|tork RNaseH|tork
Chr8_8688565_8701342	Gypsy	tat	+	GAG|tat AP|tat RT|tat RNaseH|tat INT|tat
Chr8_8729798_8739935	Gypsy	del	+	GAG|del AP|del RT|del RNaseH|del INT|del CHR|retroelement
Chr8_9051839_9057555	Copia	oryco	+	GAG|oryco AP|oryco INT|oryco RT|oryco RNaseH|oryco
Chr8_9149857_9161273	Gypsy	tat	+	AP|tat RT|tat RNaseH|tat INT|tat
Chr8_9212950_9218262	Gypsy	mixture	+	GAG|reina AP|reina RT|reina RNaseH|reina INT|reina CHR|retroelement
Chr8_9297489_9307188	Gypsy	tat	+	GAG|tat AP|tat RT|tat RNaseH|tat INT|tat
Chr8_9463516_9474821	Gypsy	tat	+	GAG|tat AP|tat RT|tat RNaseH|tat INT|tat
Chr8_9618891_9625623	Copia	tork	+	GAG|tork AP|tork INT|tork RT|tork RNaseH|tork
Chr8_9859195_9870248	Gypsy	del	+	GAG|del AP|del RT|del RNaseH|del INT|del CHR|retroelement
Chr9_1018064_1026794	Gypsy	del	+	GAG|del AP|del RT|del RNaseH|del INT|del CHR|retroelement
Chr9_10275527_10282615	Copia	tork	+	GAG|tork AP|tork INT|tork RT|tork RNaseH|tork
Chr9_10294695_10303584	Gypsy	tat	+	AP|tat RT|tat RNaseH|tat INT|tat
Chr9_10433494_10446018	Gypsy	del	+	GAG|del AP|del RT|del RNaseH|del INT|del CHR|retroelement
Chr9_10645205_10656045	Gypsy	del	+	GAG|del AP|del RT|del RNaseH|del INT|del CHR|retroelement
Chr9_10662665_10674921	Gypsy	del	+	GAG|del AP|del RT|del RNaseH|del INT|del CHR|retroelement
Chr9_108784_122523	Gypsy	del	+	GAG|del AP|del RT|del RNaseH|del INT|del CHR|retroelement
Chr9_11085557_11100841	Gypsy	mixture	+	GAG|tat AP|tat RT|tat RNaseH|tat INT|tat CHR|retroelement
Chr9_11155079_11170280	Gypsy	crm	+	AP|crm RT|crm RNaseH|crm INT|crm
Chr9_11495295_11504334	Copia	sire	+	GAG|sire AP|sire INT|sire RT|sire RNaseH|sire
Chr9_12132766_12137688	Copia	retrofit	+	GAG|retrofit AP|retrofit INT|retrofit RT|retrofit RNaseH|retrofit
Chr9_1229148_1234789	Copia	oryco	+	GAG|oryco AP|oryco INT|oryco RT|oryco RNaseH|oryco
Chr9_124408_137481	Gypsy	del	+	GAG|del AP|del RT|del RNaseH|del INT|del CHR|retroelement
Chr9_1247747_1253930	Copia	tork	+	GAG|tork AP|tork INT|tork RT|tork RNaseH|tork
Chr9_12676125_12682075	Copia	tork	+	GAG|tork AP|tork INT|tork RT|tork RNaseH|tork
Chr9_12852539_12863901	Gypsy	tat	+	GAG|tat AP|tat RT|tat RNaseH|tat INT|tat
Chr9_13077399_13088705	Gypsy	tat	+	GAG|tat AP|tat RT|tat RNaseH|tat INT|tat
Chr9_13102534_13114114	Gypsy	del	+	GAG|del AP|del RT|del RNaseH|del INT|del CHR|retroelement
Chr9_13239010_13246714	Gypsy	del	+	GAG|del AP|del RT|del RNaseH|del INT|del CHR|retroelement
Chr9_13281016_13294427	Gypsy	del	+	GAG|del AP|del RT|del RNaseH|del INT|del
Chr9_13335127_13345590	Gypsy	tat	+	AP|tat RT|tat RNaseH|tat INT|tat
Chr9_13504539_13515839	Gypsy	tat	+	GAG|tat AP|tat RT|tat RNaseH|tat INT|tat
Chr9_13645680_13651955	Copia	tork	+	GAG|tork AP|tork INT|tork RT|tork RNaseH|tork
Chr9_1380390_1389191	Gypsy	mixture	+	GAG|athila AP|tat RT|tat RNaseH|tat INT|tat
Chr9_13834386_13848800	Gypsy	del	+	GAG|del AP|del RT|del RNaseH|del INT|del CHR|retroelement
Chr9_14260333_14272406	Gypsy	del	+	GAG|del AP|del RT|del RNaseH|del INT|del CHR|retroelement
Chr9_1473375_1487220	Gypsy	tat	+	GAG|tat AP|tat RT|tat RNaseH|tat INT|tat
Chr9_15975000_15980460	Gypsy	reina	+	GAG|reina AP|reina RT|reina RNaseH|reina INT|reina
Chr9_16396715_16401553	Copia	retrofit	+	GAG|retrofit AP|retrofit INT|retrofit RT|retrofit RNaseH|retrofit
Chr9_1685483_1695059	Gypsy	del	+	GAG|del AP|del RT|del RNaseH|del INT|del CHR|retroelement
Chr9_16890235_16904469	Gypsy	tat	+	GAG|tat AP|tat RT|tat RNaseH|tat INT|tat
Chr9_17155454_17168024	Gypsy	del	+	GAG|del AP|del RT|del RNaseH|del INT|del CHR|retroelement
Chr9_17435216_17445530	Copia	sire	+	GAG|sire AP|sire INT|sire RT|sire RNaseH|sire
Chr9_17623405_17633821	Gypsy	tat	+	AP|tat RT|tat RNaseH|tat INT|tat
Chr9_18059435_18064175	Copia	retrofit	+	GAG|retrofit AP|retrofit INT|retrofit RT|retrofit RNaseH|retrofit
Chr9_18114581_18120322	Copia	oryco	+	GAG|oryco AP|oryco INT|oryco RT|oryco RNaseH|oryco
Chr9_18623286_18633307	Gypsy	del	+	GAG|del AP|del RT|del RNaseH|del INT|del CHR|retroelement
Chr9_188413_200410	Gypsy	del	+	GAG|del AP|del RT|del RNaseH|del INT|del CHR|retroelement
Chr9_19370955_19376706	Copia	oryco	+	GAG|oryco AP|oryco INT|oryco RT|oryco RNaseH|oryco
Chr9_1937393_1946640	Gypsy	del	+	GAG|del AP|del RT|del RNaseH|del INT|del CHR|retroelement
Chr9_1953098_1958663	Gypsy	reina	+	GAG|reina AP|reina RT|reina RNaseH|reina INT|reina
Chr9_1967826_1975662	Gypsy	crm	+	GAG|crm AP|crm RT|crm RNaseH|crm INT|crm
Chr9_19933038_19938762	Copia	tork	+	GAG|tork AP|tork INT|tork RT|tork RNaseH|tork
Chr9_20696430_20702860	Copia	tork	+	GAG|tork AP|tork INT|tork RT|tork RNaseH|tork
Chr9_21115863_21125489	Copia	sire	+	GAG|sire AP|sire INT|sire RT|sire RNaseH|sire
Chr9_21987539_22001150	Gypsy	del	+	GAG|del AP|del RT|del RNaseH|del INT|del CHR|retroelement
Chr9_22828342_22840167	Gypsy	tat	+	GAG|tat AP|tat RT|tat RNaseH|tat INT|tat
Chr9_2424899_2430083	Copia	mixture	+	AP|ty1/copia INT|retrofit RT|tork RNaseH|retrofit
Chr9_2567647_2580297	Gypsy	tat	+	GAG|tat AP|tat RT|tat RNaseH|tat INT|tat
Chr9_2662136_2668350	Gypsy	reina	+	GAG|reina AP|reina RT|reina RNaseH|reina INT|reina
Chr9_272112_283405	Gypsy	tat	+	GAG|tat AP|tat RT|tat RNaseH|tat INT|tat
Chr9_2731741_2739508	Gypsy	crm	+	GAG|crm AP|crm RT|crm RNaseH|crm INT|crm
Chr9_2981633_2987910	Copia	tork	+	GAG|tork AP|tork INT|tork RT|tork RNaseH|tork
Chr9_349879_361571	Gypsy	tat	+	GAG|tat AP|tat RT|tat RNaseH|tat INT|tat
Chr9_3678232_3689496	Copia	sire	+	GAG|sire AP|sire INT|sire RT|sire RNaseH|sire
Chr9_379142_390498	Gypsy	tat	+	GAG|tat AP|tat RT|tat RNaseH|tat INT|tat
Chr9_3844121_3849346	Gypsy	reina	+	GAG|reina AP|reina RT|reina RNaseH|reina INT|reina
Chr9_3871452_3882784	Gypsy	tat	+	GAG|tat AP|tat RT|tat RNaseH|tat INT|tat
Chr9_3906889_3913054	Copia	tork	+	GAG|tork AP|tork INT|tork RT|tork RNaseH|tork
Chr9_391534_402566	Gypsy	tat	+	GAG|tat AP|tat RT|tat RNaseH|tat INT|tat
Chr9_4124015_4135039	Copia	sire	+	GAG|sire AP|sire INT|sire RT|sire RNaseH|sire
Chr9_4231446_4246797	Gypsy	mixture	+	GAG|tat AP|del RT|tat RNaseH|del INT|del CHR|retroelement
Chr9_4261309_4272664	Gypsy	tat	+	GAG|tat AP|tat RT|tat RNaseH|tat INT|tat
Chr9_4293406_4299412	Copia	tork	+	GAG|tork AP|tork INT|tork RT|tork RNaseH|tork
Chr9_4310141_4315426	Copia	oryco	+	GAG|oryco AP|oryco INT|oryco RT|oryco RNaseH|oryco
Chr9_4419945_4425595	Gypsy	mixture	+	GAG|reina AP|reina RT|reina RNaseH|reina INT|reina CHR|retroelement
Chr9_4606300_4618753	Gypsy	del	+	GAG|del AP|del RT|del RNaseH|del INT|del CHR|retroelement
Chr9_4679869_4691177	Gypsy	tat	+	GAG|tat AP|tat RT|tat RNaseH|tat INT|tat
Chr9_4713340_4723430	Gypsy	del	+	GAG|del AP|del RT|del RNaseH|del INT|del CHR|retroelement
Chr9_4948724_4959750	Gypsy	tat	+	GAG|tat AP|tat RT|tat RNaseH|tat INT|tat
Chr9_5043060_5058000	Gypsy	del	+	GAG|del AP|del RT|del RNaseH|del INT|del CHR|retroelement
Chr9_5223198_5234523	Gypsy	tat	+	GAG|tat AP|tat RT|tat RNaseH|tat INT|tat
Chr9_5287172_5298987	Gypsy	del	+	GAG|del AP|del RT|del RNaseH|del INT|del CHR|retroelement
Chr9_5354166_5365434	Gypsy	tat	+	GAG|tat AP|tat RT|tat RNaseH|tat INT|tat
Chr9_5462169_5471129	Copia	sire	+	GAG|sire AP|sire INT|sire RT|sire RNaseH|sire
Chr9_5575768_5584689	Gypsy	tat	+	GAG|tat AP|tat RT|tat RNaseH|tat INT|tat
Chr9_5717018_5729085	Gypsy	del	+	GAG|del AP|del RT|del RNaseH|del INT|del CHR|retroelement
Chr9_5997957_6009587	Gypsy	del	+	GAG|del AP|del RT|del RNaseH|del INT|del CHR|retroelement
Chr9_6408236_6424458	Gypsy	tat	+	GAG|tat AP|tat RT|tat RNaseH|tat INT|tat
Chr9_6445339_6450352	Copia	tork	+	GAG|tork AP|tork INT|tork RT|tork RNaseH|tork
Chr9_6720629_6731970	Gypsy	tat	+	GAG|tat AP|tat RT|tat RNaseH|tat INT|tat
Chr9_6782907_6791263	Gypsy	mixture	+	GAG|athila AP|tat RT|tat RNaseH|tat INT|tat
Chr9_701140_711561	Gypsy	del	+	GAG|del AP|del RT|del RNaseH|del INT|del CHR|retroelement
Chr9_733000_738279	Copia	oryco	+	GAG|oryco AP|oryco INT|oryco RT|oryco RNaseH|oryco
Chr9_7416963_7427640	Gypsy	del	+	GAG|del AP|del RT|del RNaseH|del INT|del CHR|retroelement
Chr9_7455231_7466528	Gypsy	del	+	GAG|del AP|del RT|del RNaseH|del INT|del CHR|retroelement
Chr9_757577_767604	Gypsy	tat	+	GAG|tat AP|tat RT|tat RNaseH|tat INT|tat
Chr9_7606839_7617735	Gypsy	del	+	GAG|del AP|del RT|del RNaseH|del INT|del CHR|retroelement
Chr9_7620021_7630256	Gypsy	del	+	GAG|del AP|del RT|del RNaseH|del INT|del CHR|retroelement
Chr9_781510_795220	Gypsy	del	+	GAG|del AP|del RT|del RNaseH|del INT|del CHR|retroelement
Chr9_7847820_7853383	Gypsy	reina	+	GAG|reina AP|reina RT|reina RNaseH|reina INT|reina
Chr9_8052221_8064267	Gypsy	del	+	GAG|del AP|del RT|del RNaseH|del INT|del CHR|retroelement
Chr9_8070247_8075030	Copia	retrofit	+	GAG|retrofit AP|retrofit INT|retrofit RT|retrofit RNaseH|retrofit
Chr9_8081167_8085624	Copia	tork	+	GAG|tork AP|tork INT|tork RT|tork RNaseH|tork
Chr9_8222909_8239100	Gypsy	del	+	GAG|del AP|del RT|del RNaseH|del INT|del
Chr9_82709_94784	Gypsy	del	+	GAG|del AP|del RT|del RNaseH|del INT|del CHR|retroelement
Chr9_8331438_8340332	Gypsy	tat	+	AP|tat RT|tat RNaseH|tat INT|tat
Chr9_8547611_8557576	Copia	sire	+	GAG|sire AP|sire INT|sire RT|sire RNaseH|sire
Chr9_8572145_8577848	Copia	oryco	+	GAG|oryco AP|oryco INT|oryco RT|oryco RNaseH|oryco
Chr9_8719599_8726022	Copia	tork	+	GAG|tork AP|tork INT|tork RT|tork RNaseH|tork
Chr9_8735899_8747382	Gypsy	tat	+	AP|tat RT|tat RNaseH|tat INT|tat
Chr9_8793688_8805164	Gypsy	del	+	GAG|del AP|del RT|del RNaseH|del INT|del CHR|retroelement
Chr9_8857957_8869282	Gypsy	tat	+	GAG|tat AP|tat RT|tat RNaseH|tat INT|tat
Chr9_8942842_8950515	Copia	tork	+	GAG|tork AP|tork INT|tork RT|tork RNaseH|tork
Chr9_9051492_9059802	Copia	sire	+	GAG|sire AP|sire INT|sire RT|sire RNaseH|sire
Chr9_9065625_9070189	Copia	tork	+	GAG|tork AP|tork INT|tork RT|tork RNaseH|tork
Chr9_9124135_9131755	Copia	sire	+	GAG|sire AP|sire INT|sire RT|sire RNaseH|sire
Chr9_9176401_9187786	Gypsy	tat	+	GAG|tat AP|tat RT|tat RNaseH|tat INT|tat
Chr9_9263939_9269457	Gypsy	reina	+	GAG|reina AP|reina RT|reina RNaseH|reina INT|reina
Chr9_9308578_9318197	Gypsy	tat	+	GAG|tat AP|tat RT|tat RNaseH|tat INT|tat
Chr9_9463638_9473911	Gypsy	del	+	GAG|del AP|del RT|del RNaseH|del INT|del CHR|retroelement
Chr9_9826868_9832012	Copia	oryco	+	GAG|oryco AP|oryco INT|oryco RT|oryco RNaseH|oryco
Chr9_9987208_9999738	Gypsy	del	+	GAG|del AP|del RT|del RNaseH|del INT|del CHR|retroelement

## Sheet: S3
Table S3. Specifying LTR domain region
LTR	Domain Start Position	Domain End Position	Strand	Domain
Chr10_10038062_10048419	2916	3728	+	GAG_del
Chr10_10038062_10048419	3894	4151	+	AP_del
Chr10_10038062_10048419	4437	5111	+	RT_del
Chr10_10038062_10048419	5247	5597	+	RNaseH_del
Chr10_10038062_10048419	5901	6935	+	INT_del
Chr10_10038062_10048419	6993	7145	+	CHR_retroelement
Chr10_10133938_10145940	4754	5539	+	GAG_del
Chr10_10133938_10145940	5699	5956	+	AP_del
Chr10_10133938_10145940	6242	6916	+	RT_del
Chr10_10133938_10145940	7052	7402	+	RNaseH_del
Chr10_10133938_10145940	7706	8740	+	INT_del
Chr10_10133938_10145940	8801	8950	+	CHR_retroelement
Chr10_10284407_10292022	2456	3229	+	GAG_crm
Chr10_10284407_10292022	3509	3775	+	AP_crm
Chr10_10284407_10292022	4301	4975	+	RT_crm
Chr10_10284407_10292022	5111	5461	+	RNaseH_crm
Chr10_10284407_10292022	5678	6709	+	INT_crm
Chr10_10363327_10374706	3939	4757	+	GAG_del
Chr10_10363327_10374706	4890	5147	+	AP_del
Chr10_10363327_10374706	5475	6149	+	RT_del
Chr10_10363327_10374706	6285	6635	+	RNaseH_del
Chr10_10363327_10374706	6939	7697	+	INT_del
Chr10_10363327_10374706	8030	8182	+	CHR_retroelement
Chr10_1057194_1059740	914	1558	+	RT_retrofit
Chr10_1057194_1059740	1847	2248	+	RNaseH_retrofit
Chr10_10591590_10604406	679	1377	+	GAG_tat
Chr10_10591590_10604406	1771	2103	+	AP_tat
Chr10_10591590_10604406	5518	6195	+	RT_tat
Chr10_10591590_10604406	6331	6711	+	RNaseH_tat
Chr10_10591590_10604406	7432	8475	+	INT_tat
Chr10_10606492_10613730	2075	2566	+	GAG_crm
Chr10_10606492_10613730	3147	3413	+	AP_crm
Chr10_10606492_10613730	3938	4612	+	RT_crm
Chr10_10606492_10613730	4748	5098	+	RNaseH_crm
Chr10_10606492_10613730	5315	5890	+	INT_crm
Chr10_10687691_10692749	943	1296	+	GAG_tork
Chr10_10687691_10692749	1571	1777	+	AP_tork
Chr10_10687691_10692749	1974	2618	+	INT_tork
Chr10_10687691_10692749	3168	3902	+	RT_tork
Chr10_10687691_10692749	4206	4607	+	RNaseH_tork
Chr10_10942092_10946041	1656	1931	+	GAG_tat
Chr10_10942092_10946041	2569	2901	+	AP_tat
Chr10_10942092_10946041	3347	3559	+	RT_tat
Chr10_11152838_11158777	530	1279	+	GAG_tork
Chr10_11152838_11158777	1397	1645	+	AP_tork
Chr10_11152838_11158777	1793	2425	+	INT_tork
Chr10_11152838_11158777	2918	3646	+	RT_tork
Chr10_11152838_11158777	3929	4342	+	RNaseH_tork
Chr10_11165963_11170470	1460	1657	+	GAG_tat
Chr10_11358440_11370117	1702	2112	+	GAG_tat
Chr10_11358440_11370117	2889	3218	+	AP_tat
Chr10_11358440_11370117	3609	4286	+	RT_tat
Chr10_11358440_11370117	4425	4784	+	RNaseH_tat
Chr10_11358440_11370117	5514	6338	+	INT_tat
Chr10_1143310_1154605	2042	2521	+	GAG_tat
Chr10_1143310_1154605	3212	3538	+	AP_tat
Chr10_1143310_1154605	3764	3931	+	RT_tat
Chr10_1143310_1154605	4523	5566	+	INT_tat
Chr10_11494119_11501432	3621	4112	+	GAG_athila
Chr10_11509408_11521810	1814	2518	+	GAG_tat
Chr10_11509408_11521810	2923	3210	+	AP_tat
Chr10_11509408_11521810	3643	4320	+	RT_tat
Chr10_11509408_11521810	4456	4836	+	RNaseH_tat
Chr10_11676801_11689469	1999	2751	+	GAG_tat
Chr10_11676801_11689469	3173	3496	+	AP_tat
Chr10_11676801_11689469	4024	4380	+	RT_tat
Chr10_11676801_11689469	6494	7039	+	INT_tat
Chr10_11763823_11776669	1893	2390	+	GAG_tat
Chr10_11763823_11776669	3066	3392	+	AP_tat
Chr10_11763823_11776669	3618	3785	+	RT_tat
Chr10_11763823_11776669	4617	4697	+	RNaseH_tat
Chr10_11763823_11776669	6291	7334	+	INT_tat
Chr10_1216016_1222177	791	1477	+	GAG_tork
Chr10_1216016_1222177	1641	1889	+	AP_tork
Chr10_1216016_1222177	2040	2681	+	INT_tork
Chr10_1216016_1222177	3165	3893	+	RT_tork
Chr10_1216016_1222177	4176	4589	+	RNaseH_tork
Chr10_12245282_12254453	2820	3374	+	GAG_del
Chr10_12245282_12254453	3780	4037	+	AP_del
Chr10_12245282_12254453	4323	4991	+	RT_del
Chr10_12245282_12254453	5127	5477	+	RNaseH_del
Chr10_12245282_12254453	5781	6707	+	INT_del
Chr10_12266323_12270893	1584	1778	+	GAG_tat
Chr10_12354674_12363088	1457	1738	+	GAG_tat
Chr10_12354674_12363088	2646	2975	+	AP_tat
Chr10_12354674_12363088	3171	3437	+	INT_tat
Chr10_12381480_12383769	805	1116	+	GAG_reina
Chr10_12438873_12447557	3657	4199	+	GAG_del
Chr10_12455861_12470534	2313	2504	+	RNaseH_tat
Chr10_12455861_12470534	3569	4357	+	INT_tat
Chr10_12485673_12494245	1432	1866	+	GAG_athila
Chr10_12485673_12494245	2947	3228	+	AP_athila
Chr10_1249613_1258213	4128	4691	+	GAG_del
Chr10_12506536_12511869	871	1281	+	GAG_reina
Chr10_12506536_12511869	1707	1838	+	AP_reina
Chr10_12506536_12511869	2322	2996	+	RT_reina
Chr10_12506536_12511869	3132	3482	+	RNaseH_reina
Chr10_12506536_12511869	3711	4736	+	INT_reina
Chr10_12544573_12557199	5162	5710	+	GAG_del
Chr10_12544573_12557199	6084	6341	+	AP_del
Chr10_12544573_12557199	6669	7343	+	RT_del
Chr10_12544573_12557199	7479	7829	+	RNaseH_del
Chr10_12544573_12557199	8133	9167	+	INT_del
Chr10_12544573_12557199	9225	9377	+	CHR_retroelement
Chr10_12589502_12599660	2931	3716	+	GAG_del
Chr10_12589502_12599660	3876	4133	+	AP_del
Chr10_12589502_12599660	4419	5093	+	RT_del
Chr10_12589502_12599660	5229	5579	+	RNaseH_del
Chr10_12589502_12599660	5883	6917	+	INT_del
Chr10_12589502_12599660	6978	7127	+	CHR_retroelement
Chr10_12614666_12626168	4088	4903	+	GAG_del
Chr10_12614666_12626168	5069	5326	+	AP_del
Chr10_12614666_12626168	5612	6286	+	RT_del
Chr10_12614666_12626168	6422	6772	+	RNaseH_del
Chr10_12614666_12626168	7076	8110	+	INT_del
Chr10_12614666_12626168	8168	8320	+	CHR_retroelement
Chr10_12631593_12642972	3832	4650	+	GAG_del
Chr10_12631593_12642972	4783	5040	+	AP_del
Chr10_12631593_12642972	5368	6042	+	RT_del
Chr10_12631593_12642972	6178	6528	+	RNaseH_del
Chr10_12631593_12642972	7143	7874	+	INT_del
Chr10_12631593_12642972	7932	8084	+	CHR_retroelement
Chr10_12645886_12655978	3213	3617	+	RNaseH_oryco
Chr10_12715792_12726068	2920	3708	+	GAG_del
Chr10_12715792_12726068	3841	4098	+	AP_del
Chr10_12715792_12726068	4426	5100	+	RT_del
Chr10_12715792_12726068	5236	5586	+	RNaseH_del
Chr10_12715792_12726068	5890	6924	+	INT_del
Chr10_12715792_12726068	6985	7134	+	CHR_retroelement
Chr10_12827947_12831744	1704	2174	+	GAG_crm
Chr10_12856714_12862886	1777	2220	+	GAG_crm
Chr10_12902630_12914031	3123	3455	+	AP_tat
Chr10_12902630_12914031	3858	4535	+	RT_tat
Chr10_12902630_12914031	4671	5033	+	RNaseH_tat
Chr10_12902630_12914031	6059	6844	+	INT_tat
Chr10_13174340_13179852	895	1413	+	GAG_oryco
Chr10_13174340_13179852	1897	2145	+	AP_oryco
Chr10_13174340_13179852	2292	2945	+	INT_oryco
Chr10_13174340_13179852	3662	4372	+	RT_oryco
Chr10_13174340_13179852	4664	5062	+	RNaseH_oryco
Chr10_13198720_13209738	3583	4398	+	GAG_del
Chr10_13198720_13209738	4564	4821	+	AP_del
Chr10_13198720_13209738	5107	5685	+	RT_del
Chr10_13198720_13209738	5918	6268	+	RNaseH_del
Chr10_13198720_13209738	6572	7606	+	INT_del
Chr10_13198720_13209738	7664	7816	+	CHR_retroelement
Chr10_13315554_13324019	2695	3513	+	GAG_del
Chr10_13315554_13324019	3646	3903	+	AP_del
Chr10_13315554_13324019	4231	4905	+	RT_del
Chr10_13315554_13324019	5041	5391	+	RNaseH_del
Chr10_13315554_13324019	5695	6729	+	INT_del
Chr10_13315554_13324019	6787	6939	+	CHR_retroelement
Chr10_13407883_13422845	1771	2157	+	GAG_tat
Chr10_13407883_13422845	2959	3288	+	AP_tat
Chr10_13407883_13422845	3679	4353	+	RT_tat
Chr10_13407883_13422845	4496	4855	+	RNaseH_tat
Chr10_13407883_13422845	5562	6179	+	INT_tat
Chr10_13462200_13464275	637	1407	+	GAG_oryco
Chr10_13472432_13478523	577	930	+	GAG_oryco
Chr10_13472432_13478523	2403	2651	+	AP_oryco
Chr10_13472432_13478523	2802	3455	+	INT_oryco
Chr10_13472432_13478523	4113	4838	+	RT_oryco
Chr10_13472432_13478523	5127	5531	+	RNaseH_oryco
Chr10_1368799_1379703	3678	4463	+	GAG_del
Chr10_1368799_1379703	4623	4880	+	AP_del
Chr10_1368799_1379703	5166	5840	+	RT_del
Chr10_1368799_1379703	5976	6326	+	RNaseH_del
Chr10_1368799_1379703	6630	7664	+	INT_del
Chr10_1368799_1379703	7728	7874	+	CHR_retroelement
Chr10_1395449_1404106	1010	1753	+	GAG_tork
Chr10_1395449_1404106	1871	2116	+	AP_tork
Chr10_1395449_1404106	2267	2908	+	INT_tork
Chr10_1395449_1404106	3392	3985	+	RT_tork
Chr10_1395449_1404106	7456	7869	+	RNaseH_tork
Chr10_14158290_14169567	1810	2517	+	GAG_tat
Chr10_14158290_14169567	2878	3210	+	AP_tat
Chr10_14158290_14169567	3643	4320	+	RT_tat
Chr10_14158290_14169567	4456	4836	+	RNaseH_tat
Chr10_14158290_14169567	5563	6606	+	INT_tat
Chr10_14196037_14202016	4121	5071	-	GAG_sire
Chr10_14240899_14252644	1571	1987	+	GAG_tat
Chr10_14240899_14252644	2759	3088	+	AP_tat
Chr10_14240899_14252644	3479	4156	+	RT_tat
Chr10_14240899_14252644	4295	4654	+	RNaseH_tat
Chr10_14240899_14252644	5384	6412	+	INT_tat
Chr10_14806674_14819182	1737	2489	+	GAG_tat
Chr10_14806674_14819182	2910	3236	+	AP_tat
Chr10_14806674_14819182	3462	3629	+	RT_tat
Chr10_14806674_14819182	5942	6985	+	INT_tat
Chr10_14989916_15000877	3620	4216	+	GAG_del
Chr10_14989916_15000877	4649	4906	+	AP_del
Chr10_14989916_15000877	5201	5875	+	RT_del
Chr10_14989916_15000877	6011	6361	+	RNaseH_del
Chr10_14989916_15000877	6665	7699	+	INT_del
Chr10_14989916_15000877	7760	7906	+	CHR_retroelement
Chr10_15036852_15045136	5145	5495	+	RNaseH_del
Chr10_15088356_15098166	4558	4977	+	GAG_del
Chr10_15088356_15098166	4960	5214	+	RNaseH_del
Chr10_15088356_15098166	5519	6553	+	INT_del
Chr10_15088356_15098166	6614	6763	+	CHR_retroelement
Chr10_15282168_15287387	614	1399	+	GAG_oryco
Chr10_15282168_15287387	1622	1867	+	AP_oryco
Chr10_15282168_15287387	2018	2671	+	INT_oryco
Chr10_15282168_15287387	3296	4003	+	RT_oryco
Chr10_15282168_15287387	4307	4711	+	RNaseH_oryco
Chr10_15415374_15419577	814	1104	+	AP_ty1/copia
Chr10_15415374_15419577	1234	1878	+	INT_retrofit
Chr10_15415374_15419577	2581	3294	+	RT_tork
Chr10_15415374_15419577	3589	3990	+	RNaseH_retrofit
Chr10_15551326_15557268	796	1530	+	GAG_tork
Chr10_15551326_15557268	1669	1917	+	AP_tork
Chr10_15551326_15557268	2068	2709	+	INT_tork
Chr10_15551326_15557268	3193	3918	+	RT_tork
Chr10_15551326_15557268	4201	4614	+	RNaseH_tork
Chr10_15711566_15724449	1878	2630	+	GAG_tat
Chr10_15711566_15724449	3051	3377	+	AP_tat
Chr10_15711566_15724449	3603	3770	+	RT_tat
Chr10_15711566_15724449	6276	7319	+	INT_tat
Chr10_15863741_15868536	467	1087	+	GAG_retrofit
Chr10_15863741_15868536	1175	1420	+	AP_retrofit
Chr10_15863741_15868536	1582	2220	+	INT_retrofit
Chr10_15863741_15868536	4134	4538	+	RNaseH_retrofit
Chr10_15953028_15965796	1757	2509	+	GAG_tat
Chr10_15953028_15965796	2930	3256	+	AP_tat
Chr10_15953028_15965796	3668	4282	+	RT_tat
Chr10_15953028_15965796	6154	7197	+	INT_tat
Chr10_16170538_16173262	1101	1820	+	GAG_tork
Chr10_16170538_16173262	1983	2222	+	AP_ty1/copia
Chr10_16170538_16173262	2345	2608	+	INT_tork
Chr10_16187004_16195908	497	1231	+	GAG_tork
Chr10_16187004_16195908	1370	1618	+	AP_tork
Chr10_16187004_16195908	1769	2410	+	INT_tork
Chr10_16187004_16195908	2894	3619	+	RT_tork
Chr10_16187004_16195908	7062	7475	+	RNaseH_tork
Chr10_16353263_16362471	1077	1382	+	GAG_tork
Chr10_16353263_16362471	2011	2256	+	AP_tork
Chr10_16353263_16362471	2404	2799	+	INT_tork
Chr10_16353263_16362471	3665	4132	+	RT_tork
Chr10_16353263_16362471	5938	6351	+	RNaseH_tork
Chr10_16371699_16377314	285	1028	+	GAG_tork
Chr10_16371699_16377314	1146	1394	+	AP_tork
Chr10_16371699_16377314	1545	2186	+	INT_tork
Chr10_16371699_16377314	2670	3389	+	RT_tork
Chr10_16371699_16377314	3673	4086	+	RNaseH_tork
Chr10_16744138_16749883	2014	2490	+	GAG_tat
Chr10_16744138_16749883	2690	2992	+	INT_tat
Chr10_16744138_16749883	3933	4331	+	RNaseH_tat
Chr10_16872142_16883663	1266	2192	+	GAG_sire
Chr10_16872142_16883663	3283	3525	+	AP_sire
Chr10_16872142_16883663	3679	4314	+	INT_sire
Chr10_16872142_16883663	4932	5657	+	RT_sire
Chr10_16872142_16883663	5943	6344	+	RNaseH_sire
Chr10_16872142_16883663	8306	8830	+	ENV_sire
Chr10_16887040_16890658	774	1400	-	GAG_oryco
Chr10_17275502_17286822	1819	2526	+	GAG_tat
Chr10_17275502_17286822	2885	3217	+	AP_tat
Chr10_17275502_17286822	3650	4327	+	RT_tat
Chr10_17275502_17286822	4463	4843	+	RNaseH_tat
Chr10_17275502_17286822	5571	6614	+	INT_tat
Chr10_17700638_17706257	1005	1745	+	GAG_tork
Chr10_17700638_17706257	1863	2111	+	AP_tork
Chr10_17700638_17706257	2262	2903	+	INT_tork
Chr10_17700638_17706257	3500	4114	+	RT_tork
Chr10_17700638_17706257	4397	4756	+	RNaseH_tork
Chr10_18093861_18098078	2587	2754	-	GAG_tat
Chr10_1813680_1817212	1119	1316	+	GAG_tat
Chr10_18208408_18213515	776	1468	+	GAG_tork
Chr10_18208408_18213515	1637	1885	+	AP_tork
Chr10_18208408_18213515	2042	2686	+	INT_tork
Chr10_18208408_18213515	3236	3970	+	RT_tork
Chr10_18208408_18213515	4284	4685	+	RNaseH_tork
Chr10_18289873_18294301	923	1168	+	AP_ty1/copia
Chr10_18289873_18294301	1337	1972	+	INT_retrofit
Chr10_18289873_18294301	2820	3533	+	RT_tork
Chr10_18289873_18294301	3828	4232	+	RNaseH_retrofit
Chr10_18456076_18470266	3099	3431	+	AP_tat
Chr10_18456076_18470266	3833	4510	+	RT_tat
Chr10_18456076_18470266	4646	5008	+	RNaseH_tat
Chr10_18456076_18470266	5777	6820	+	INT_tat
Chr10_18476617_18482493	1146	1658	+	GAG_oryco
Chr10_18476617_18482493	2148	2396	+	AP_oryco
Chr10_18476617_18482493	2544	3194	+	INT_oryco
Chr10_18476617_18482493	3915	4631	+	RT_oryco
Chr10_18476617_18482493	4926	5330	+	RNaseH_oryco
Chr10_1879581_1884783	627	1412	+	GAG_oryco
Chr10_1879581_1884783	1629	1877	+	AP_oryco
Chr10_1879581_1884783	2025	2678	+	INT_oryco
Chr10_1879581_1884783	3264	3989	+	RT_oryco
Chr10_1879581_1884783	4281	4685	+	RNaseH_oryco
Chr10_18921504_18932533	1921	2577	+	RT_tat
Chr10_18921504_18932533	4387	5430	+	INT_tat
Chr10_19312769_19317573	1638	1901	+	RT_tat
Chr10_19312769_19317573	2566	2964	+	RNaseH_tat
Chr10_19486382_19500881	374	601	+	GAG_tat
Chr10_19486382_19500881	5402	5728	+	AP_tat
Chr10_19486382_19500881	5954	6121	+	RT_tat
Chr10_19486382_19500881	8872	9717	+	INT_tat
Chr10_19504520_19510917	1023	1766	+	GAG_tork
Chr10_19504520_19510917	1884	2132	+	AP_tork
Chr10_19504520_19510917	2283	2924	+	INT_tork
Chr10_19504520_19510917	3408	4136	+	RT_tork
Chr10_19504520_19510917	4419	4832	+	RNaseH_tork
Chr10_19568998_19583523	5787	6299	+	GAG_crm
Chr10_19655030_19661257	826	1560	+	GAG_tork
Chr10_19655030_19661257	1699	1947	+	AP_tork
Chr10_19655030_19661257	2098	2739	+	INT_tork
Chr10_19655030_19661257	3223	3948	+	RT_tork
Chr10_19655030_19661257	4231	4644	+	RNaseH_tork
Chr10_1966811_1977725	1823	2530	+	GAG_tat
Chr10_1966811_1977725	2891	3223	+	AP_tat
Chr10_1966811_1977725	3656	4333	+	RT_tat
Chr10_1966811_1977725	4469	4849	+	RNaseH_tat
Chr10_1966811_1977725	5575	6618	+	INT_tat
Chr10_1979175_1985501	1517	1993	+	GAG_athila
Chr10_19794923_19800611	1082	1549	+	GAG_reina
Chr10_19794923_19800611	1985	2239	+	AP_reina
Chr10_19794923_19800611	2612	3286	+	RT_reina
Chr10_19794923_19800611	3422	3772	+	RNaseH_reina
Chr10_19794923_19800611	4007	5032	+	INT_reina
Chr10_20049757_20055560	617	1360	+	GAG_tork
Chr10_20049757_20055560	1478	1726	+	AP_tork
Chr10_20049757_20055560	1877	2518	+	INT_tork
Chr10_20049757_20055560	3002	3730	+	RT_tork
Chr10_20049757_20055560	4013	4426	+	RNaseH_tork
Chr10_20125998_20134373	757	1251	+	GAG_reina
Chr10_20125998_20134373	1615	1863	+	AP_reina
Chr10_20125998_20134373	2248	2922	+	RT_reina
Chr10_20125998_20134373	6208	6558	+	RNaseH_reina
Chr10_20125998_20134373	6790	7818	+	INT_reina
Chr10_20515135_20524792	2608	3357	+	GAG_del
Chr10_20515135_20524792	3523	3780	+	AP_del
Chr10_20515135_20524792	4066	4740	+	RT_del
Chr10_20515135_20524792	4876	5226	+	RNaseH_del
Chr10_20515135_20524792	5670	6560	+	INT_del
Chr10_20515135_20524792	6618	6770	+	CHR_retroelement
Chr10_2074256_2087946	7125	7298	+	RNaseH_tork
Chr10_20953911_20970462	3165	4211	+	AP_pepsins_A1b
Chr10_209824_221091	1811	2518	+	GAG_tat
Chr10_209824_221091	2878	3180	+	AP_tat
Chr10_209824_221091	3599	4276	+	RT_tat
Chr10_209824_221091	4412	4792	+	RNaseH_tat
Chr10_209824_221091	5659	6561	+	INT_tat
Chr10_21004493_21009285	13	708	+	AP_pepsins_A1b
Chr10_21493394_21504696	1804	2511	+	GAG_tat
Chr10_21493394_21504696	2869	3201	+	AP_tat
Chr10_21493394_21504696	3634	4311	+	RT_tat
Chr10_21493394_21504696	4447	4827	+	RNaseH_tat
Chr10_21493394_21504696	5554	6597	+	INT_tat
Chr10_21506416_21517836	2076	2786	+	GAG_tat
Chr10_21506416_21517836	3144	3476	+	AP_tat
Chr10_21506416_21517836	3879	4556	+	RT_tat
Chr10_21506416_21517836	4688	5050	+	RNaseH_tat
Chr10_21506416_21517836	5794	6837	+	INT_tat
Chr10_21644463_21649721	749	1219	+	GAG_reina
Chr10_21644463_21649721	1652	1906	+	AP_reina
Chr10_21644463_21649721	2279	2953	+	RT_reina
Chr10_21644463_21649721	3091	3438	+	RNaseH_reina
Chr10_21644463_21649721	3676	4701	+	INT_reina
Chr10_21917177_21921894	275	1126	+	GAG_retrofit
Chr10_21917177_21921894	1214	1459	+	AP_retrofit
Chr10_21917177_21921894	1846	2184	+	INT_retrofit
Chr10_21917177_21921894	2866	3054	+	RT_retrofit
Chr10_21917177_21921894	4039	4443	+	RNaseH_retrofit
Chr10_21971873_21977800	1324	1752	+	GAG_reina
Chr10_21971873_21977800	2170	2394	+	AP_reina
Chr10_21971873_21977800	2809	3480	+	RT_reina
Chr10_21971873_21977800	3613	3963	+	RNaseH_reina
Chr10_21971873_21977800	4208	5239	+	INT_reina
Chr10_21971873_21977800	5297	5440	+	CHR_retroelement
Chr10_2215131_2219900	276	1061	+	GAG_retrofit
Chr10_2215131_2219900	1155	1406	+	AP_retrofit
Chr10_2215131_2219900	1739	2200	+	INT_retrofit
Chr10_2215131_2219900	2978	3811	+	RT_retrofit
Chr10_2215131_2219900	4103	4507	+	RNaseH_retrofit
Chr10_22300481_22306181	1056	1865	+	GAG_oryco
Chr10_22300481_22306181	2058	2306	+	AP_oryco
Chr10_22300481_22306181	2454	3107	+	INT_oryco
Chr10_22300481_22306181	3828	4547	+	RT_oryco
Chr10_22300481_22306181	4842	5246	+	RNaseH_oryco
Chr10_22402726_22408474	1081	1596	+	GAG_oryco
Chr10_22402726_22408474	2080	2328	+	AP_oryco
Chr10_22402726_22408474	2476	3129	+	INT_oryco
Chr10_22402726_22408474	3850	4566	+	RT_oryco
Chr10_22402726_22408474	4861	5265	+	RNaseH_oryco
Chr10_22612952_22624207	3469	4293	+	GAG_del
Chr10_22612952_22624207	4426	4683	+	AP_del
Chr10_22612952_22624207	5011	5685	+	RT_del
Chr10_22612952_22624207	5821	6171	+	RNaseH_del
Chr10_22612952_22624207	6475	7509	+	INT_del
Chr10_22612952_22624207	7570	7719	+	CHR_retroelement
Chr10_22712944_22720771	1780	2175	+	MOV_badnavirus
Chr10_22802208_22811178	2458	3054	+	GAG_del
Chr10_22802208_22811178	3487	3744	+	AP_del
Chr10_22802208_22811178	4039	4713	+	RT_del
Chr10_22802208_22811178	4849	5199	+	RNaseH_del
Chr10_22802208_22811178	5503	6537	+	INT_del
Chr10_22802208_22811178	6598	6744	+	CHR_retroelement
Chr10_22948395_22955885	4051	4506	+	INT_copia
Chr10_22948395_22955885	5783	6145	+	RT_sire
Chr10_22948395_22955885	6458	6655	+	RNaseH_tork
Chr10_23162260_23168251	2044	2574	+	GAG_tork
Chr10_23162260_23168251	2768	2944	+	AP_tork
Chr10_23162260_23168251	3823	4023	+	RT_tork
Chr10_23162260_23168251	5050	5259	+	RNaseH_tork
Chr10_23168987_23183304	1789	2409	+	GAG_tat
Chr10_23168987_23183304	2951	3628	+	RT_tat
Chr10_23168987_23183304	3764	4144	+	RNaseH_tat
Chr10_23168987_23183304	4871	5461	+	INT_tat
Chr10_2641464_2656042	1723	2742	+	GAG_sire
Chr10_2641464_2656042	3815	4057	+	AP_sire
Chr10_2641464_2656042	4211	4867	+	INT_sire
Chr10_2641464_2656042	5489	6211	+	RT_sire
Chr10_2641464_2656042	6497	6898	+	RNaseH_sire
Chr10_264715_273111	411	1112	+	GAG_tork
Chr10_264715_273111	4912	5163	+	AP_tork
Chr10_264715_273111	5320	5964	+	INT_tork
Chr10_264715_273111	6478	7209	+	RT_tork
Chr10_264715_273111	7513	7914	+	RNaseH_tork
Chr10_2872935_2883028	6280	6900	+	INT_copia
Chr10_2872935_2883028	7941	8615	+	RT_tork
Chr10_2872935_2883028	8931	9350	+	RNaseH_1731
Chr10_3066738_3077559	8480	8707	+	GAG_tat
Chr10_3134608_3138770	3365	3724	-	RNaseH_tat
Chr10_3192379_3201911	2201	2767	+	GAG_del
Chr10_3192379_3201911	3176	3433	+	AP_del
Chr10_3192379_3201911	3719	4393	+	RT_del
Chr10_3192379_3201911	4529	4879	+	RNaseH_del
Chr10_3192379_3201911	5184	5828	+	INT_del
Chr10_3192379_3201911	6281	6430	+	CHR_retroelement
Chr10_3206782_3213254	4041	4565	+	GAG_del
Chr10_3223633_3235440	4373	5005	+	GAG_del
Chr10_3223633_3235440	5354	5611	+	AP_del
Chr10_3223633_3235440	5897	6571	+	RT_del
Chr10_3223633_3235440	6707	7057	+	RNaseH_del
Chr10_3223633_3235440	7361	8395	+	INT_del
Chr10_3223633_3235440	8453	8605	+	CHR_retroelement
Chr10_3244802_3256091	4768	5553	+	GAG_del
Chr10_3244802_3256091	5713	5970	+	AP_del
Chr10_3244802_3256091	6293	6931	+	RT_del
Chr10_3244802_3256091	7067	7417	+	RNaseH_del
Chr10_3244802_3256091	7721	8755	+	INT_del
Chr10_3244802_3256091	8816	8965	+	CHR_retroelement
Chr10_3300168_3310667	5619	6377	+	GAG_del
Chr10_3300168_3310667	6606	6863	+	AP_del
Chr10_3300168_3310667	7161	7835	+	RT_del
Chr10_3300168_3310667	7971	8321	+	RNaseH_del
Chr10_3300168_3310667	8625	9659	+	INT_del
Chr10_3300168_3310667	9723	9866	+	CHR_retroelement
Chr10_3312255_3326346	6675	7490	+	GAG_del
Chr10_3312255_3326346	7656	7913	+	AP_del
Chr10_3312255_3326346	8199	8873	+	RT_del
Chr10_3312255_3326346	9009	9359	+	RNaseH_del
Chr10_3312255_3326346	9663	10697	+	INT_del
Chr10_3312255_3326346	10755	10907	+	CHR_retroelement
Chr10_3361767_3372991	3997	4782	+	GAG_del
Chr10_3361767_3372991	4942	5199	+	AP_del
Chr10_3361767_3372991	5485	6159	+	RT_del
Chr10_3361767_3372991	6295	6645	+	RNaseH_del
Chr10_3361767_3372991	6949	7983	+	INT_del
Chr10_3361767_3372991	8044	8193	+	CHR_retroelement
Chr10_3554458_3569136	8985	9779	+	GAG_del
Chr10_3554458_3569136	10014	10271	+	AP_del
Chr10_3554458_3569136	10566	11240	+	RT_del
Chr10_3554458_3569136	11376	11726	+	RNaseH_del
Chr10_3554458_3569136	12030	13064	+	INT_del
Chr10_3554458_3569136	13125	13271	+	CHR_retroelement
Chr10_3737017_3749761	1214	1531	+	GAG_athila
Chr10_388632_400625	2005	2556	+	GAG_sire
Chr10_388632_400625	3668	3910	+	AP_sire
Chr10_388632_400625	4064	4720	+	INT_sire
Chr10_388632_400625	5315	6040	+	RT_sire
Chr10_388632_400625	6326	6727	+	RNaseH_sire
Chr10_388632_400625	8722	9249	+	ENV_sire
Chr10_4098525_4109406	2310	2537	+	GAG_reina
Chr10_4098525_4109406	3825	4160	+	RT_reina
Chr10_4098525_4109406	8669	9016	+	RNaseH_reina
Chr10_4098525_4109406	9251	9856	+	INT_reina
Chr10_4132229_4146455	1806	2513	+	GAG_tat
Chr10_4132229_4146455	2874	3164	+	AP_tat
Chr10_4132229_4146455	3797	4249	+	RT_tat
Chr10_4132229_4146455	4385	4765	+	RNaseH_tat
Chr10_4132229_4146455	5492	6265	+	INT_tat
Chr10_4175646_4189872	1806	2513	+	GAG_tat
Chr10_4175646_4189872	2874	3164	+	AP_tat
Chr10_4175646_4189872	3797	4249	+	RT_tat
Chr10_4175646_4189872	4385	4765	+	RNaseH_tat
Chr10_4175646_4189872	5492	6265	+	INT_tat
Chr10_4229726_4239219	2153	2380	+	GAG_tat
Chr10_4229726_4239219	3171	3503	+	AP_tat
Chr10_4229726_4239219	5072	5536	+	RT_tat
Chr10_4229726_4239219	5671	5949	+	RNaseH_tat
Chr10_4229726_4239219	6801	7283	+	INT_tat
Chr10_4387269_4391266	94	699	+	RT_del
Chr10_4387269_4391266	835	1185	+	RNaseH_del
Chr10_4387269_4391266	1489	2523	+	INT_del
Chr10_4387269_4391266	2584	2733	+	CHR_retroelement
Chr10_4420444_4431359	3678	4463	+	GAG_del
Chr10_4420444_4431359	4623	4880	+	AP_del
Chr10_4420444_4431359	5175	5840	+	RT_del
Chr10_4420444_4431359	5976	6326	+	RNaseH_del
Chr10_4420444_4431359	6630	7664	+	INT_del
Chr10_4420444_4431359	7725	7874	+	CHR_retroelement
Chr10_4483105_4488520	1883	2362	+	GAG_tat
Chr10_4483105_4488520	2559	2861	+	INT_tat
Chr10_4483105_4488520	3732	4130	+	RNaseH_tat
Chr10_4549833_4558788	3877	4686	+	GAG_del
Chr10_4549833_4558788	4819	5076	+	AP_del
Chr10_4549833_4558788	5408	6073	+	RT_del
Chr10_4549833_4558788	6211	6561	+	RNaseH_del
Chr10_4549833_4558788	6844	7878	+	INT_del
Chr10_4549833_4558788	7940	8089	+	CHR_retroelement
Chr10_4715390_4725364	2776	3561	+	GAG_del
Chr10_4715390_4725364	3708	3965	+	AP_del
Chr10_4715390_4725364	4251	4925	+	RT_del
Chr10_4715390_4725364	5061	5411	+	RNaseH_del
Chr10_4715390_4725364	5715	6428	+	INT_del
Chr10_4715390_4725364	6794	6895	+	CHR_retroelement
Chr10_4738116_4743731	1609	2118	+	GAG_tork
Chr10_4738116_4743731	2333	2587	+	AP_tork
Chr10_4738116_4743731	3482	3775	+	RT_tork
Chr10_4738116_4743731	4519	4719	+	RNaseH_tork
Chr10_4764331_4775566	4236	5054	+	GAG_del
Chr10_4764331_4775566	5187	5444	+	AP_del
Chr10_4764331_4775566	5772	6446	+	RT_del
Chr10_4764331_4775566	6582	6932	+	RNaseH_del
Chr10_4764331_4775566	7236	8270	+	INT_del
Chr10_4764331_4775566	8328	8480	+	CHR_retroelement
Chr10_4899055_4910735	4582	5382	+	GAG_del
Chr10_4899055_4910735	5542	5799	+	AP_del
Chr10_4899055_4910735	6085	6759	+	RT_del
Chr10_4899055_4910735	6895	7245	+	RNaseH_del
Chr10_4899055_4910735	7549	8496	+	INT_del
Chr10_4899055_4910735	8684	8836	+	CHR_retroelement
Chr10_4976731_4988255	4092	4493	+	GAG_del
Chr10_4976731_4988255	5065	5322	+	AP_del
Chr10_4976731_4988255	5608	6282	+	RT_del
Chr10_4976731_4988255	6418	6768	+	RNaseH_del
Chr10_4976731_4988255	7072	8106	+	INT_del
Chr10_4976731_4988255	8164	8316	+	CHR_retroelement
Chr10_4999453_5013140	11638	12198	+	GAG_crm
Chr10_5014055_5017564	2311	2805	+	GAG_crm
Chr10_5023049_5037432	2468	2848	+	GAG_del
Chr10_5023049_5037432	3266	3523	+	AP_del
Chr10_5023049_5037432	3809	4324	+	RT_del
Chr10_5023049_5037432	4617	4967	+	RNaseH_del
Chr10_5023049_5037432	6697	7380	+	INT_del
Chr10_5023049_5037432	7790	7939	+	CHR_retroelement
Chr10_5045719_5054028	1092	2315	+	GAG_sire
Chr10_5045719_5054028	3555	3794	+	AP_sire
Chr10_5045719_5054028	3948	4604	+	INT_sire
Chr10_5045719_5054028	5280	5990	+	RT_sire
Chr10_5045719_5054028	6290	6691	+	RNaseH_sire
Chr10_5065763_5078141	4792	5601	+	GAG_del
Chr10_5065763_5078141	5767	6024	+	AP_del
Chr10_5065763_5078141	6310	6984	+	RT_del
Chr10_5065763_5078141	7120	7470	+	RNaseH_del
Chr10_5065763_5078141	7774	8808	+	INT_del
Chr10_5065763_5078141	8866	9018	+	CHR_retroelement
Chr10_5123428_5135164	4623	5423	+	GAG_del
Chr10_5123428_5135164	5583	5840	+	AP_del
Chr10_5123428_5135164	6126	6800	+	RT_del
Chr10_5123428_5135164	6936	7286	+	RNaseH_del
Chr10_5123428_5135164	7590	8624	+	INT_del
Chr10_5123428_5135164	8682	8831	+	CHR_retroelement
Chr10_5296072_5309298	6117	6938	+	GAG_del
Chr10_5296072_5309298	7071	7328	+	AP_del
Chr10_5296072_5309298	7641	8117	+	RT_del
Chr10_5296072_5309298	8265	8603	+	RNaseH_del
Chr10_5296072_5309298	8905	9693	+	INT_del
Chr10_5383901_5389446	987	1343	+	GAG_tork
Chr10_5383901_5389446	1459	1707	+	AP_tork
Chr10_5383901_5389446	1855	2496	+	INT_tork
Chr10_5383901_5389446	3260	3709	+	RT_tork
Chr10_5383901_5389446	4010	4372	+	RNaseH_tork
Chr10_5397084_5405089	3845	4372	+	GAG_del
Chr10_5528913_5532771	692	880	+	GAG_tat
Chr10_555918_560353	2342	2845	+	GAG_crm
Chr10_5612498_5624331	1881	2198	+	GAG_tat
Chr10_5612498_5624331	2781	3338	+	RT_tat
Chr10_5612498_5624331	3534	3620	+	RNaseH_tat
Chr10_5612498_5624331	4958	6001	+	INT_tat
Chr10_561339_574603	1800	1979	+	AP_tat
Chr10_561339_574603	2367	3044	+	RT_tat
Chr10_561339_574603	3183	3362	+	RNaseH_tat
Chr10_5703781_5710706	2017	2826	+	GAG_tork
Chr10_5703781_5710706	2923	3177	+	AP_tork
Chr10_5703781_5710706	3355	4026	+	INT_tork
Chr10_5703781_5710706	4657	5262	+	RT_tork
Chr10_5703781_5710706	5694	6104	+	RNaseH_tork
Chr10_5742484_5754997	5097	5915	+	GAG_del
Chr10_5742484_5754997	6048	6305	+	AP_del
Chr10_5742484_5754997	6633	7307	+	RT_del
Chr10_5742484_5754997	7443	7793	+	RNaseH_del
Chr10_5742484_5754997	8097	9131	+	INT_del
Chr10_5742484_5754997	9189	9341	+	CHR_retroelement
Chr10_576662_581402	331	1146	+	GAG_retrofit
Chr10_576662_581402	1228	1473	+	AP_retrofit
Chr10_576662_581402	1665	2264	+	INT_retrofit
Chr10_576662_581402	4135	4539	+	RNaseH_retrofit
Chr10_5799495_5803613	643	1701	+	GAG_sire
Chr10_5799495_5803613	3089	3328	+	AP_sire
Chr10_5848219_5860212	4752	5537	+	GAG_del
Chr10_5848219_5860212	5697	5954	+	AP_del
Chr10_5848219_5860212	6240	6914	+	RT_del
Chr10_5848219_5860212	7050	7400	+	RNaseH_del
Chr10_5848219_5860212	7704	8738	+	INT_del
Chr10_5848219_5860212	8799	8948	+	CHR_retroelement
Chr10_5875705_5881611	1406	1636	+	GAG_athila
Chr10_5990483_6001778	1795	2499	+	GAG_tat
Chr10_5990483_6001778	2857	3189	+	AP_tat
Chr10_5990483_6001778	3622	4299	+	RT_tat
Chr10_5990483_6001778	4435	4815	+	RNaseH_tat
Chr10_5990483_6001778	5542	6585	+	INT_tat
Chr10_6038_16986	5139	5654	+	GAG_del
Chr10_6039574_6050259	2313	2588	+	GAG_del
Chr10_6039574_6050259	3268	3525	+	AP_del
Chr10_6039574_6050259	3853	4527	+	RT_del
Chr10_6039574_6050259	4663	5013	+	RNaseH_del
Chr10_6039574_6050259	5317	6351	+	INT_del
Chr10_6039574_6050259	6412	6561	+	CHR_retroelement
Chr10_6116796_6129386	558	1580	+	GAG_sire
Chr10_6116796_6129386	6400	6606	+	AP_sire
Chr10_6116796_6129386	7001	7396	+	INT_sire
Chr10_6116796_6129386	8086	8268	+	RT_sire
Chr10_6116796_6129386	9076	9417	+	RNaseH_sire
Chr10_6254716_6263178	269	1081	+	GAG_retrofit
Chr10_6254716_6263178	1163	1411	+	AP_retrofit
Chr10_6254716_6263178	1565	1735	+	INT_retrofit
Chr10_6254716_6263178	3647	4084	+	RT_retrofit
Chr10_6254716_6263178	7959	8192	+	RNaseH_retrofit
Chr10_6323071_6335136	4634	5446	+	GAG_del
Chr10_6323071_6335136	5612	5869	+	AP_del
Chr10_6323071_6335136	6155	6829	+	RT_del
Chr10_6323071_6335136	6965	7315	+	RNaseH_del
Chr10_6323071_6335136	7619	8653	+	INT_del
Chr10_6323071_6335136	8711	8863	+	CHR_retroelement
Chr10_6435886_6447955	4647	5456	+	GAG_del
Chr10_6435886_6447955	5622	5879	+	AP_del
Chr10_6435886_6447955	6165	6839	+	RT_del
Chr10_6435886_6447955	6975	7325	+	RNaseH_del
Chr10_6435886_6447955	7629	8663	+	INT_del
Chr10_6435886_6447955	8721	8873	+	CHR_retroelement
Chr10_6465769_6475995	3656	4441	+	GAG_del
Chr10_6465769_6475995	4601	4858	+	AP_del
Chr10_6465769_6475995	5144	5818	+	RT_del
Chr10_6465769_6475995	5954	6304	+	RNaseH_del
Chr10_6465769_6475995	6608	7642	+	INT_del
Chr10_6465769_6475995	7703	7852	+	CHR_retroelement
Chr10_6490321_6495088	904	1392	+	GAG_athila
Chr10_6490321_6495088	2430	2711	+	AP_athila
Chr10_6524362_6529616	3316	3573	+	AP_crm
Chr10_6606723_6621041	4955	5530	+	GAG_tat
Chr10_6606723_6621041	5891	6223	+	AP_tat
Chr10_6606723_6621041	6656	7333	+	RT_tat
Chr10_6606723_6621041	7469	7849	+	RNaseH_tat
Chr10_6606723_6621041	8635	9498	+	INT_tat
Chr10_6675527_6687635	1848	2339	+	GAG_tat
Chr10_6675527_6687635	3021	3347	+	AP_tat
Chr10_6675527_6687635	3573	3740	+	RT_tat
Chr10_6675527_6687635	6246	7289	+	INT_tat
Chr10_6762012_6774009	4757	5542	+	GAG_del
Chr10_6762012_6774009	5702	5959	+	AP_del
Chr10_6762012_6774009	6277	6918	+	RT_del
Chr10_6762012_6774009	7054	7404	+	RNaseH_del
Chr10_6762012_6774009	7708	8742	+	INT_del
Chr10_6762012_6774009	8803	8952	+	CHR_retroelement
Chr10_6801608_6812928	1785	2492	+	GAG_tat
Chr10_6801608_6812928	2850	3182	+	AP_tat
Chr10_6801608_6812928	3615	4073	+	RT_tat
Chr10_6801608_6812928	4427	4807	+	RNaseH_tat
Chr10_6801608_6812928	5534	6577	+	INT_tat
Chr10_6930389_6935900	4676	5089	-	INT_tat
Chr10_6961468_6974461	4760	5545	+	GAG_del
Chr10_6961468_6974461	5705	5962	+	AP_del
Chr10_6961468_6974461	6248	6922	+	RT_del
Chr10_6961468_6974461	7058	7408	+	RNaseH_del
Chr10_6961468_6974461	11140	11781	+	INT_del
Chr10_6961468_6974461	11842	11991	+	CHR_retroelement
Chr10_697196_706272	1267	2469	+	GAG_sire
Chr10_697196_706272	3721	3960	+	AP_sire
Chr10_697196_706272	4114	4770	+	INT_sire
Chr10_697196_706272	5440	6165	+	RT_sire
Chr10_697196_706272	6451	6852	+	RNaseH_sire
Chr10_7069666_7081745	4639	5274	+	GAG_del
Chr10_7069666_7081745	5620	5877	+	AP_del
Chr10_7069666_7081745	6163	6837	+	RT_del
Chr10_7069666_7081745	6973	7323	+	RNaseH_del
Chr10_7069666_7081745	7627	8661	+	INT_del
Chr10_7069666_7081745	8719	8871	+	CHR_retroelement
Chr10_7126749_7138832	4650	5465	+	GAG_del
Chr10_7126749_7138832	5631	5888	+	AP_del
Chr10_7126749_7138832	6174	6848	+	RT_del
Chr10_7126749_7138832	6984	7334	+	RNaseH_del
Chr10_7126749_7138832	7638	8672	+	INT_del
Chr10_7126749_7138832	8730	8882	+	CHR_retroelement
Chr10_7228446_7239746	1805	2512	+	GAG_tat
Chr10_7228446_7239746	2870	3202	+	AP_tat
Chr10_7228446_7239746	3635	4312	+	RT_tat
Chr10_7228446_7239746	4448	4828	+	RNaseH_tat
Chr10_7228446_7239746	5555	6598	+	INT_tat
Chr10_7316913_7327038	2904	3689	+	GAG_del
Chr10_7316913_7327038	3849	4106	+	AP_del
Chr10_7316913_7327038	4392	5066	+	RT_del
Chr10_7316913_7327038	5202	5552	+	RNaseH_del
Chr10_7316913_7327038	5856	6890	+	INT_del
Chr10_7316913_7327038	6954	7100	+	CHR_retroelement
Chr10_731932_743111	1848	2558	+	GAG_tat
Chr10_731932_743111	2916	3248	+	AP_tat
Chr10_731932_743111	3651	4328	+	RT_tat
Chr10_731932_743111	4464	4826	+	RNaseH_tat
Chr10_731932_743111	5579	6622	+	INT_tat
Chr10_7376387_7384033	2837	3166	+	AP_tat
Chr10_7376387_7384033	3557	4234	+	RT_tat
Chr10_7376387_7384033	4373	4732	+	RNaseH_tat
Chr10_7376387_7384033	5462	6490	+	INT_tat
Chr10_7427533_7433815	657	1133	+	GAG_retrofit
Chr10_7427533_7433815	1319	1471	+	AP_retrofit
Chr10_7427533_7433815	1622	2260	+	INT_retrofit
Chr10_7427533_7433815	4741	5340	+	RT_retrofit
Chr10_7427533_7433815	5635	6036	+	RNaseH_retrofit
Chr10_7464574_7474771	5060	5338	+	GAG_athila
Chr10_7464574_7474771	8724	9059	+	INT_tat
Chr10_7568912_7573561	2334	2594	+	AP_crm
Chr10_7600467_7611763	1794	2498	+	GAG_tat
Chr10_7600467_7611763	2856	3188	+	AP_tat
Chr10_7600467_7611763	3621	4298	+	RT_tat
Chr10_7600467_7611763	4434	4814	+	RNaseH_tat
Chr10_7600467_7611763	5541	6584	+	INT_tat
Chr10_7832797_7844729	1793	2221	+	GAG_tat
Chr10_7832797_7844729	2686	2916	+	AP_tat
Chr10_7832797_7844729	5048	5725	+	RT_tat
Chr10_7832797_7844729	5861	6241	+	RNaseH_tat
Chr10_7832797_7844729	6968	7792	+	INT_tat
Chr10_7873834_7888809	4287	5087	+	GAG_del
Chr10_7873834_7888809	5408	5512	+	AP_del
Chr10_7873834_7888809	10047	10721	+	RT_del
Chr10_7873834_7888809	10857	11207	+	RNaseH_del
Chr10_7873834_7888809	11511	12545	+	INT_del
Chr10_7873834_7888809	12632	12754	+	CHR_retroelement
Chr10_7890773_7898189	1325	1555	+	GAG_tat
Chr10_7890773_7898189	3560	3856	+	AP_tat
Chr10_7890773_7898189	4512	5153	+	RT_tat
Chr10_7890773_7898189	5297	5521	+	RNaseH_athila
Chr10_7890773_7898189	5610	6668	+	INT_tat
Chr10_7928406_7936379	2417	2605	+	AP_del
Chr10_7928406_7936379	2903	3577	+	RT_del
Chr10_7928406_7936379	3713	4063	+	RNaseH_del
Chr10_7928406_7936379	4367	5401	+	INT_del
Chr10_7928406_7936379	5465	5608	+	CHR_retroelement
Chr10_8054514_8057024	487	690	+	RNaseH_crm
Chr10_8054514_8057024	907	1938	+	INT_crm
Chr10_8213645_8225732	4654	5283	+	GAG_del
Chr10_8213645_8225732	5635	5892	+	AP_del
Chr10_8213645_8225732	6178	6852	+	RT_del
Chr10_8213645_8225732	6988	7338	+	RNaseH_del
Chr10_8213645_8225732	7642	8676	+	INT_del
Chr10_8213645_8225732	8734	8886	+	CHR_retroelement
Chr10_8251876_8259643	2638	3396	+	GAG_crm
Chr10_8251876_8259643	3664	3930	+	AP_crm
Chr10_8251876_8259643	4405	5079	+	RT_crm
Chr10_8251876_8259643	5215	5565	+	RNaseH_crm
Chr10_8251876_8259643	5782	6813	+	INT_crm
Chr10_8271588_8282570	3560	4375	+	GAG_del
Chr10_8271588_8282570	4541	4798	+	AP_del
Chr10_8271588_8282570	5084	5758	+	RT_del
Chr10_8271588_8282570	5894	6244	+	RNaseH_del
Chr10_8271588_8282570	6548	7582	+	INT_del
Chr10_8271588_8282570	7640	7792	+	CHR_retroelement
Chr10_8310957_8318297	5700	5945	-	INT_tat
Chr10_8328359_8339097	5081	5899	+	GAG_del
Chr10_8328359_8339097	6032	6289	+	AP_del
Chr10_8328359_8339097	6617	7291	+	RT_del
Chr10_8328359_8339097	7427	7777	+	RNaseH_del
Chr10_8328359_8339097	8081	9115	+	INT_del
Chr10_8328359_8339097	9173	9325	+	CHR_retroelement
Chr10_8389936_8402767	2019	2495	+	GAG_tat
Chr10_8389936_8402767	3192	3518	+	AP_tat
Chr10_8389936_8402767	3930	4607	+	RT_tat
Chr10_8389936_8402767	5100	5417	+	RNaseH_tat
Chr10_8389936_8402767	6225	7268	+	INT_tat
Chr10_8411501_8416768	799	1221	+	GAG_reina
Chr10_8411501_8416768	1618	1869	+	AP_del
Chr10_8411501_8416768	2224	2898	+	RT_reina
Chr10_8411501_8416768	3031	3381	+	RNaseH_reina
Chr10_8411501_8416768	3622	4635	+	INT_reina
Chr10_8411501_8416768	4690	4824	+	CHR_retroelement
Chr10_8448715_8460791	4646	5461	+	GAG_del
Chr10_8448715_8460791	5627	5884	+	AP_del
Chr10_8448715_8460791	6170	6844	+	RT_del
Chr10_8448715_8460791	6980	7330	+	RNaseH_del
Chr10_8448715_8460791	7634	8668	+	INT_del
Chr10_8448715_8460791	8726	8878	+	CHR_retroelement
Chr10_8537364_8548707	3918	4733	+	GAG_del
Chr10_8537364_8548707	4866	5123	+	AP_del
Chr10_8537364_8548707	5451	6125	+	RT_del
Chr10_8537364_8548707	6261	6611	+	RNaseH_del
Chr10_8537364_8548707	6915	7949	+	INT_del
Chr10_8537364_8548707	8007	8159	+	CHR_retroelement
Chr10_8621340_8628427	2406	3191	+	GAG_del
Chr10_8621340_8628427	3351	3608	+	AP_del
Chr10_8621340_8628427	3894	4568	+	RT_del
Chr10_8621340_8628427	4704	5054	+	RNaseH_del
Chr10_8621340_8628427	5358	6392	+	INT_del
Chr10_8621340_8628427	6453	6602	+	CHR_retroelement
Chr10_8664080_8678572	1796	2503	+	GAG_tat
Chr10_8664080_8678572	2861	3193	+	AP_tat
Chr10_8664080_8678572	3626	4303	+	RT_tat
Chr10_8664080_8678572	4439	4819	+	RNaseH_tat
Chr10_8664080_8678572	5546	6589	+	INT_tat
Chr10_8742827_8754151	4638	5453	+	GAG_del
Chr10_8742827_8754151	5619	5876	+	AP_del
Chr10_8742827_8754151	6162	6836	+	RT_del
Chr10_8742827_8754151	6972	7322	+	RNaseH_del
Chr10_8742827_8754151	7626	8660	+	INT_del
Chr10_8742827_8754151	8718	8870	+	CHR_retroelement
Chr10_8782530_8784332	518	1153	+	GAG_oryco
Chr10_8818517_8825064	2072	2866	+	GAG_del
Chr10_8818517_8825064	3028	3435	+	RT_del
Chr10_8818517_8825064	3571	3921	+	RNaseH_del
Chr10_8818517_8825064	4225	5259	+	INT_del
Chr10_8818517_8825064	5320	5469	+	CHR_retroelement
Chr10_8851445_8863996	5091	5909	+	GAG_del
Chr10_8851445_8863996	6042	6299	+	AP_del
Chr10_8851445_8863996	6627	7301	+	RT_del
Chr10_8851445_8863996	7437	7787	+	RNaseH_del
Chr10_8851445_8863996	8091	9125	+	INT_del
Chr10_8851445_8863996	9183	9335	+	CHR_retroelement
Chr10_8879001_8883182	2114	2434	+	GAG_crm
Chr10_8894809_8906530	2103	2432	+	GAG_tat
Chr10_8894809_8906530	3243	3572	+	AP_tat
Chr10_8894809_8906530	4091	4480	+	RT_tat
Chr10_8894809_8906530	4779	5138	+	RNaseH_tat
Chr10_8894809_8906530	5901	6872	+	INT_tat
Chr10_9010421_9022329	5122	5940	+	GAG_del
Chr10_9010421_9022329	6073	6330	+	AP_del
Chr10_9010421_9022329	6658	7332	+	RT_del
Chr10_9010421_9022329	7468	7818	+	RNaseH_del
Chr10_9010421_9022329	8122	9156	+	INT_del
Chr10_9010421_9022329	9214	9366	+	CHR_retroelement
Chr10_9043119_9053040	3933	4718	+	GAG_del
Chr10_9043119_9053040	4878	5135	+	AP_del
Chr10_9043119_9053040	5421	6095	+	RT_del
Chr10_9043119_9053040	6231	6581	+	RNaseH_del
Chr10_9043119_9053040	6885	7727	+	INT_del
Chr10_9127007_9135631	3773	4069	+	AP_tat
Chr10_9127007_9135631	4680	4967	+	RT_tat
Chr10_9127007_9135631	5508	5873	+	RNaseH_tat
Chr10_9127007_9135631	6795	7811	+	INT_tat
Chr10_9239460_9251082	4203	5027	+	GAG_del
Chr10_9239460_9251082	5160	5417	+	AP_del
Chr10_9239460_9251082	5745	6419	+	RT_del
Chr10_9239460_9251082	6555	6905	+	RNaseH_del
Chr10_9239460_9251082	7209	8243	+	INT_del
Chr10_9239460_9251082	8304	8453	+	CHR_retroelement
Chr10_9291455_9302941	3029	3415	+	GAG_del
Chr10_9291455_9302941	3973	4230	+	AP_del
Chr10_9291455_9302941	4513	5172	+	RT_del
Chr10_9291455_9302941	5251	5601	+	RNaseH_del
Chr10_9291455_9302941	5905	6939	+	INT_del
Chr10_9291455_9302941	7000	7149	+	CHR_retroelement
Chr10_9317659_9328562	1719	2096	+	GAG_tat
Chr10_9317659_9328562	2907	3041	+	AP_tat
Chr10_9317659_9328562	3251	3610	+	RNaseH_tat
Chr10_9317659_9328562	4340	5368	+	INT_tat
Chr10_9477558_9490474	3211	3423	+	MOV_badnavirus
Chr10_9477558_9490474	6612	7382	+	RT_caulimovirus
Chr10_9477558_9490474	7485	7865	+	RNaseH_badnavirus
Chr10_9543330_9551000	4138	4557	+	INT_copia
Chr10_9543330_9551000	5596	6273	+	RT_tork
Chr10_9543330_9551000	6586	6789	+	RNaseH_tork
Chr10_957861_970863	2386	2559	+	GAG_tat
Chr10_957861_970863	3902	4195	+	AP_tat
Chr10_957861_970863	4734	5417	+	RT_tat
Chr10_957861_970863	5562	5924	+	RNaseH_tat
Chr10_957861_970863	6576	7634	+	INT_tat
Chr10_9610100_9615311	787	1149	+	GAG_retrofit
Chr10_9610100_9615311	1735	1977	+	AP_retrofit
Chr10_9610100_9615311	2128	2586	+	INT_retrofit
Chr10_9610100_9615311	3594	4319	+	RT_retrofit
Chr10_9610100_9615311	4608	5009	+	RNaseH_retrofit
Chr10_9654425_9662066	3170	3733	+	GAG_del
Chr10_9713591_9719652	2102	2632	+	GAG_tork
Chr10_9713591_9719652	2826	3002	+	AP_tork
Chr10_9713591_9719652	3879	4289	+	RT_tork
Chr10_9713591_9719652	4922	5122	+	RNaseH_tork
Chr10_9732092_9743364	1795	2502	+	GAG_tat
Chr10_9732092_9743364	2860	3192	+	AP_tat
Chr10_9732092_9743364	3625	4302	+	RT_tat
Chr10_9732092_9743364	4438	4818	+	RNaseH_tat
Chr10_9732092_9743364	5545	6588	+	INT_tat
Chr10_9820273_9826520	846	1589	+	GAG_tork
Chr10_9820273_9826520	1707	1955	+	AP_tork
Chr10_9820273_9826520	2106	2744	+	INT_tork
Chr10_9820273_9826520	3237	3839	+	RT_tork
Chr10_9820273_9826520	4244	4657	+	RNaseH_tork
Chr10_9869969_9875524	350	1093	+	GAG_tork
Chr10_9869969_9875524	1211	1459	+	AP_tork
Chr10_9869969_9875524	1824	2252	+	INT_tork
Chr10_9869969_9875524	3008	3466	+	RT_tork
Chr10_9869969_9875524	3749	4162	+	RNaseH_tork
Chr11_1008507_1013881	355	882	+	ENV_sire
Chr11_10136267_10139514	283	507	+	INT_tork
Chr11_10136267_10139514	991	1716	+	RT_tork
Chr11_10136267_10139514	1999	2412	+	RNaseH_tork
Chr11_10164378_10169107	2431	2691	+	AP_crm
Chr11_10209101_10215561	1047	1781	+	GAG_tork
Chr11_10209101_10215561	1920	2168	+	AP_tork
Chr11_10209101_10215561	2319	2960	+	INT_tork
Chr11_10209101_10215561	3444	4169	+	RT_tork
Chr11_10209101_10215561	4452	4865	+	RNaseH_tork
Chr11_10480531_10491427	7197	7640	+	GAG_tork
Chr11_10480531_10491427	8163	8804	+	INT_tork
Chr11_10480531_10491427	9175	9810	+	RT_tork
Chr11_10480531_10491427	10117	10515	+	RNaseH_tork
Chr11_1054588_1060832	833	1567	+	GAG_tork
Chr11_1054588_1060832	1706	1954	+	AP_tork
Chr11_1054588_1060832	2105	2746	+	INT_tork
Chr11_1054588_1060832	3230	3955	+	RT_tork
Chr11_1054588_1060832	4238	4651	+	RNaseH_tork
Chr11_10670870_10682973	2549	2773	+	GAG_tat
Chr11_10670870_10682973	4287	4415	+	AP_tat
Chr11_10670870_10682973	4957	5640	+	RT_tat
Chr11_10670870_10682973	5785	6147	+	RNaseH_tat
Chr11_10670870_10682973	6849	7856	+	INT_tat
Chr11_1098504_1111440	1891	2367	+	GAG_tat
Chr11_1098504_1111440	3064	3390	+	AP_tat
Chr11_1098504_1111440	3616	3783	+	RT_tat
Chr11_1098504_1111440	6289	7332	+	INT_tat
Chr11_10991670_10998105	1040	1768	+	GAG_tork
Chr11_10991670_10998105	1907	2155	+	AP_tork
Chr11_10991670_10998105	2306	2845	+	INT_tork
Chr11_10991670_10998105	3731	4153	+	RT_tork
Chr11_10991670_10998105	4436	4849	+	RNaseH_tork
Chr11_11117652_11128919	9999	10259	+	AP_crm
Chr11_11170698_11182376	4456	5241	+	GAG_del
Chr11_11170698_11182376	5401	5658	+	AP_del
Chr11_11170698_11182376	5944	6618	+	RT_del
Chr11_11170698_11182376	6754	7104	+	RNaseH_del
Chr11_11170698_11182376	7408	8442	+	INT_del
Chr11_11170698_11182376	8503	8652	+	CHR_retroelement
Chr11_11242233_11253686	1759	2139	+	GAG_tat
Chr11_11242233_11253686	2945	3274	+	AP_tat
Chr11_11242233_11253686	3664	4341	+	RT_tat
Chr11_11242233_11253686	4480	4839	+	RNaseH_tat
Chr11_11242233_11253686	5569	6597	+	INT_tat
Chr11_11273810_11280171	1713	2012	+	AP_tat
Chr11_11273810_11280171	2548	3231	+	RT_tat
Chr11_11273810_11280171	3444	3737	+	RNaseH_tat
Chr11_11273810_11280171	4372	5430	+	INT_tat
Chr11_11293777_11307674	1640	2215	+	GAG_sire
Chr11_11293777_11307674	6998	7240	+	AP_sire
Chr11_11293777_11307674	7394	8023	+	INT_sire
Chr11_11293777_11307674	8761	9168	+	RT_sire
Chr11_11293777_11307674	9768	10169	+	RNaseH_sire
Chr11_11312551_11325130	2490	2717	+	GAG_tat
Chr11_11312551_11325130	4036	4329	+	AP_tat
Chr11_11312551_11325130	4870	5544	+	RT_tat
Chr11_11312551_11325130	5695	6051	+	RNaseH_tat
Chr11_11312551_11325130	6703	7761	+	INT_tat
Chr11_11417550_11428904	1785	2492	+	GAG_tat
Chr11_11417550_11428904	2853	3185	+	AP_tat
Chr11_11417550_11428904	3618	4295	+	RT_tat
Chr11_11417550_11428904	4431	4799	+	RNaseH_tat
Chr11_11459536_11470990	3445	4203	+	GAG_del
Chr11_11459536_11470990	4432	4689	+	AP_del
Chr11_11459536_11470990	4987	5661	+	RT_del
Chr11_11459536_11470990	5825	6148	+	RNaseH_del
Chr11_11459536_11470990	6452	7486	+	INT_del
Chr11_11459536_11470990	7547	7693	+	CHR_retroelement
Chr11_11551694_11562618	7717	7866	+	AP_crm
Chr11_11614606_11630940	3144	3371	+	GAG_tat
Chr11_11614606_11630940	7609	7887	+	AP_tat
Chr11_11614606_11630940	8443	9126	+	RT_tat
Chr11_11614606_11630940	9271	9633	+	RNaseH_tat
Chr11_11614606_11630940	10344	10973	+	INT_tat
Chr11_11635883_11647050	3838	4662	+	GAG_del
Chr11_11635883_11647050	4795	5052	+	AP_del
Chr11_11635883_11647050	5380	5736	+	RT_del
Chr11_11635883_11647050	6170	6508	+	RNaseH_del
Chr11_11635883_11647050	6812	7846	+	INT_del
Chr11_11635883_11647050	7907	8056	+	CHR_retroelement
Chr11_11673225_11683205	2742	3557	+	GAG_del
Chr11_11673225_11683205	3690	3947	+	AP_del
Chr11_11673225_11683205	4275	4949	+	RT_del
Chr11_11673225_11683205	5085	5435	+	RNaseH_del
Chr11_11673225_11683205	5978	6661	+	INT_del
Chr11_11673225_11683205	6719	6871	+	CHR_retroelement
Chr11_11707426_11712606	943	1245	+	GAG_reina
Chr11_11707426_11712606	1621	1878	+	AP_reina
Chr11_11707426_11712606	2167	2841	+	RT_reina
Chr11_11707426_11712606	2974	3324	+	RNaseH_reina
Chr11_11707426_11712606	3565	4578	+	INT_reina
Chr11_11707426_11712606	4636	4767	+	CHR_retroelement
Chr11_11721701_11734169	1886	2365	+	GAG_tat
Chr11_11721701_11734169	3059	3385	+	AP_tat
Chr11_11721701_11734169	3611	3778	+	RT_tat
Chr11_11721701_11734169	6284	7327	+	INT_tat
Chr11_11808147_11821552	2092	2802	+	GAG_tat
Chr11_11808147_11821552	5060	5392	+	AP_tat
Chr11_11808147_11821552	5796	6473	+	RT_tat
Chr11_11808147_11821552	6609	6971	+	RNaseH_tat
Chr11_11808147_11821552	8074	8781	+	INT_tat
Chr11_1182880_1199180	8199	8957	+	GAG_del
Chr11_1182880_1199180	9186	9443	+	AP_del
Chr11_1182880_1199180	9741	10415	+	RT_del
Chr11_1182880_1199180	10551	10862	+	RNaseH_del
Chr11_1182880_1199180	11423	12457	+	INT_del
Chr11_1182880_1199180	12521	12664	+	CHR_retroelement
Chr11_11832201_11844279	4637	5245	+	GAG_del
Chr11_11832201_11844279	5618	5875	+	AP_del
Chr11_11832201_11844279	6161	6835	+	RT_del
Chr11_11832201_11844279	6971	7321	+	RNaseH_del
Chr11_11832201_11844279	7625	8659	+	INT_del
Chr11_11832201_11844279	8717	8869	+	CHR_retroelement
Chr11_11943732_11954719	3796	4608	+	GAG_del
Chr11_11943732_11954719	4741	4998	+	AP_del
Chr11_11943732_11954719	5358	5999	+	RT_del
Chr11_11943732_11954719	6135	6485	+	RNaseH_del
Chr11_11943732_11954719	7272	7829	+	INT_del
Chr11_11943732_11954719	7887	8039	+	CHR_retroelement
Chr11_11997604_12001579	2321	2833	+	GAG_crm
Chr11_12068946_12073352	2314	2796	+	GAG_crm
Chr11_12193883_12198060	2112	2630	+	GAG_crm
Chr11_12211641_12221655	2992	3426	+	GAG_del
Chr11_12211641_12221655	3942	4199	+	AP_del
Chr11_12211641_12221655	4485	5159	+	RT_del
Chr11_12211641_12221655	5295	5645	+	RNaseH_del
Chr11_12211641_12221655	5949	6959	+	INT_del
Chr11_12211641_12221655	7041	7193	+	CHR_retroelement
Chr11_12249476_12260219	3533	4291	+	GAG_del
Chr11_12249476_12260219	4705	4776	+	AP_del
Chr11_12249476_12260219	5076	5441	+	RT_del
Chr11_12249476_12260219	5625	5975	+	RNaseH_del
Chr11_12249476_12260219	6279	6932	+	INT_del
Chr11_12249476_12260219	7346	7492	+	CHR_retroelement
Chr11_12346135_12350841	2656	3144	+	GAG_crm
Chr11_12495105_12505119	2992	3426	+	GAG_del
Chr11_12495105_12505119	3942	4199	+	AP_del
Chr11_12495105_12505119	4485	5159	+	RT_del
Chr11_12495105_12505119	5295	5645	+	RNaseH_del
Chr11_12495105_12505119	5949	6959	+	INT_del
Chr11_12495105_12505119	7041	7193	+	CHR_retroelement
Chr11_12532984_12543727	3533	4291	+	GAG_del
Chr11_12532984_12543727	4705	4776	+	AP_del
Chr11_12532984_12543727	5076	5441	+	RT_del
Chr11_12532984_12543727	5625	5975	+	RNaseH_del
Chr11_12532984_12543727	6279	6932	+	INT_del
Chr11_12532984_12543727	7346	7492	+	CHR_retroelement
Chr11_12571824_12574642	1158	1583	+	GAG_crm
Chr11_12571824_12574642	2133	2318	+	AP_crm
Chr11_12587622_12594641	2384	2938	+	GAG_del
Chr11_12587622_12594641	3334	3591	+	AP_del
Chr11_12587622_12594641	3919	4593	+	RT_del
Chr11_12587622_12594641	4728	5078	+	RNaseH_del
Chr11_12587622_12594641	5376	6074	+	INT_del
Chr11_12587622_12594641	6464	6613	+	CHR_retroelement
Chr11_12597711_12605454	2608	3366	+	GAG_crm
Chr11_12597711_12605454	3634	3900	+	AP_crm
Chr11_12597711_12605454	4375	5049	+	RT_crm
Chr11_12597711_12605454	5295	5540	+	RNaseH_crm
Chr11_12597711_12605454	5757	6788	+	INT_crm
Chr11_12617684_12627509	3091	3666	+	GAG_del
Chr11_12617684_12627509	4066	4323	+	AP_del
Chr11_12617684_12627509	4609	5244	+	RT_del
Chr11_12617684_12627509	5380	5730	+	RNaseH_del
Chr11_12617684_12627509	6034	7068	+	INT_del
Chr11_12617684_12627509	7126	7278	+	CHR_retroelement
Chr11_12697104_12710604	2869	3081	+	RT_athila
Chr11_12697104_12710604	7583	7945	+	RNaseH_athila
Chr11_12697104_12710604	10192	10644	+	INT_athila
Chr11_12746478_12756535	2747	3583	+	GAG_del
Chr11_12746478_12756535	3716	3973	+	AP_del
Chr11_12746478_12756535	4301	4975	+	RT_del
Chr11_12746478_12756535	5111	5461	+	RNaseH_del
Chr11_12746478_12756535	5835	6440	+	INT_del
Chr11_12746478_12756535	6858	7007	+	CHR_retroelement
Chr11_12791093_12795511	2325	2810	+	GAG_crm
Chr11_12796904_12810737	3208	3435	+	GAG_tat
Chr11_12796904_12810737	4780	5070	+	AP_tat
Chr11_12796904_12810737	5611	6240	+	RT_tat
Chr11_12796904_12810737	6439	6801	+	RNaseH_tat
Chr11_12796904_12810737	7452	8510	+	INT_tat
Chr11_12823770_12829842	670	1404	+	GAG_tork
Chr11_12823770_12829842	1543	1791	+	AP_tork
Chr11_12823770_12829842	1942	2583	+	INT_tork
Chr11_12823770_12829842	3207	3797	+	RT_tork
Chr11_12823770_12829842	4080	4493	+	RNaseH_tork
Chr11_12873242_12886463	6414	6974	+	GAG_del
Chr11_12873242_12886463	7389	7628	+	AP_del
Chr11_12873242_12886463	7932	8606	+	RT_del
Chr11_12873242_12886463	8742	9092	+	RNaseH_del
Chr11_12873242_12886463	9396	10430	+	INT_del
Chr11_12873242_12886463	10494	10640	+	CHR_retroelement
Chr11_12951760_12961896	3708	4493	+	GAG_del
Chr11_12951760_12961896	4653	4910	+	AP_del
Chr11_12951760_12961896	5196	5870	+	RT_del
Chr11_12951760_12961896	6006	6356	+	RNaseH_del
Chr11_12951760_12961896	6660	7694	+	INT_del
Chr11_12951760_12961896	7758	7904	+	CHR_retroelement
Chr11_12963899_12974301	4250	4816	+	GAG_del
Chr11_12963899_12974301	5209	5466	+	AP_del
Chr11_12963899_12974301	5752	6426	+	RT_del
Chr11_12963899_12974301	6574	6912	+	RNaseH_del
Chr11_12963899_12974301	7215	8249	+	INT_del
Chr11_12963899_12974301	8307	8459	+	CHR_retroelement
Chr11_12974787_12987866	5168	5761	+	GAG_del
Chr11_12974787_12987866	6197	6454	+	AP_del
Chr11_12974787_12987866	6749	7423	+	RT_del
Chr11_12974787_12987866	7559	7789	+	RNaseH_del
Chr11_12974787_12987866	8415	9245	+	INT_del
Chr11_12974787_12987866	9309	9452	+	CHR_retroelement
Chr11_12995105_13001718	1876	2316	+	GAG_tork
Chr11_12995105_13001718	3099	3479	+	INT_tork
Chr11_12995105_13001718	3986	4396	+	RT_tork
Chr11_12995105_13001718	5030	5344	+	RNaseH_tork
Chr11_13047426_13051382	1898	2380	+	GAG_crm
Chr11_13057329_13067072	3999	5015	+	INT_tat
Chr11_13075105_13079458	2258	2755	+	GAG_crm
Chr11_13128809_13138927	3528	3944	+	GAG_del
Chr11_13128809_13138927	4507	4764	+	AP_del
Chr11_13128809_13138927	5051	5707	+	RT_del
Chr11_13128809_13138927	5860	6210	+	RNaseH_del
Chr11_13128809_13138927	6929	7525	+	INT_del
Chr11_13128809_13138927	7586	7735	+	CHR_retroelement
Chr11_13166348_13176407	3031	3846	+	GAG_del
Chr11_13166348_13176407	3979	4236	+	AP_del
Chr11_13166348_13176407	4811	5215	+	RT_del
Chr11_13166348_13176407	5363	5701	+	RNaseH_del
Chr11_13166348_13176407	6004	6669	+	INT_del
Chr11_13166348_13176407	6937	7089	+	CHR_retroelement
Chr11_13313586_13328771	2890	3222	+	AP_tat
Chr11_13313586_13328771	3625	4302	+	RT_tat
Chr11_13313586_13328771	4438	4800	+	RNaseH_tat
Chr11_13313586_13328771	5569	6096	+	INT_tat
Chr11_13354289_13358703	2485	2802	+	GAG_crm
Chr11_13401084_13408801	2121	2879	+	GAG_del
Chr11_13401084_13408801	3108	3365	+	AP_del
Chr11_13401084_13408801	6541	7215	+	RT_del
Chr11_13401084_13408801	7351	7536	+	RNaseH_del
Chr11_13425814_13432950	2632	3072	+	GAG_tork
Chr11_13425814_13432950	3595	4236	+	INT_tork
Chr11_13425814_13432950	4883	5602	+	RT_tork
Chr11_13425814_13432950	5909	6319	+	RNaseH_tork
Chr11_13568098_13580258	7588	8388	+	GAG_del
Chr11_13568098_13580258	8548	8805	+	AP_del
Chr11_13568098_13580258	9091	9765	+	RT_del
Chr11_13568098_13580258	9901	10251	+	RNaseH_del
Chr11_13568098_13580258	10868	11554	+	INT_del
Chr11_13568098_13580258	11612	11764	+	CHR_retroelement
Chr11_13583876_13591622	2616	3374	+	GAG_crm
Chr11_13583876_13591622	3642	3908	+	AP_crm
Chr11_13583876_13591622	4383	5057	+	RT_crm
Chr11_13583876_13591622	5193	5543	+	RNaseH_crm
Chr11_13583876_13591622	5760	6791	+	INT_crm
Chr11_13594363_13603058	4332	4724	+	GAG_del
Chr11_13594363_13603058	5175	5432	+	AP_del
Chr11_13594363_13603058	5730	6404	+	RT_del
Chr11_13594363_13603058	6540	6890	+	RNaseH_del
Chr11_13594363_13603058	8277	8420	+	CHR_retroelement
Chr11_13604870_13614606	3449	3802	+	GAG_del
Chr11_13604870_13614606	4420	4677	+	AP_del
Chr11_13604870_13614606	5016	5639	+	RT_del
Chr11_13604870_13614606	5775	6125	+	RNaseH_del
Chr11_13604870_13614606	6429	7463	+	INT_del
Chr11_13604870_13614606	7521	7673	+	CHR_retroelement
Chr11_13728495_13739986	2094	2804	+	GAG_tat
Chr11_13728495_13739986	3162	3494	+	AP_tat
Chr11_13728495_13739986	3897	4571	+	RT_tat
Chr11_13728495_13739986	4707	5069	+	RNaseH_tat
Chr11_13728495_13739986	5835	6884	+	INT_tat
Chr11_13816106_13831051	6414	7016	+	GAG_del
Chr11_13816106_13831051	7404	7661	+	AP_del
Chr11_13816106_13831051	7959	8633	+	RT_del
Chr11_13816106_13831051	8769	9119	+	RNaseH_del
Chr11_13816106_13831051	9423	10457	+	INT_del
Chr11_13816106_13831051	10518	10664	+	CHR_retroelement
Chr11_13900899_13911803	3485	4243	+	GAG_del
Chr11_13900899_13911803	4472	4729	+	AP_del
Chr11_13900899_13911803	5027	5701	+	RT_del
Chr11_13900899_13911803	5799	6833	+	INT_del
Chr11_13900899_13911803	6897	7040	+	CHR_retroelement
Chr11_14079299_14092064	9938	10249	+	GAG_athila
Chr11_14101620_14108791	2142	2477	+	GAG_athila
Chr11_14189680_14200985	1804	2511	+	GAG_tat
Chr11_14189680_14200985	2869	3201	+	AP_tat
Chr11_14189680_14200985	3634	4311	+	RT_tat
Chr11_14189680_14200985	4447	4827	+	RNaseH_tat
Chr11_14189680_14200985	5557	6597	+	INT_tat
Chr11_14207458_14221457	2179	2403	+	GAG_tat
Chr11_14207458_14221457	12725	12964	+	INT_tat
Chr11_14468602_14475723	5516	5812	+	GAG_crm
Chr11_14589567_14600221	3431	4249	+	GAG_del
Chr11_14589567_14600221	4382	4639	+	AP_del
Chr11_14589567_14600221	4967	5641	+	RT_del
Chr11_14589567_14600221	5777	6127	+	RNaseH_del
Chr11_14589567_14600221	6431	7465	+	INT_del
Chr11_14589567_14600221	7526	7675	+	CHR_retroelement
Chr11_14724935_14735974	2038	2748	+	GAG_tat
Chr11_14724935_14735974	3106	3207	+	AP_tat
Chr11_14724935_14735974	8030	9073	+	INT_tat
Chr11_14790998_14802241	2109	2747	+	GAG_tat
Chr11_14790998_14802241	3105	3437	+	AP_tat
Chr11_14790998_14802241	3839	4516	+	RT_tat
Chr11_14790998_14802241	4652	5011	+	RNaseH_tat
Chr11_14790998_14802241	5776	6819	+	INT_tat
Chr11_14867658_14878526	2303	2788	+	GAG_athila
Chr11_14867658_14878526	3827	4108	+	AP_athila
Chr11_14898110_14907377	2164	2730	+	GAG_del
Chr11_14898110_14907377	3136	3393	+	AP_del
Chr11_14898110_14907377	3679	4353	+	RT_del
Chr11_14898110_14907377	4489	4839	+	RNaseH_del
Chr11_14898110_14907377	5143	6174	+	INT_del
Chr11_14898110_14907377	6232	6384	+	CHR_retroelement
Chr11_14984006_14993117	3812	4609	+	GAG_del
Chr11_14984006_14993117	4745	4990	+	AP_del
Chr11_14984006_14993117	5520	5996	+	RT_del
Chr11_14984006_14993117	6132	6455	+	RNaseH_del
Chr11_14984006_14993117	6785	7819	+	INT_del
Chr11_14984006_14993117	7880	8029	+	CHR_retroelement
Chr11_15035872_15042134	3998	4558	+	GAG_del
Chr11_15086285_15092928	2724	3287	+	GAG_del
Chr11_15138835_15148169	1573	2031	+	GAG_athila
Chr11_15138835_15148169	3061	3342	+	AP_athila
Chr11_15152699_15162480	2396	3160	+	GAG_del
Chr11_15152699_15162480	3293	3550	+	AP_del
Chr11_15152699_15162480	3878	4552	+	RT_del
Chr11_15152699_15162480	4687	5037	+	RNaseH_del
Chr11_15152699_15162480	5341	6375	+	INT_del
Chr11_15152699_15162480	6436	6585	+	CHR_retroelement
Chr11_15183902_15195596	4719	5378	+	GAG_del
Chr11_15183902_15195596	5665	5922	+	AP_del
Chr11_15183902_15195596	6208	6882	+	RT_del
Chr11_15183902_15195596	7018	7368	+	RNaseH_del
Chr11_15183902_15195596	7672	8706	+	INT_del
Chr11_15183902_15195596	8767	8916	+	CHR_retroelement
Chr11_15520511_15526934	1402	1878	+	GAG_athila
Chr11_15565470_15575820	5664	6422	+	GAG_del
Chr11_15565470_15575820	6651	6905	+	AP_del
Chr11_15565470_15575820	7206	7880	+	RT_del
Chr11_15565470_15575820	8016	8366	+	RNaseH_del
Chr11_15565470_15575820	8670	9704	+	INT_del
Chr11_15565470_15575820	9768	9911	+	CHR_retroelement
Chr11_15592208_15596589	2287	2769	+	GAG_crm
Chr11_15641086_15652449	2060	2761	+	GAG_tat
Chr11_15641086_15652449	3123	3455	+	AP_tat
Chr11_15641086_15652449	4031	4480	+	RT_tat
Chr11_15641086_15652449	4616	4978	+	RNaseH_tat
Chr11_15641086_15652449	6145	6789	+	INT_tat
Chr11_1574724_1580707	634	1368	+	GAG_tork
Chr11_1574724_1580707	1507	1755	+	AP_tork
Chr11_1574724_1580707	1906	2547	+	INT_tork
Chr11_1574724_1580707	3031	3756	+	RT_tork
Chr11_1574724_1580707	4039	4452	+	RNaseH_tork
Chr11_15771513_15780737	2558	3376	+	GAG_del
Chr11_15771513_15780737	3509	3766	+	AP_del
Chr11_15771513_15780737	4094	4768	+	RT_del
Chr11_15771513_15780737	4904	5254	+	RNaseH_del
Chr11_15771513_15780737	5558	6592	+	INT_del
Chr11_15771513_15780737	6650	6802	+	CHR_retroelement
Chr11_15919425_15925659	831	1565	+	GAG_tork
Chr11_15919425_15925659	1704	1952	+	AP_tork
Chr11_15919425_15925659	2103	2744	+	INT_tork
Chr11_15919425_15925659	3228	3953	+	RT_tork
Chr11_15919425_15925659	4236	4646	+	RNaseH_tork
Chr11_15936098_15949326	9270	9443	+	AP_del
Chr11_15936098_15949326	9905	10474	+	RT_del
Chr11_15936098_15949326	10622	10960	+	RNaseH_del
Chr11_15936098_15949326	11210	12238	+	INT_del
Chr11_15936098_15949326	12296	12442	+	CHR_retroelement
Chr11_15963531_15974777	1945	2262	+	GAG_athila
Chr11_15978390_15991998	3009	3230	+	GAG_tat
Chr11_15978390_15991998	4578	4865	+	AP_tat
Chr11_15978390_15991998	5414	6082	+	RT_tat
Chr11_15978390_15991998	6230	6574	+	RNaseH_tat
Chr11_15978390_15991998	7227	8006	+	INT_tat
Chr11_16025112_16034761	2431	3213	+	GAG_del
Chr11_16025112_16034761	3373	3630	+	AP_del
Chr11_16025112_16034761	3916	4590	+	RT_del
Chr11_16025112_16034761	4726	5076	+	RNaseH_del
Chr11_16025112_16034761	5380	6414	+	INT_del
Chr11_16025112_16034761	6475	6624	+	CHR_retroelement
Chr11_16047024_16052348	1285	2220	+	GAG_sire
Chr11_16047024_16052348	2684	2923	+	AP_sire
Chr11_16047024_16052348	3077	3724	+	INT_sire
Chr11_16187140_16193154	2036	2272	+	GAG_crm
Chr11_16230582_16242207	1665	2051	+	GAG_tat
Chr11_16230582_16242207	2853	3182	+	AP_tat
Chr11_16230582_16242207	3573	4250	+	RT_tat
Chr11_16230582_16242207	4389	4748	+	RNaseH_tat
Chr11_16230582_16242207	5478	6506	+	INT_tat
Chr11_16343705_16352069	1268	1567	+	GAG_athila
Chr11_16343705_16352069	3509	3805	+	AP_tat
Chr11_16343705_16352069	4416	5102	+	RT_tat
Chr11_16343705_16352069	5244	5555	+	RNaseH_tat
Chr11_16343705_16352069	6533	7588	+	INT_tat
Chr11_16471451_16485581	4688	5395	+	GAG_tat
Chr11_16471451_16485581	5753	6085	+	AP_tat
Chr11_16471451_16485581	6518	7195	+	RT_tat
Chr11_16471451_16485581	7331	7711	+	RNaseH_tat
Chr11_16471451_16485581	8438	9346	+	INT_tat
Chr11_16539441_16554006	4014	4748	+	GAG_tork
Chr11_16539441_16554006	4887	5114	+	AP_tork
Chr11_16539441_16554006	5265	5906	+	INT_tork
Chr11_16539441_16554006	6390	6584	+	RT_tork
Chr11_16539441_16554006	6643	7056	+	RNaseH_tork
Chr11_16610590_16621508	1807	2514	+	GAG_tat
Chr11_16610590_16621508	2872	3180	+	AP_tat
Chr11_16610590_16621508	3209	3886	+	RT_tat
Chr11_16610590_16621508	4022	4402	+	RNaseH_tat
Chr11_16610590_16621508	5130	6173	+	INT_tat
Chr11_16670763_16683806	1923	2675	+	GAG_tat
Chr11_16670763_16683806	3114	3437	+	AP_tat
Chr11_16670763_16683806	3663	3830	+	RT_tat
Chr11_16670763_16683806	6336	7379	+	INT_tat
Chr11_16716048_16719562	2822	3178	+	GAG_del
Chr11_16901223_16907340	1304	1810	+	GAG_sire
Chr11_17089223_17096886	1815	2318	+	GAG_tat
Chr11_17089223_17096886	2344	3006	+	INT_tat
Chr11_17135214_17147766	2201	2800	+	GAG_tat
Chr11_17135214_17147766	3158	3469	+	AP_tat
Chr11_17135214_17147766	3893	4570	+	RT_tat
Chr11_17135214_17147766	4743	5069	+	RNaseH_tat
Chr11_17135214_17147766	5837	6880	+	INT_tat
Chr11_17148170_17159071	1696	2403	+	GAG_tat
Chr11_17148170_17159071	2764	3096	+	AP_tat
Chr11_17148170_17159071	3578	3910	+	RT_tat
Chr11_17148170_17159071	4046	4426	+	RNaseH_tat
Chr11_17148170_17159071	5150	6193	+	INT_tat
Chr11_17170176_17176813	1146	1892	+	GAG_tork
Chr11_17170176_17176813	2010	2258	+	AP_tork
Chr11_17170176_17176813	2406	3047	+	INT_tork
Chr11_17170176_17176813	3531	4259	+	RT_tork
Chr11_17170176_17176813	4542	4955	+	RNaseH_tork
Chr11_17356502_17368095	1672	1956	+	GAG_tat
Chr11_17356502_17368095	2859	3188	+	AP_tat
Chr11_17356502_17368095	3824	4255	+	RT_tat
Chr11_17356502_17368095	4394	4753	+	RNaseH_tat
Chr11_17356502_17368095	5477	6484	+	INT_tat
Chr11_17443934_17450985	3386	3613	+	AP_sire
Chr11_17443934_17450985	4269	4619	+	RT_sire
Chr11_17443934_17450985	4929	5330	+	RNaseH_sire
Chr11_17526900_17533171	3271	3543	+	GAG_tork
Chr11_17715092_17720685	1274	1690	+	GAG_tork
Chr11_17715092_17720685	1829	2077	+	AP_tork
Chr11_17715092_17720685	2228	2869	+	INT_tork
Chr11_17715092_17720685	3353	4078	+	RT_tork
Chr11_17715092_17720685	4361	4774	+	RNaseH_tork
Chr11_17751056_17763978	2064	2543	+	GAG_tat
Chr11_17751056_17763978	3237	3563	+	AP_tat
Chr11_17751056_17763978	3789	3956	+	RT_tat
Chr11_17751056_17763978	6270	7313	+	INT_tat
Chr11_1787879_1794163	3812	4966	-	GAG_sire
Chr11_17879238_17884465	1703	1924	+	AP_ty1/copia
Chr11_17879238_17884465	2108	2746	+	INT_retrofit
Chr11_17879238_17884465	3616	4293	+	RT_tork
Chr11_17879238_17884465	4585	4989	+	RNaseH_retrofit
Chr11_17957240_17968964	4179	4775	+	GAG_del
Chr11_17957240_17968964	5254	5418	+	AP_del
Chr11_17957240_17968964	5712	6386	+	RT_del
Chr11_17957240_17968964	6522	6872	+	RNaseH_del
Chr11_17957240_17968964	7176	7760	+	INT_del
Chr11_17957240_17968964	8270	8416	+	CHR_retroelement
Chr11_18017108_18028321	1644	2138	+	GAG_tat
Chr11_18017108_18028321	2649	2807	+	AP_tat
Chr11_18017108_18028321	3198	3875	+	RT_tat
Chr11_18017108_18028321	4012	4371	+	RNaseH_tat
Chr11_18017108_18028321	5302	6090	+	INT_tat
Chr11_18063048_18068177	718	1155	+	GAG_reina
Chr11_18063048_18068177	1633	1887	+	AP_reina
Chr11_18063048_18068177	2260	2409	+	RT_reina
Chr11_18063048_18068177	3099	3449	+	RNaseH_reina
Chr11_18063048_18068177	3687	4712	+	INT_reina
Chr11_18214514_18224601	4253	5077	+	GAG_del
Chr11_18214514_18224601	5210	5467	+	AP_del
Chr11_18214514_18224601	5797	6468	+	RT_del
Chr11_18214514_18224601	6616	6954	+	RNaseH_del
Chr11_18214514_18224601	8353	8502	+	CHR_retroelement
Chr11_18257642_18266716	1793	2110	+	RNaseH_tat
Chr11_18257642_18266716	2762	3502	+	INT_tat
Chr11_18709495_18715927	1033	1767	+	GAG_tork
Chr11_18709495_18715927	1906	2154	+	AP_tork
Chr11_18709495_18715927	2305	2946	+	INT_tork
Chr11_18709495_18715927	3430	4155	+	RT_tork
Chr11_18709495_18715927	4438	4851	+	RNaseH_tork
Chr11_18722698_18726628	1829	2323	+	GAG_crm
Chr11_18754129_18767018	1866	2618	+	GAG_tat
Chr11_18754129_18767018	3039	3365	+	AP_tat
Chr11_18754129_18767018	3591	3758	+	RT_tat
Chr11_18754129_18767018	6264	7307	+	INT_tat
Chr11_18795747_18801979	831	1565	+	GAG_tork
Chr11_18795747_18801979	1704	1952	+	AP_tork
Chr11_18795747_18801979	2103	2744	+	INT_tork
Chr11_18795747_18801979	3228	3953	+	RT_tork
Chr11_18795747_18801979	4236	4649	+	RNaseH_tork
Chr11_18846490_18857291	2084	2794	+	GAG_tat
Chr11_18846490_18857291	2970	3140	+	AP_tat
Chr11_18846490_18857291	3543	4220	+	RT_tat
Chr11_18846490_18857291	4356	4718	+	RNaseH_tat
Chr11_18846490_18857291	5515	6540	+	INT_tat
Chr11_18888573_18894044	954	1427	+	GAG_reina
Chr11_18888573_18894044	1851	2111	+	AP_reina
Chr11_18888573_18894044	2484	3158	+	RT_reina
Chr11_18888573_18894044	3294	3644	+	RNaseH_reina
Chr11_18888573_18894044	3882	4904	+	INT_reina
Chr11_19001253_19008770	2341	3114	+	GAG_crm
Chr11_19001253_19008770	3364	3630	+	AP_crm
Chr11_19001253_19008770	4141	4815	+	RT_crm
Chr11_19001253_19008770	4951	5301	+	RNaseH_crm
Chr11_19001253_19008770	5518	6540	+	INT_crm
Chr11_1960928_1965376	2364	2861	+	GAG_crm
Chr11_1972970_1978749	359	1093	+	GAG_tork
Chr11_1972970_1978749	1232	1480	+	AP_tork
Chr11_1972970_1978749	1631	2272	+	INT_tork
Chr11_1972970_1978749	2756	3481	+	RT_tork
Chr11_1972970_1978749	3764	4177	+	RNaseH_tork
Chr11_19782124_19788755	3499	4014	+	GAG_del
Chr11_19903845_19913093	408	665	+	AP_del
Chr11_19903845_19913093	1026	1694	+	RT_del
Chr11_19903845_19913093	1830	2180	+	RNaseH_del
Chr11_19903845_19913093	2475	3464	+	INT_del
Chr11_19903845_19913093	6708	6851	+	CHR_retroelement
Chr11_20052550_20061899	1520	2107	+	INT_tat
Chr11_20156837_20169841	2058	2543	+	GAG_tat
Chr11_20156837_20169841	3231	3557	+	AP_tat
Chr11_20156837_20169841	3783	3950	+	RT_tat
Chr11_20156837_20169841	6264	7307	+	INT_tat
Chr11_20242253_20254734	1949	2428	+	GAG_tat
Chr11_20242253_20254734	3122	3448	+	AP_tat
Chr11_20242253_20254734	3674	3841	+	RT_tat
Chr11_20242253_20254734	4925	5323	+	RNaseH_tat
Chr11_20242253_20254734	5771	6814	+	INT_tat
Chr11_20464843_20471076	830	1564	+	GAG_tork
Chr11_20464843_20471076	1703	1951	+	AP_tork
Chr11_20464843_20471076	2166	2753	+	INT_tork
Chr11_20464843_20471076	3237	3962	+	RT_tork
Chr11_20464843_20471076	4245	4658	+	RNaseH_tork
Chr11_20637377_20643017	1051	1374	+	GAG_reina
Chr11_20637377_20643017	1989	2243	+	AP_reina
Chr11_20637377_20643017	2619	3293	+	RT_reina
Chr11_20637377_20643017	3432	3779	+	RNaseH_reina
Chr11_20637377_20643017	4017	4907	+	INT_reina
Chr11_20637377_20643017	5099	5248	+	CHR_retroelement
Chr11_20661086_20667049	2018	2527	+	GAG_tork
Chr11_20661086_20667049	2742	2918	+	AP_tork
Chr11_20661086_20667049	4822	5022	+	RNaseH_tork
Chr11_20774449_20776536	790	1203	+	RNaseH_tork
Chr11_20846950_20855498	3759	4544	+	GAG_del
Chr11_20846950_20855498	4704	4961	+	AP_del
Chr11_20846950_20855498	5247	5921	+	RT_del
Chr11_20846950_20855498	6057	6407	+	RNaseH_del
Chr11_20846950_20855498	6711	7094	+	INT_del
Chr11_20887971_20893307	1457	1987	+	GAG_retrofit
Chr11_20887971_20893307	2393	2692	+	AP_ty1/copia
Chr11_20887971_20893307	2807	3442	+	INT_retrofit
Chr11_20887971_20893307	4232	4945	+	RT_tork
Chr11_20912403_20923606	3974	4759	+	GAG_del
Chr11_20912403_20923606	4919	5176	+	AP_del
Chr11_20912403_20923606	5462	6136	+	RT_del
Chr11_20912403_20923606	6272	6622	+	RNaseH_del
Chr11_20912403_20923606	7087	7725	+	INT_del
Chr11_20912403_20923606	8010	8159	+	CHR_retroelement
Chr11_20998910_21003257	2611	2913	+	GAG_tork
Chr11_20998910_21003257	3419	3658	+	AP_tork
Chr11_21011220_21017013	419	1165	+	GAG_tork
Chr11_21011220_21017013	1283	1531	+	AP_tork
Chr11_21011220_21017013	1686	2321	+	INT_tork
Chr11_21011220_21017013	2805	3533	+	RT_tork
Chr11_21011220_21017013	3816	4229	+	RNaseH_tork
Chr11_21086351_21099199	2126	2377	+	GAG_athila
Chr11_21086351_21099199	3714	4016	+	AP_tat
Chr11_21086351_21099199	4549	5232	+	RT_tat
Chr11_21086351_21099199	5377	5739	+	RNaseH_tat
Chr11_21086351_21099199	6391	7449	+	INT_tat
Chr11_21117668_21120193	424	819	-	RNaseH_tat
Chr11_21117668_21120193	1759	2085	-	INT_tat
Chr11_21117668_21120193	2034	2309	-	GAG_tat
Chr11_21223782_21232729	5368	5661	+	AP_ty1/copia
Chr11_21223782_21232729	5758	6396	+	INT_retrofit
Chr11_21223782_21232729	7335	8042	+	RT_tork
Chr11_21223782_21232729	8343	8747	+	RNaseH_retrofit
Chr11_21310102_21322146	7027	7839	+	GAG_del
Chr11_21310102_21322146	8005	8262	+	AP_del
Chr11_21310102_21322146	8548	9222	+	RT_del
Chr11_21310102_21322146	9358	9708	+	RNaseH_del
Chr11_21310102_21322146	10012	11046	+	INT_del
Chr11_21310102_21322146	11104	11256	+	CHR_retroelement
Chr11_21340299_21353386	269	1135	+	GAG_retrofit
Chr11_21340299_21353386	1217	1462	+	AP_retrofit
Chr11_21340299_21353386	1619	2035	+	INT_retrofit
Chr11_21340299_21353386	7738	8466	+	RT_retrofit
Chr11_21340299_21353386	11930	12280	+	RNaseH_retrofit
Chr11_21421312_21427530	1874	2548	+	RT_del
Chr11_21421312_21427530	2684	3034	+	RNaseH_del
Chr11_21421312_21427530	3338	4372	+	INT_del
Chr11_21421312_21427530	4436	4582	+	CHR_retroelement
Chr11_21429035_21441204	1875	2354	+	GAG_tat
Chr11_21429035_21441204	3048	3374	+	AP_tat
Chr11_21429035_21441204	3600	3767	+	RT_tat
Chr11_21429035_21441204	6273	7316	+	INT_tat
Chr11_21596672_21602344	1082	1702	+	GAG_tork
Chr11_21596672_21602344	1802	2056	+	AP_tork
Chr11_21596672_21602344	2225	2881	+	INT_tork
Chr11_21596672_21602344	3549	4280	+	RT_tork
Chr11_21596672_21602344	4587	4991	+	RNaseH_tork
Chr11_21614046_21625465	2017	2727	+	GAG_tat
Chr11_21614046_21625465	3085	3417	+	AP_tat
Chr11_21614046_21625465	3820	4122	+	RT_tat
Chr11_21614046_21625465	4634	4996	+	RNaseH_tat
Chr11_21614046_21625465	5765	6808	+	INT_tat
Chr11_21942976_21956441	2835	3098	+	GAG_tat
Chr11_21942976_21956441	4414	4722	+	AP_tat
Chr11_21942976_21956441	5249	5932	+	RT_tat
Chr11_21942976_21956441	6076	6294	+	RNaseH_tat
Chr11_21942976_21956441	7089	8147	+	INT_tat
Chr11_22103399_22116109	5341	6159	+	GAG_del
Chr11_22103399_22116109	6292	6549	+	AP_del
Chr11_22103399_22116109	6877	7551	+	RT_del
Chr11_22103399_22116109	7687	7869	+	RNaseH_del
Chr11_22103399_22116109	8049	9083	+	INT_del
Chr11_22103399_22116109	9141	9293	+	CHR_retroelement
Chr11_22288837_22295596	2127	2744	+	GAG_tork
Chr11_22288837_22295596	2844	3098	+	AP_tork
Chr11_22288837_22295596	3267	3932	+	INT_tork
Chr11_22288837_22295596	4602	5333	+	RT_tork
Chr11_22288837_22295596	5640	5951	+	RNaseH_tork
Chr11_22337468_22342021	3071	3268	-	GAG_tat
Chr11_22395702_22408509	1872	2357	+	GAG_tat
Chr11_22395702_22408509	3045	3371	+	AP_tat
Chr11_22395702_22408509	3597	3764	+	RT_tat
Chr11_22395702_22408509	6260	7303	+	INT_tat
Chr11_22583145_22595744	5115	5933	+	GAG_del
Chr11_22583145_22595744	6066	6323	+	AP_del
Chr11_22583145_22595744	6651	7325	+	RT_del
Chr11_22583145_22595744	7461	7811	+	RNaseH_del
Chr11_22583145_22595744	8115	9149	+	INT_del
Chr11_22583145_22595744	9207	9359	+	CHR_retroelement
Chr11_22711865_22717207	1876	2355	+	GAG_tat
Chr11_22711865_22717207	2552	2854	+	INT_tat
Chr11_22711865_22717207	3795	4034	+	RNaseH_tat
Chr11_23087287_23100728	5239	5997	+	GAG_del
Chr11_23087287_23100728	6226	6483	+	AP_del
Chr11_23087287_23100728	6781	7455	+	RT_del
Chr11_23087287_23100728	7591	7941	+	RNaseH_del
Chr11_23087287_23100728	8245	9123	+	INT_del
Chr11_23087287_23100728	9344	9487	+	CHR_retroelement
Chr11_23710434_23722942	4696	5289	+	GAG_del
Chr11_23710434_23722942	5725	5982	+	AP_del
Chr11_23710434_23722942	6277	6951	+	RT_del
Chr11_23710434_23722942	7087	7437	+	RNaseH_del
Chr11_23710434_23722942	7741	8775	+	INT_del
Chr11_23710434_23722942	8836	8982	+	CHR_retroelement
Chr11_23829630_23839462	1078	2247	+	GAG_sire
Chr11_23877001_23890013	1929	2408	+	GAG_tat
Chr11_23877001_23890013	3102	3428	+	AP_tat
Chr11_23877001_23890013	3840	4517	+	RT_tat
Chr11_23877001_23890013	5207	5518	+	RNaseH_tat
Chr11_23877001_23890013	6326	7369	+	INT_tat
Chr11_24020000_24031947	1817	2197	+	GAG_tat
Chr11_24020000_24031947	2999	3328	+	AP_tat
Chr11_24020000_24031947	3719	4396	+	RT_tat
Chr11_24020000_24031947	4535	4894	+	RNaseH_tat
Chr11_24020000_24031947	5622	6188	+	INT_tat
Chr11_24127925_24132929	1588	1830	+	AP_retrofit
Chr11_24127925_24132929	1981	2616	+	INT_retrofit
Chr11_24127925_24132929	3385	4110	+	RT_retrofit
Chr11_24127925_24132929	4399	4800	+	RNaseH_retrofit
Chr11_24134965_24140994	1407	2024	+	GAG_tork
Chr11_24134965_24140994	2124	2378	+	AP_tork
Chr11_24134965_24140994	2547	3212	+	INT_tork
Chr11_24134965_24140994	4069	4611	+	RT_tork
Chr11_24134965_24140994	4918	5322	+	RNaseH_tork
Chr11_24142340_24153620	5832	6221	+	GAG_del
Chr11_24142340_24153620	6847	7104	+	AP_del
Chr11_24142340_24153620	7399	8073	+	RT_del
Chr11_24142340_24153620	8209	8559	+	RNaseH_del
Chr11_24142340_24153620	8863	9891	+	INT_del
Chr11_24142340_24153620	9958	10104	+	CHR_retroelement
Chr11_24350511_24363160	4813	5415	+	GAG_del
Chr11_24350511_24363160	5999	6100	+	AP_del
Chr11_24350511_24363160	6395	7069	+	RT_del
Chr11_24350511_24363160	7205	7555	+	RNaseH_del
Chr11_24350511_24363160	7859	8893	+	INT_del
Chr11_24350511_24363160	8963	9100	+	CHR_retroelement
Chr11_24424052_24437030	1943	2695	+	GAG_tat
Chr11_24424052_24437030	3116	3433	+	AP_tat
Chr11_24424052_24437030	3647	3814	+	RT_tat
Chr11_24424052_24437030	6319	7362	+	INT_tat
Chr11_24441068_24445955	415	708	+	GAG_retrofit
Chr11_24441068_24445955	1311	1562	+	AP_retrofit
Chr11_24441068_24445955	1704	2342	+	INT_retrofit
Chr11_24441068_24445955	3173	3898	+	RT_retrofit
Chr11_24441068_24445955	4190	4594	+	RNaseH_retrofit
Chr11_24508417_24513426	2470	3210	+	GAG_crm
Chr11_24508417_24513426	3487	3753	+	AP_crm
Chr11_24738416_24749838	2081	2791	+	GAG_tat
Chr11_24738416_24749838	3149	3481	+	AP_tat
Chr11_24738416_24749838	3884	4561	+	RT_tat
Chr11_24738416_24749838	4697	5059	+	RNaseH_tat
Chr11_24738416_24749838	5797	6840	+	INT_tat
Chr11_24869151_24877467	1567	1683	+	RNaseH_tat
Chr11_24869151_24877467	2901	3740	+	INT_tat
Chr11_24878374_24890309	2607	2888	+	GAG_tat
Chr11_24878374_24890309	4241	4510	+	AP_tat
Chr11_24878374_24890309	5193	5642	+	RT_tat
Chr11_24878374_24890309	5787	6149	+	RNaseH_tat
Chr11_24878374_24890309	7024	7398	+	INT_tat
Chr11_25066223_25077517	1794	2498	+	GAG_tat
Chr11_25066223_25077517	2856	3188	+	AP_tat
Chr11_25066223_25077517	3621	4298	+	RT_tat
Chr11_25066223_25077517	4434	4814	+	RNaseH_tat
Chr11_25066223_25077517	5541	6584	+	INT_tat
Chr11_25370238_25383148	1899	2651	+	GAG_tat
Chr11_25370238_25383148	3072	3398	+	AP_tat
Chr11_25370238_25383148	3624	3791	+	RT_tat
Chr11_25370238_25383148	5142	5489	+	RNaseH_tat
Chr11_25370238_25383148	6297	7340	+	INT_tat
Chr11_25448900_25460901	4756	5541	+	GAG_del
Chr11_25448900_25460901	5701	5958	+	AP_del
Chr11_25448900_25460901	6244	6918	+	RT_del
Chr11_25448900_25460901	7054	7404	+	RNaseH_del
Chr11_25448900_25460901	7708	8742	+	INT_del
Chr11_25448900_25460901	8803	8952	+	CHR_retroelement
Chr11_25479647_25490962	1806	2513	+	GAG_tat
Chr11_25479647_25490962	2871	3203	+	AP_tat
Chr11_25479647_25490962	3636	4313	+	RT_tat
Chr11_25479647_25490962	4449	4829	+	RNaseH_tat
Chr11_25479647_25490962	5556	6599	+	INT_tat
Chr11_25666150_25679380	2554	2781	+	GAG_tat
Chr11_25666150_25679380	4141	4455	+	AP_tat
Chr11_25666150_25679380	4982	5665	+	RT_tat
Chr11_25666150_25679380	5810	6172	+	RNaseH_tat
Chr11_25666150_25679380	6824	7882	+	INT_tat
Chr11_25681792_25693780	4748	5533	+	GAG_del
Chr11_25681792_25693780	5693	5950	+	AP_del
Chr11_25681792_25693780	6236	6910	+	RT_del
Chr11_25681792_25693780	7046	7396	+	RNaseH_del
Chr11_25681792_25693780	7700	8734	+	INT_del
Chr11_25681792_25693780	8795	8944	+	CHR_retroelement
Chr11_25726763_25734771	552	1241	+	GAG_oryco
Chr11_25726763_25734771	1568	1813	+	AP_oryco
Chr11_25726763_25734771	1964	2617	+	INT_oryco
Chr11_25726763_25734771	6150	6851	+	RT_oryco
Chr11_25726763_25734771	7164	7568	+	RNaseH_oryco
Chr11_26003971_26015216	4989	5504	+	GAG_del
Chr11_26077309_26081695	308	1159	+	GAG_retrofit
Chr11_26077309_26081695	1247	1492	+	AP_retrofit
Chr11_26077309_26081695	1858	2286	+	INT_retrofit
Chr11_26077309_26081695	3091	3390	+	RT_retrofit
Chr11_26077309_26081695	3682	3834	+	RNaseH_retrofit
Chr11_26111314_26127460	5709	6077	+	RT_del
Chr11_26111314_26127460	6520	6870	+	RNaseH_del
Chr11_26111314_26127460	7174	7890	+	INT_del
Chr11_26111314_26127460	12502	12648	+	CHR_retroelement
Chr11_26180935_26192236	1794	2498	+	GAG_tat
Chr11_26180935_26192236	2856	3188	+	AP_tat
Chr11_26180935_26192236	3621	4304	+	RT_tat
Chr11_26180935_26192236	4440	4820	+	RNaseH_tat
Chr11_26180935_26192236	5547	6590	+	INT_tat
Chr11_26239479_26250128	3250	3525	+	GAG_del
Chr11_26239479_26250128	4211	4468	+	AP_del
Chr11_26239479_26250128	4796	5470	+	RT_del
Chr11_26239479_26250128	5606	5956	+	RNaseH_del
Chr11_26239479_26250128	6260	7294	+	INT_del
Chr11_26239479_26250128	7355	7507	+	CHR_retroelement
Chr11_26360431_26373128	1701	2198	+	GAG_tat
Chr11_26360431_26373128	2874	3200	+	AP_tat
Chr11_26360431_26373128	3426	3593	+	RT_tat
Chr11_26360431_26373128	6099	7142	+	INT_tat
Chr11_26621754_26633063	1811	2518	+	GAG_tat
Chr11_26621754_26633063	2876	3184	+	AP_tat
Chr11_26621754_26633063	3641	4318	+	RT_tat
Chr11_26621754_26633063	4454	4834	+	RNaseH_tat
Chr11_26621754_26633063	5561	6604	+	INT_tat
Chr11_26647767_26659847	4086	4880	+	GAG_del
Chr11_26647767_26659847	5115	5372	+	AP_del
Chr11_26647767_26659847	5667	6341	+	RT_del
Chr11_26647767_26659847	6477	6827	+	RNaseH_del
Chr11_26647767_26659847	7131	8165	+	INT_del
Chr11_26647767_26659847	8226	8372	+	CHR_retroelement
Chr11_26851007_26857166	1610	2224	+	GAG_tork
Chr11_26851007_26857166	2324	2563	+	AP_tork
Chr11_26851007_26857166	2747	3127	+	INT_tork
Chr11_26851007_26857166	4039	4770	+	RT_tork
Chr11_26851007_26857166	5077	5481	+	RNaseH_tork
Chr11_26924792_26931697	2000	2809	+	GAG_tork
Chr11_26924792_26931697	2906	3160	+	AP_tork
Chr11_26924792_26931697	3338	4009	+	INT_tork
Chr11_26924792_26931697	4640	5371	+	RT_tork
Chr11_26924792_26931697	5678	6088	+	RNaseH_tork
Chr11_27062207_27074281	4640	5263	+	GAG_del
Chr11_27062207_27074281	5621	5878	+	AP_del
Chr11_27062207_27074281	6164	6838	+	RT_del
Chr11_27062207_27074281	6974	7324	+	RNaseH_del
Chr11_27062207_27074281	7628	8662	+	INT_del
Chr11_27062207_27074281	8720	8872	+	CHR_retroelement
Chr11_27091493_27100455	1476	2084	+	GAG_tat
Chr11_27091493_27100455	2781	3110	+	AP_tat
Chr11_27091493_27100455	3501	4178	+	RT_tat
Chr11_27091493_27100455	4314	4676	+	RNaseH_tat
Chr11_27091493_27100455	5379	6410	+	INT_tat
Chr11_27355759_27361204	835	1290	+	GAG_reina
Chr11_27355759_27361204	1729	1983	+	AP_reina
Chr11_27355759_27361204	2356	3030	+	RT_reina
Chr11_27355759_27361204	3166	3516	+	RNaseH_reina
Chr11_27355759_27361204	3754	4776	+	INT_reina
Chr11_27369084_27380380	1803	2507	+	GAG_tat
Chr11_27369084_27380380	2865	3197	+	AP_tat
Chr11_27369084_27380380	3630	4307	+	RT_tat
Chr11_27369084_27380380	4443	4823	+	RNaseH_tat
Chr11_27369084_27380380	5550	6593	+	INT_tat
Chr11_27412113_27415521	130	396	+	AP_ty1/copia
Chr11_27597996_27603231	626	1411	+	GAG_oryco
Chr11_27597996_27603231	1634	1879	+	AP_oryco
Chr11_27597996_27603231	2030	2683	+	INT_oryco
Chr11_27597996_27603231	3308	4033	+	RT_oryco
Chr11_27597996_27603231	4319	4723	+	RNaseH_oryco
Chr11_27628398_27641285	1876	2628	+	GAG_tat
Chr11_27628398_27641285	3049	3375	+	AP_tat
Chr11_27628398_27641285	3601	3768	+	RT_tat
Chr11_27628398_27641285	5069	5467	+	RNaseH_tat
Chr11_27628398_27641285	6275	7318	+	INT_tat
Chr11_27765677_27772052	2815	3051	+	AP_ty1/copia
Chr11_27765677_27772052	3204	3836	+	INT_retrofit
Chr11_27765677_27772052	4766	5473	+	RT_tork
Chr11_27765677_27772052	5774	6178	+	RNaseH_sire
Chr11_28037498_28050485	1917	2399	+	GAG_tat
Chr11_28037498_28050485	3090	3416	+	AP_tat
Chr11_28037498_28050485	3642	3809	+	RT_tat
Chr11_28037498_28050485	6314	7357	+	INT_tat
Chr11_28196737_28209515	1886	2635	+	GAG_tat
Chr11_28196737_28209515	3056	3382	+	AP_tat
Chr11_28196737_28209515	3608	3775	+	RT_tat
Chr11_28196737_28209515	6281	7324	+	INT_tat
Chr11_28421791_28425262	707	1432	+	RT_sire
Chr11_28421791_28425262	1718	2119	+	RNaseH_sire
Chr11_28520708_28533686	1911	2342	+	GAG_tat
Chr11_28520708_28533686	3084	3410	+	AP_tat
Chr11_28520708_28533686	3636	3803	+	RT_tat
Chr11_28520708_28533686	6309	7352	+	INT_tat
Chr11_28661532_28676451	3166	3498	+	AP_tat
Chr11_28661532_28676451	3900	4577	+	RT_tat
Chr11_28661532_28676451	4762	5046	+	RNaseH_tat
Chr11_28661532_28676451	5843	6712	+	INT_tat
Chr11_28707296_28713608	1766	2389	+	GAG_tork
Chr11_28707296_28713608	2489	2743	+	AP_tork
Chr11_28707296_28713608	2915	3244	+	INT_tork
Chr11_28707296_28713608	4177	4737	+	RT_tork
Chr11_28707296_28713608	5205	5549	+	RNaseH_tork
Chr11_3398453_3409976	5497	6093	+	GAG_del
Chr11_3398453_3409976	6526	6783	+	AP_del
Chr11_3398453_3409976	7078	7752	+	RT_del
Chr11_3398453_3409976	7888	8238	+	RNaseH_del
Chr11_3398453_3409976	8542	9576	+	INT_del
Chr11_3398453_3409976	9640	9783	+	CHR_retroelement
Chr11_378146_384253	706	1449	+	GAG_tork
Chr11_378146_384253	1567	1815	+	AP_tork
Chr11_378146_384253	1966	2607	+	INT_tork
Chr11_378146_384253	3091	3819	+	RT_tork
Chr11_378146_384253	4102	4515	+	RNaseH_tork
Chr11_3934613_3948717	1810	2517	+	GAG_tat
Chr11_3934613_3948717	2878	3210	+	AP_tat
Chr11_3934613_3948717	3643	4320	+	RT_tat
Chr11_3934613_3948717	4456	4836	+	RNaseH_tat
Chr11_3934613_3948717	5567	6535	+	INT_tat
Chr11_3961427_3975420	8449	9084	+	GAG_del
Chr11_3961427_3975420	9396	9653	+	AP_del
Chr11_3961427_3975420	9981	10655	+	RT_del
Chr11_3961427_3975420	10791	11141	+	RNaseH_del
Chr11_3961427_3975420	11445	12479	+	INT_del
Chr11_3961427_3975420	12537	12689	+	CHR_retroelement
Chr11_4265814_4282841	8726	9520	+	GAG_del
Chr11_4265814_4282841	9755	10012	+	AP_del
Chr11_4265814_4282841	10307	10981	+	RT_del
Chr11_4265814_4282841	11117	11467	+	RNaseH_del
Chr11_4265814_4282841	11771	12286	+	INT_del
Chr11_4265814_4282841	12865	13011	+	CHR_retroelement
Chr11_4459822_4462839	196	336	+	INT_tork
Chr11_4459822_4462839	754	1479	+	RT_tork
Chr11_4459822_4462839	1762	2175	+	RNaseH_tork
Chr11_4491935_4494572	300	1043	+	GAG_tork
Chr11_4491935_4494572	1161	1409	+	AP_tork
Chr11_4491935_4494572	1560	2201	+	INT_tork
Chr11_4536475_4543785	2133	2459	+	GAG_athila
Chr11_4536475_4543785	5692	6018	+	INT_tat
Chr11_492227_503870	1889	2374	+	GAG_tat
Chr11_492227_503870	3062	3388	+	AP_tat
Chr11_492227_503870	3614	3781	+	RT_tat
Chr11_492227_503870	6287	7267	+	INT_tat
Chr11_4948382_4960899	1891	2370	+	GAG_tat
Chr11_4948382_4960899	3064	3390	+	AP_tat
Chr11_4948382_4960899	3616	3783	+	RT_tat
Chr11_4948382_4960899	6288	7331	+	INT_tat
Chr11_4976011_4989019	2091	2801	+	GAG_tat
Chr11_4976011_4989019	3159	3491	+	AP_tat
Chr11_4976011_4989019	3894	4571	+	RT_tat
Chr11_4976011_4989019	4706	5068	+	RNaseH_tat
Chr11_4976011_4989019	5837	6880	+	INT_tat
Chr11_4998143_5003671	892	1404	+	GAG_oryco
Chr11_4998143_5003671	1891	2139	+	AP_oryco
Chr11_4998143_5003671	2287	2940	+	INT_oryco
Chr11_4998143_5003671	3661	4032	+	RT_oryco
Chr11_4998143_5003671	4670	5074	+	RNaseH_oryco
Chr11_5034726_5040714	2034	2564	+	GAG_tork
Chr11_5034726_5040714	2758	2934	+	AP_tork
Chr11_5034726_5040714	3813	4013	+	RT_tork
Chr11_5034726_5040714	4892	5044	+	RNaseH_tork
Chr11_5042262_5055118	1881	2360	+	GAG_tat
Chr11_5042262_5055118	3054	3380	+	AP_tat
Chr11_5042262_5055118	3606	3773	+	RT_tat
Chr11_5042262_5055118	6262	7305	+	INT_tat
Chr11_5156791_5162312	1904	2380	+	GAG_tat
Chr11_5156791_5162312	2580	2882	+	INT_tat
Chr11_5156791_5162312	3819	4217	+	RNaseH_tat
Chr11_517640_525459	1325	2458	+	GAG_sire
Chr11_517640_525459	3760	3999	+	AP_sire
Chr11_517640_525459	4153	4809	+	INT_sire
Chr11_517640_525459	5156	5806	+	RT_sire
Chr11_517640_525459	6166	6567	+	RNaseH_sire
Chr11_5499678_5511231	4175	5002	+	GAG_del
Chr11_5499678_5511231	5135	5392	+	AP_del
Chr11_5499678_5511231	5720	6394	+	RT_del
Chr11_5499678_5511231	6530	6880	+	RNaseH_del
Chr11_5499678_5511231	7184	8218	+	INT_del
Chr11_5499678_5511231	8279	8428	+	CHR_retroelement
Chr11_5547217_5553092	1918	2448	+	GAG_tork
Chr11_5547217_5553092	2636	2812	+	AP_tork
Chr11_5547217_5553092	3696	4106	+	RT_tork
Chr11_5547217_5553092	4736	4936	+	RNaseH_tork
Chr11_5736620_5744019	3730	4275	+	INT_copia
Chr11_5736620_5744019	5194	5925	+	RT_tork
Chr11_5736620_5744019	6238	6441	+	RNaseH_tork
Chr11_5963001_5974298	1782	2489	+	GAG_tat
Chr11_5963001_5974298	2850	3182	+	AP_tat
Chr11_5963001_5974298	3614	4291	+	RT_tat
Chr11_5963001_5974298	4427	4807	+	RNaseH_tat
Chr11_5963001_5974298	5661	6578	+	INT_tat
Chr11_6006998_6019519	5078	5896	+	GAG_del
Chr11_6006998_6019519	6029	6286	+	AP_del
Chr11_6006998_6019519	6614	7288	+	RT_del
Chr11_6006998_6019519	7424	7774	+	RNaseH_del
Chr11_6006998_6019519	8078	9112	+	INT_del
Chr11_6006998_6019519	9170	9322	+	CHR_retroelement
Chr11_6047057_6056461	2849	3523	+	GAG_del
Chr11_6047057_6056461	3587	4201	+	RT_del
Chr11_6047057_6056461	4337	4687	+	RNaseH_del
Chr11_6047057_6056461	4991	6025	+	INT_del
Chr11_6047057_6056461	6086	6235	+	CHR_retroelement
Chr11_6149361_6155356	2039	2575	+	GAG_tork
Chr11_6149361_6155356	2772	2945	+	AP_tork
Chr11_6149361_6155356	4854	5054	+	RNaseH_tork
Chr11_6173675_6185244	4386	5171	+	GAG_del
Chr11_6173675_6185244	5331	5588	+	AP_del
Chr11_6173675_6185244	5874	6548	+	RT_del
Chr11_6173675_6185244	6684	7034	+	RNaseH_del
Chr11_6173675_6185244	7338	8372	+	INT_del
Chr11_6173675_6185244	8433	8582	+	CHR_retroelement
Chr11_6245612_6256800	3129	3461	+	AP_tat
Chr11_6245612_6256800	4504	4812	+	RNaseH_tat
Chr11_6245612_6256800	5581	6624	+	INT_tat
Chr11_6313519_6319727	972	1451	+	GAG_tork
Chr11_6313519_6319727	1685	1933	+	AP_tork
Chr11_6313519_6319727	2084	2725	+	INT_tork
Chr11_6313519_6319727	3209	3934	+	RT_tork
Chr11_6313519_6319727	4217	4585	+	RNaseH_tork
Chr11_6497514_6505996	613	1005	+	GAG_reina
Chr11_6497514_6505996	1502	1762	+	AP_reina
Chr11_6497514_6505996	2132	2806	+	RT_reina
Chr11_6497514_6505996	2948	3298	+	RNaseH_reina
Chr11_6497514_6505996	3530	3739	+	INT_reina
Chr11_6569800_6577648	1650	2078	+	GAG_athila
Chr11_6569800_6577648	3125	3406	+	AP_athila
Chr11_6709967_6721454	4605	5405	+	GAG_del
Chr11_6709967_6721454	5565	5822	+	AP_del
Chr11_6709967_6721454	6108	6782	+	RT_del
Chr11_6709967_6721454	6918	7268	+	RNaseH_del
Chr11_6709967_6721454	7572	8606	+	INT_del
Chr11_6709967_6721454	8664	8816	+	CHR_retroelement
Chr11_6732627_6745834	5780	6595	+	GAG_del
Chr11_6732627_6745834	6761	7018	+	AP_del
Chr11_6732627_6745834	7304	7978	+	RT_del
Chr11_6732627_6745834	8114	8464	+	RNaseH_del
Chr11_6732627_6745834	8768	9802	+	INT_del
Chr11_6762595_6772398	4642	5442	+	GAG_del
Chr11_6762595_6772398	5602	5859	+	AP_del
Chr11_6762595_6772398	6145	6819	+	RT_del
Chr11_6762595_6772398	6955	7305	+	RNaseH_del
Chr11_6762595_6772398	7609	8643	+	INT_del
Chr11_6804161_6815742	4138	4953	+	GAG_del
Chr11_6804161_6815742	5119	5376	+	AP_del
Chr11_6804161_6815742	5662	6336	+	RT_del
Chr11_6804161_6815742	6472	6822	+	RNaseH_del
Chr11_6804161_6815742	7126	8160	+	INT_del
Chr11_6804161_6815742	8218	8370	+	CHR_retroelement
Chr11_7160318_7173185	1868	2365	+	GAG_tat
Chr11_7160318_7173185	3041	3367	+	AP_tat
Chr11_7160318_7173185	3593	3760	+	RT_tat
Chr11_7160318_7173185	6266	7309	+	INT_tat
Chr11_7178950_7183365	2292	2774	+	GAG_crm
Chr11_7284203_7294666	5104	5922	+	GAG_del
Chr11_7284203_7294666	6055	6162	+	AP_del
Chr11_7296470_7308547	4638	5252	+	GAG_del
Chr11_7296470_7308547	5619	5876	+	AP_del
Chr11_7296470_7308547	6162	6836	+	RT_del
Chr11_7296470_7308547	6972	7322	+	RNaseH_del
Chr11_7296470_7308547	7626	8660	+	INT_del
Chr11_7296470_7308547	8718	8870	+	CHR_retroelement
Chr11_7445415_7458286	1942	2421	+	GAG_tat
Chr11_7445415_7458286	3115	3441	+	AP_tat
Chr11_7445415_7458286	3667	3834	+	RT_tat
Chr11_7445415_7458286	6339	7382	+	INT_tat
Chr11_8038456_8046019	2553	3329	+	GAG_crm
Chr11_8038456_8046019	3579	3845	+	AP_crm
Chr11_8038456_8046019	4355	5029	+	RT_crm
Chr11_8038456_8046019	5165	5515	+	RNaseH_crm
Chr11_8038456_8046019	5732	6763	+	INT_crm
Chr11_8111454_8121601	3151	3483	+	AP_tat
Chr11_8111454_8121601	3886	4563	+	RT_tat
Chr11_8111454_8121601	4699	5061	+	RNaseH_tat
Chr11_8111454_8121601	5830	6114	+	INT_tat
Chr11_8225656_8237385	4558	5340	+	GAG_del
Chr11_8225656_8237385	5500	5757	+	AP_del
Chr11_8225656_8237385	6043	6717	+	RT_del
Chr11_8225656_8237385	6853	7203	+	RNaseH_del
Chr11_8225656_8237385	7507	8541	+	INT_del
Chr11_8225656_8237385	8602	8751	+	CHR_retroelement
Chr11_8251146_8260518	3182	3952	+	GAG_del
Chr11_8251146_8260518	4112	4369	+	AP_del
Chr11_8251146_8260518	4655	5329	+	RT_del
Chr11_8251146_8260518	5497	5805	+	RNaseH_del
Chr11_8251146_8260518	6109	7143	+	INT_del
Chr11_8251146_8260518	7204	7353	+	CHR_retroelement
Chr11_8306649_8316649	1195	1494	+	INT_tat
Chr11_8320311_8332338	7235	7579	+	GAG_crm
Chr11_8345266_8351722	1114	1488	+	INT_tat
Chr11_8423648_8436526	1883	2377	+	GAG_tat
Chr11_8423648_8436526	3056	3382	+	AP_tat
Chr11_8423648_8436526	3608	3775	+	RT_tat
Chr11_8423648_8436526	6281	7324	+	INT_tat
Chr11_8491797_8503082	1806	2513	+	GAG_tat
Chr11_8491797_8503082	2871	3203	+	AP_tat
Chr11_8491797_8503082	3636	4313	+	RT_tat
Chr11_8491797_8503082	4449	4829	+	RNaseH_tat
Chr11_8491797_8503082	5556	6599	+	INT_tat
Chr11_871572_876901	2272	2733	+	INT_retrofit
Chr11_871572_876901	3734	4459	+	RT_retrofit
Chr11_871572_876901	4748	5149	+	RNaseH_retrofit
Chr11_8886233_8898237	4769	5551	+	GAG_del
Chr11_8886233_8898237	5711	5968	+	AP_del
Chr11_8886233_8898237	6254	6928	+	RT_del
Chr11_8886233_8898237	7064	7414	+	RNaseH_del
Chr11_8886233_8898237	7718	8752	+	INT_del
Chr11_8886233_8898237	8813	8962	+	CHR_retroelement
Chr11_917402_927833	2423	3217	+	GAG_del
Chr11_917402_927833	3452	3709	+	AP_del
Chr11_917402_927833	4004	4678	+	RT_del
Chr11_917402_927833	4814	5164	+	RNaseH_del
Chr11_917402_927833	5468	6502	+	INT_del
Chr11_917402_927833	6569	6709	+	CHR_retroelement
Chr11_9206913_9212616	430	1173	+	GAG_tork
Chr11_9206913_9212616	1291	1539	+	AP_tork
Chr11_9206913_9212616	1904	2332	+	INT_tork
Chr11_9206913_9212616	2998	3543	+	RT_tork
Chr11_9206913_9212616	3826	4158	+	RNaseH_tork
Chr11_9335920_9348725	1898	2377	+	GAG_tat
Chr11_9335920_9348725	3071	3397	+	AP_tat
Chr11_9335920_9348725	3809	4486	+	RT_tat
Chr11_9335920_9348725	5090	5488	+	RNaseH_tat
Chr11_9335920_9348725	6296	7219	+	INT_tat
Chr11_9354861_9367871	5340	6158	+	GAG_del
Chr11_9354861_9367871	6291	6548	+	AP_del
Chr11_9354861_9367871	6876	7550	+	RT_del
Chr11_9354861_9367871	7686	8036	+	RNaseH_del
Chr11_9354861_9367871	8340	9374	+	INT_del
Chr11_9354861_9367871	9432	9584	+	CHR_retroelement
Chr11_9516952_9531407	2059	2769	+	GAG_tat
Chr11_9516952_9531407	6137	6463	+	AP_tat
Chr11_9516952_9531407	6865	7542	+	RT_tat
Chr11_9516952_9531407	7678	8040	+	RNaseH_tat
Chr11_9516952_9531407	9232	9849	+	INT_tat
Chr11_9648028_9656670	1006	1935	+	GAG_sire
Chr11_9648028_9656670	3432	3671	+	AP_sire
Chr11_9648028_9656670	3825	4340	+	INT_sire
Chr11_9648028_9656670	5155	5880	+	RT_sire
Chr11_9648028_9656670	6166	6567	+	RNaseH_sire
Chr11_9697128_9701786	280	972	+	GAG_tork
Chr11_9697128_9701786	1123	1374	+	AP_tork
Chr11_9697128_9701786	1534	2178	+	INT_tork
Chr11_9697128_9701786	2755	3489	+	RT_tork
Chr11_9697128_9701786	3793	4194	+	RNaseH_tork
Chr11_975305_984915	682	1602	+	GAG_sire
Chr11_975305_984915	2902	3144	+	AP_sire
Chr11_975305_984915	3298	3954	+	INT_sire
Chr11_975305_984915	4633	5355	+	RT_sire
Chr11_975305_984915	5641	6042	+	RNaseH_sire
Chr12_10023741_10037549	5659	6453	+	GAG_del
Chr12_10023741_10037549	6688	6945	+	AP_del
Chr12_10023741_10037549	7240	7914	+	RT_del
Chr12_10023741_10037549	8050	8400	+	RNaseH_del
[truncated: 10,568 more rows]

## Sheet: S4
Table S4. Age distribution of LTR-RTs
Superfamily	Family	Range of LTR similarity	Count
Gypsy	del	100	3
		>95	538
		>90	34
		>85	2
	tat	100	28
		>95	338
		>90	128
		>85	12
		>80	2
	reina	100	2
		>95	35
		>90	12
		>85	5
	crm	>95	27
		>90	9
	mixture	100	2
		>95	26
		>90	18
		>85	5
Copia	tork	100	5
		>95	165
		>90	101
		>85	20
		>80	6
	oryco	100	4
		>95	65
		>90	13
		>85	3
	sire	>95	44
		>90	32
		>85	2
		>80	2
	retrofit	100	3
		>95	33
		>90	14
		>85	2
		>80	1
	mixture	100	6
		>95	21
		>90	13
		>85	1
		>80	1

## Sheet: S5
Table S5. DongjinOryco Blast Hit using EST database
Active LTR-RTs	Description	Scientific Name	Query Coverage	E value	Identity (%)	Accession Length	Accession
DongjinOryco1	OSJNEd12P22.f OSJNEd Oryza sativa Japonica Group cDNA clone OSJNEd12P22 5', mRNA sequence	Oryza sativa Japonica Group	0.11	0	96.7	667	CB666196.1
	PXrpxc_3995 mycelium, starved in water Phytophthora infestans cDNA, mRNA sequence	Phytophthora infestans	0.1	0	99.83	599	CV956724.1
	CI195437 Oryza sativa (japonica cultivar-group) root of seedlings Oryza sativa Japonica Group cDNA clone 036-M078R-H05 3', mRNA sequence	Oryza sativa Japonica Group	0.16	0	96.78	714	CI195437.1
	sdgacb0_007237.z1.scf cDNA library of the rhizome tip of Oryza longistaminata Oryza longistaminata cDNA, mRNA sequence	Oryza longistaminata	0.1	0	97.71	612	JK503378.1
	CI196719 Oryza sativa (japonica cultivar-group) root of seedlings Oryza sativa Japonica Group cDNA clone 036-M093R-G05 3', mRNA sequence	Oryza sativa Japonica Group	0.16	0	96.42	677	CI196719.1
	CI243229 Oryza sativa (japonica cultivar-group) Shoot and root of germinating seeds Oryza sativa Japonica Group cDNA clone 042-M095R-H01 3', mRNA sequence	Oryza sativa Japonica Group	0.14	0	99.62	521	CI243229.1
	CI263207 Oryza sativa (japonica cultivar-group) Shoot and root of germinating seeds Oryza sativa Japonica Group cDNA clone 046-M032R-E01 3', mRNA sequence	Oryza sativa Japonica Group	0.14	0	96.39	587	CI263207.1
	56345rsicek_10869.y1 Oryza sativa cv. PA64s panicle ferile cDNA library Oryza sativa Indica Group cDNA 5', mRNA sequence	Oryza sativa Indica Group	0.08	0	97.79	503	CK056329.1
	CI263798 Oryza sativa (japonica cultivar-group) Shoot and root of germinating seeds Oryza sativa Japonica Group cDNA clone 046-M038R-G10 3', mRNA sequence	Oryza sativa Japonica Group	0.13	0	96.04	517	CI263798.1
	CI611631 Oryza sativa (japonica cultivar-group) callus Oryza sativa Japonica Group cDNA clone J03B3058O19T3 5', mRNA sequence	Oryza sativa Japonica Group	0.07	0	97.79	408	CI611631.1
	CI743343 Oryza sativa (japonica cultivar-group) library (Kikuchi S) Oryza sativa Japonica Group cDNA clone J09B0040M20T3 5', mRNA sequence	Oryza sativa Japonica Group	0.12	0	96.54	407	CI743343.1
	CI657531 Oryza sativa (japonica cultivar-group) callus suspension-cultured cells treated with elicitor Oryza sativa Japonica Group cDNA clone J06B5147E19T3 5', mRNA sequence	Oryza sativa Japonica Group	0.06	2e-177	96.36	386	CI657531.1
	RICR1718A Rice root Oryza sativa Japonica Group cDNA clone R1718_1A, mRNA sequence	Oryza sativa Japonica Group	0.06	6e-173	97.49	358	D24315.1
	BX928978 Oryza sativa library (Han B) Oryza sativa cDNA clone y832g04p5, mRNA sequence	Oryza sativa	0.06	2e-163	96.39	704	BX928978.1
	CI209096 Oryza sativa (japonica cultivar-group) same as Lib 33(supermix) Oryza sativa Japonica Group cDNA clone 038-M034R-H04 3', mRNA sequence	Oryza sativa Japonica Group	0.1	5e-149	99.33	596	CI209096.1
	CI160681 Oryza sativa (japonica cultivar-group) Panicles mixture of one, two, three weeks after flowering Oryza sativa Japonica Group cDNA clone 030-M071R-A09 3', mRNA sequence	Oryza sativa Japonica Group	0.1	3e-121	96.65	497	CI160681.1
	Xa21_454_72430 Oryza longistaminata cultivar IRGC 110404 Xa21 transcriptome Oryza longistaminata cDNA clone Xa21_454_72430, mRNA sequence	Oryza longistaminata	0.03	1e-85	95.24	208	HS334436.1
	73678rsicem_7237.y1 Oryza sativa cv. PA64s panicle ferile cDNA library Oryza sativa Indica Group cDNA 5', mRNA sequence	Oryza sativa Indica Group	0.03	7e-73	95.05	202	CK066157.1
	Xa21_454_33282 Oryza longistaminata cultivar IRGC 110404 Xa21 transcriptome Oryza longistaminata cDNA clone Xa21_454_33282, mRNA sequence	Oryza longistaminata	0.05	6e-59	95.36	222	HS339574.1
	CI708552 Oryza sativa (japonica cultivar-group) 10 days after pollination pistil Oryza sativa Japonica Group cDNA clone J07B5183N03T3 5', mRNA sequence	Oryza sativa Japonica Group	0.03	2e-38	98.96	373	CI708552.1
	CI701506 Oryza sativa (japonica cultivar-group) 10 days after pollination pistil Oryza sativa Japonica Group cDNA clone J07B5148D11T3 5', mRNA sequence	Oryza sativa Japonica Group	0.03	2e-38	98.96	341	CI701506.1
	AF53-Rpf_08_D20_T7_074.ab1 IRRI Drought Stress Panicle Library Oryza sativa Indica Group cDNA clone C0002780 5' similar to Alpha-L-arabinofuranosidase A precursor (EC 3.2.1.55) (Arabinosidase A) (ABF A), mRNA sequence	Oryza sativa Indica Group	0.03	5e-35	96.88	794	CA765627.2
	AF53-Rpf_13_M18_T7_071.ab1 IRRI Drought Stress Panicle Library Oryza sativa Indica Group cDNA clone C0004914 5', mRNA sequence	Oryza sativa Indica Group	0.03	2e-34	96.88	783	CB097160.1
	BR060009B20A05.ab1 IRRI clones Oryza sativa Indica Group cDNA clone BR060009B20A05.ab1 similar to (AC037425) hypothetical protein [Oryza sativa], mRNA sequence	Oryza sativa Indica Group	0.03	8e-33	95.83	571	CA759050.1
	CI233044 Oryza sativa (japonica cultivar-group) Panicles mixture of one, two, three weeks after flowering and root of seedlings Oryza sativa Japonica Group cDNA clone 041-M057R-B06 3', mRNA sequence	Oryza sativa Japonica Group	0.01	0.0006	100	560	CI233044.1
DongjinOryco2	OSJNEd12P22.f OSJNEd Oryza sativa Japonica Group cDNA clone OSJNEd12P22 5', mRNA sequence	Oryza sativa Japonica Group	0.11	0	97.6	667	CB666196.1
	sdgacb0_007237.z1.scf cDNA library of the rhizome tip of Oryza longistaminata Oryza longistaminata cDNA, mRNA sequence	Oryza longistaminata	0.1	0	97.88	612	JK503378.1
	PXrpxc_3995 mycelium, starved in water Phytophthora infestans cDNA, mRNA sequence	Phytophthora infestans	0.1	0	98.17	599	CV956724.1
	S067C08 Stem library from Oryza sativa (3-5 leaf stage) Oryza sativa cDNA clone S067C08, mRNA sequence	Oryza sativa	0.1	0	97.05	651	BI806499.1
	CI195437 Oryza sativa (japonica cultivar-group) root of seedlings Oryza sativa Japonica Group cDNA clone 036-M078R-H05 3', mRNA sequence	Oryza sativa Japonica Group	0.11	0	97.05	714	CI195437.1
	CI228796 Oryza sativa (japonica cultivar-group) Panicles mixture of one, two, three weeks after flowering and root of seedlings Oryza sativa Japonica Group cDNA clone 041-M005R-E04 3', mRNA sequence	Oryza sativa Japonica Group	0.14	0	98.43	515	CI228796.1
	CI196719 Oryza sativa (japonica cultivar-group) root of seedlings Oryza sativa Japonica Group cDNA clone 036-M093R-G05 3', mRNA sequence	Oryza sativa Japonica Group	0.11	0	96.63	677	CI196719.1
	56345rsicek_10869.y1 Oryza sativa cv. PA64s panicle ferile cDNA library Oryza sativa Indica Group cDNA 5', mRNA sequence	Oryza sativa Indica Group	0.08	0	96.39	503	CK056329.1
	CI611631 Oryza sativa (japonica cultivar-group) callus Oryza sativa Japonica Group cDNA clone J03B3058O19T3 5', mRNA sequence	Oryza sativa Japonica Group	0.07	0	97.3	408	CI611631.1
	CI263207 Oryza sativa (japonica cultivar-group) Shoot and root of germinating seeds Oryza sativa Japonica Group cDNA clone 046-M032R-E01 3', mRNA sequence	Oryza sativa Japonica Group	0.09	0	96.63	587	CI263207.1
	CI657531 Oryza sativa (japonica cultivar-group) callus suspension-cultured cells treated with elicitor Oryza sativa Japonica Group cDNA clone J06B5147E19T3 5', mRNA sequence	Oryza sativa Japonica Group	0.06	0	98.7	386	CI657531.1
	CI471445 Oryza sativa (japonica cultivar-group) 1 week after flowering ear Oryza sativa Japonica Group cDNA clone J07B5104D24M3 3', mRNA sequence	Oryza sativa Japonica Group	0.13	0	95	420	CI471445.1
	CI483079 Oryza sativa (japonica cultivar-group) 1 week after flowering ear Oryza sativa Japonica Group cDNA clone J07B5156G10M3 3', mRNA sequence	Oryza sativa Japonica Group	0.12	8e-177	95.04	401	CI483079.1
	CI454026 Oryza sativa (japonica cultivar-group) 20 days after pollination pistil Oryza sativa Japonica Group cDNA clone J07B5026G19M3 3', mRNA sequence	Oryza sativa Japonica Group	0.11	4e-170	99.7	408	CI454026.1
	CI482416 Oryza sativa (japonica cultivar-group) 20 days after pollination pistil Oryza sativa Japonica Group cDNA clone J07B5153K02M3 3', mRNA sequence	Oryza sativa Japonica Group	0.11	5e-169	99.4	392	CI482416.1
	ABF1--03-O13.g1 ABF3-overexpressing transgenic rice lambda phage cDNA library (ABF1) Oryza sativa Japonica Group cDNA clone ABF1--03-O13, mRNA sequence	Oryza sativa Japonica Group	0.11	2e-163	98.22	506	CF304040.1
	RICR1718A Rice root Oryza sativa Japonica Group cDNA clone R1718_1A, mRNA sequence	Oryza sativa Japonica Group	0.06	6e-163	95.81	358	D24315.1
	BX928978 Oryza sativa library (Han B) Oryza sativa cDNA clone y832g04p5, mRNA sequence	Oryza sativa	0.06	1e-155	95	704	BX928978.1
	CI263798 Oryza sativa (japonica cultivar-group) Shoot and root of germinating seeds Oryza sativa Japonica Group cDNA clone 046-M038R-G10 3', mRNA sequence	Oryza sativa Japonica Group	0.08	1e-155	96.22	517	CI263798.1
	Xa21_454_72430 Oryza longistaminata cultivar IRGC 110404 Xa21 transcriptome Oryza longistaminata cDNA clone Xa21_454_72430, mRNA sequence	Oryza longistaminata	0.03	6e-89	96.19	208	HS334436.1
	73678rsicem_7237.y1 Oryza sativa cv. PA64s panicle ferile cDNA library Oryza sativa Indica Group cDNA 5', mRNA sequence	Oryza sativa Indica Group	0.03	2e-74	95.6	202	CK066157.1
	OSE-193-288-C11 OSE Oryza sativa Indica Group cDNA clone OSE-193-288-C11 similar to UNKNOWN PROTEIN, mRNA sequence	Oryza sativa Indica Group	0.04	3e-57	96.5	415	ES351675.1
	CI524740 Oryza sativa (japonica cultivar-group) 1 day after pollination pistil Oryza sativa Japonica Group cDNA clone J09B0036H08M3 3', mRNA sequence	Oryza sativa Japonica Group	0.04	1e-55	95.8	396	CI524740.1
	CI519522 Oryza sativa (japonica cultivar-group) after pollination embryo Oryza sativa Japonica Group cDNA clone J09B0011K23M3 3', mRNA sequence	Oryza sativa Japonica Group	0.04	1e-55	95.8	411	CI519522.1
	CI525656 Oryza sativa (japonica cultivar-group) after pollination embryo Oryza sativa Japonica Group cDNA clone J09B0041C16M3 3', mRNA sequence	Oryza sativa Japonica Group	0.04	1e-55	95.8	373	CI525656.1
	CI537508 Oryza sativa (japonica cultivar-group) after pollination embryo Oryza sativa Japonica Group cDNA clone J09B0098D12M3 3', mRNA sequence	Oryza sativa Japonica Group	0.04	1e-55	95.8	387	CI537508.1
	CI526243 Oryza sativa (japonica cultivar-group) after pollination embryo Oryza sativa Japonica Group cDNA clone J09B0044G19M3 3', mRNA sequence	Oryza sativa Japonica Group	0.04	2e-54	95.1	376	CI526243.1
	CI708552 Oryza sativa (japonica cultivar-group) 10 days after pollination pistil Oryza sativa Japonica Group cDNA clone J07B5183N03T3 5', mRNA sequence	Oryza sativa Japonica Group	0.03	5e-40	100	373	CI708552.1
	CI701506 Oryza sativa (japonica cultivar-group) 10 days after pollination pistil Oryza sativa Japonica Group cDNA clone J07B5148D11T3 5', mRNA sequence	Oryza sativa Japonica Group	0.03	5e-40	100	341	CI701506.1
	AF53-Rpf_08_D20_T7_074.ab1 IRRI Drought Stress Panicle Library Oryza sativa Indica Group cDNA clone C0002780 5' similar to Alpha-L-arabinofuranosidase A precursor (EC 3.2.1.55) (Arabinosidase A) (ABF A), mRNA sequence	Oryza sativa Indica Group	0.03	1e-36	97.92	794	CA765627.2
	AF53-Rpf_13_M18_T7_071.ab1 IRRI Drought Stress Panicle Library Oryza sativa Indica Group cDNA clone C0004914 5', mRNA sequence	Oryza sativa Indica Group	0.03	2e-34	95.96	783	CB097160.1
	WHE4328_E01_J02ZS Wheat meiotic anther cDNA library Triticum aestivum cDNA clone WHE4328_E01_J02, mRNA sequence	Triticum aestivum	0.02	4e-31	98.81	630	CA486194.1
	606019F03.x2 606 - Ear tissue cDNA library from Schmidt lab Zea mays cDNA, mRNA sequence	Zea mays	0.01	2e-19	95.59	504	AI714783.1

## Sheet: S6
Table S6. Full length of EST matched DongjinOryco
	DongjinOryco1							DongjinOryco2
Accession	Query start	Query End	Alignment Length	Mismatch	Gap Open	Subject Start	Subject End	Query start	Query End	Alignment Length	Mismatch	Gap Open	Subject Start	Subject End
CB666196.1	2505	3171	667	22	0	1	667	2545	3211	667	16	0	1	667
CV956724.1	1328	1927	600	0	1	599	1	1368	1967	600	10	1	599	1
JK503378.1	4301	4912	612	14	0	1	612	4344	4955	612	13	0	1	612
CI611631.1	3586	3993	408	9	0	1	408	3629	4036	408	11	0	1	408
HS334436.1	4452	4660	210	7	3	1	208	4495	4703	210	5	3	1	208
CI243229.1	5095	5615	521	2	0	1	521
CI483079.1								5294	5691	403	13	3	1	401

## Sheet: S7
Table S7. LTR pair sequence similarity of LTR-RTs with slightly increasing transpositional potential
LTR	Family	Identity (%)
Chr4_29687987_29699289	Gypsy_tat	99.77
Chr12_16642622_16653916	Gypsy_tat	100
Chr8_8091354_8102655	Gypsy_tat	100
Chr1_4469011_4483872	Gypsy_tat	100
Chr2_320584_331915	Gypsy_tat	99.55
Chr6_21137030_21150830	Gypsy_tat	97.73
